# Supplementary material
Source: PubMed Central journal article supplement (PMC11030614)
Supplement: 262_2008_479_MOESM1_ESM.pdf [file 262_2008_479_MOESM1_ESM.pdf]

**Supplementary Table 1. Gene-regulations (log<sub>2</sub>-folds) in CD8+ cells from 25 patients dosed with IL-21.** For each probeset the Affymetrix identifier (Affy ID), Gene symbol (Symbol), Gene name (Name), False Discovery Rate corrected P-value (fdrP), and log<sub>2</sub>-folds (Day 5 versus Day 1) for individual patients from both regimens (5+9 and 3x/wk) are listed.

| affyID       | Symbol   | Name                                                                     | fdrP        | 1 µg/kg (3 x w.) | 1 µg/kg (3 x w.) | 1 µg/kg (5+9) | 1 µg/kg (5+9) | 3 µg/kg (3 x w.) | 3 µg/kg (3 x w.) | 3 µg/kg (5+9) | 3 µg/kg (5+9) | 10 µg/kg (3 x w.) | 10 µg/kg (3 x w.) | 10 µg/kg (5+9) | 10 µg/kg (5+9) | 30 µg/kg (3 x w.) | 30 µg/kg (3 x w.) | 30 µg/kg (5+9) | 30 µg/kg (5+9) | 50 µg/kg (3 x w.) | 50 µg/kg (3 x w.) | 50 µg/kg (5+9) | 50 µg/kg (5+9) | 100 µg/kg (3 x w.) | 100 µg/kg (3 x w.) | 100 µg/kg (5+9) | 100 µg/kg (5+9) |     |
|--------------|----------|--------------------------------------------------------------------------|-------------|------------------|------------------|---------------|---------------|------------------|------------------|---------------|---------------|-------------------|-------------------|----------------|----------------|-------------------|-------------------|----------------|----------------|-------------------|-------------------|----------------|----------------|--------------------|--------------------|-----------------|-----------------|-----|
| 203764_at    | DLG7     | discs, large homolog 7 (Drosophila)                                      | 0.000389932 | -0.2             | -0.2             | 0.4           | 2.0           | 0.0              | -0.5             | 2.7           | 3.7           | 1.9               | 2.9               | 4.2            | 5.4            | 4.4               | 5.1               | 3.6            | 4.2            | 4.3               | 2.6               | 4.2            | 5.1            | 4.7                | 5.4                | 3.2             | 3.5             | 3.4 |
| 210354_at    | IFNG     | interferon, gamma                                                        | 0.000211352 | 0.6              | 0.7              | -0.4          | 0.3           | 1.1              | 2.6              | 1.7           | 2.3           | 2.4               | 1.2               | 5.3            | 5.5            | 4.5               | 5.5               | 2.9            | 4.7            | 4.8               | 3.0               | 2.8            | 4.2            | 5.1                | 5.3                | 3.1             | 4.0             | 3.3 |
| 209773_s_at  | RRM2     | ribonucleotide reductase M2 polypeptide                                  | 0.00172172  | -0.1             | 0.5              | -0.5          | 1.9           | 1.0              | 0.2              | 2.6           | 4.1           | 1.7               | 3.0               | 3.3            | 5.6            | 4.4               | 4.2               | 3.4            | 3.4            | 3.2               | 4.2               | 4.0            | 4.8            | 5.1                | 4.8                | 2.2             | 2.8             | 3.1 |
| 207165_at    | HMMR     | hyaluronan-mediated motility receptor (RHAMM)                            | 0.000400172 | 0.1              | -0.3             | 0.6           | 1.7           | 0.3              | 0.4              | 2.7           | 3.0           | 0.9               | 2.4               | 3.7            | 5.3            | 3.8               | 4.0               | 3.3            | 3.8            | 3.6               | 2.6               | 3.5            | 4.7            | 4.7                | 5.3                | 3.0             | 3.9             | 3.1 |
| 218585_s_at  | DTL      | denticleless homolog (Drosophila)                                        | 0.000403636 | -0.1             | -0.3             | 0.9           | 2.0           | -0.7             | -0.8             | 3.0           | 3.8           | 1.7               | 2.8               | 4.3            | 5.1            | 4.1               | 4.4               | 2.8            | 4.0            | 3.8               | 3.2               | 3.7            | 4.8            | 3.9                | 5.0                | 2.6             | 2.9             | 3.7 |
| 201291_s_at  | TOP2A    | topoisomerase (DNA) II alpha 170kDa                                      | 0.000437438 | 0.5              | 0.4              | 0.5           | 2.0           | -0.4             | -0.3             | 2.6           | 3.8           | 1.5               | 2.8               | 3.7            | 4.8            | 3.8               | 3.6               | 3.8            | 3.5            | 4.2               | 3.9               | 4.2            | 5.0            | 4.1                | 4.4                | 2.4             | 2.4             | 3.4 |
| 214710_s_at  | CCNB1    | cyclin B1                                                                | 0.000356177 | -0.1             | -0.5             | 0.1           | 1.1           | 0.3              | -0.3             | 2.5           | 2.7           | 1.0               | 1.9               | 3.1            | 4.3            | 3.6               | 4.1               | 3.4            | 3.5            | 3.8               | 2.2               | 3.1            | 4.6            | 4.8                | 5.0                | 3.3             | 4.0             | 2.9 |
| 218542_at    | C10orf3  | chromosome 10 open reading frame 3                                       | 0.000564283 | 0.3              | 0.2              | 0.0           | 0.9           | 0.0              | 0.0              | 2.4           | 2.8           | 1.8               | 2.0               | 4.0            | 4.5            | 3.7               | 4.2               | 3.5            | 4.7            | 4.1               | 2.6               | 3.5            | 4.6            | 4.0                | 4.4                | 2.7             | 3.8             | 2.4 |
| 219148_at    | PBK      | PDZ binding kinase                                                       | 0.000506686 | 0.0              | -0.1             | 0.1           | 1.5           | -0.2             | 0.6              | 2.9           | 2.3           | 1.9               | 1.5               | 3.7            | 4.9            | 3.2               | 4.3               | 3.3            | 4.5            | 3.6               | 1.7               | 3.2            | 4.8            | 4.0                | 4.9                | 3.5             | 3.8             | 3.3 |
| 201890_at    | RRM2     | ribonucleotide reductase M2 polypeptide                                  | 0.000345458 | 0.8              | 0.8              | 1.7           | 1.3           | 1.5              | 0.8              | 2.2           | 3.6           | 1.6               | 2.8               | 3.4            | 4.8            | 4.4               | 4.0               | 3.9            | 3.1            | 3.3               | 3.7               | 3.9            | 3.8            | 4.0                | 4.6                | 2.1             | 2.3             | 2.9 |
| 222680_s_at  | DTL      | denticleless homolog (Drosophila)                                        | 0.000628774 | 0.6              | 0.0              | 0.9           | 1.7           | -0.2             | 0.1              | 2.3           | 3.2           | 1.4               | 1.4               | 3.5            | 4.3            | 3.6               | 4.3               | 3.0            | 3.6            | 3.7               | 1.9               | 3.2            | 4.3            | 3.5                | 4.6                | 3.4             | 3.2             | 2.5 |
| 204444_at    | KIF11    | kinesin family member 11                                                 | 0.000808707 | 0.3              | 0.0              | 0.2           | 1.3           | -0.1             | -0.2             | 2.0           | 3.4           | 1.4               | 2.2               | 3.5            | 4.0            | 3.7               | 4.1               | 3.0            | 4.0            | 3.3               | 2.6               | 3.1            | 4.7            | 4.0                | 4.2                | 2.0             | 2.6             | 2.5 |
| 202589_at    | TYMS     | thymidylate synthetase                                                   | 0.000387781 | 0.8              | -0.2             | 1.2           | 2.0           | 1.1              | -0.1             | 2.1           | 3.6           | 1.8               | 3.1               | 3.4            | 5.0            | 4.2               | 4.2               | 3.6            | 3.1            | 2.9               | 3.6               | 3.6            | 3.9            | 4.1                | 4.0                | 1.9             | 2.1             | 2.7 |
| 201292_at    | TOP2A    | topoisomerase (DNA) II alpha 170kDa                                      | 0.000484828 | 0.4              | -0.4             | -0.2          | 1.0           | 0.0              | -0.1             | 1.9           | 3.2           | 1.9               | 2.6               | 3.4            | 3.7            | 2.9               | 3.8               | 2.8            | 3.4            | 4.2               | 2.5               | 3.2            | 4.2            | 3.7                | 4.6                | 2.6             | 2.8             | 2.5 |
| 203213_at    | CDC2     | cell division cycle 2, G1 to S and G2 to M                               | 0.000504302 | 0.7              | 0.1              | -0.2          | 1.0           | 1.4              | 1.2              | 1.9           | 3.1           | 1.6               | 2.4               | 3.1            | 4.6            | 3.3               | 4.1               | 2.6            | 3.6            | 3.5               | 3.4               | 3.5            | 4.2            | 4.0                | 3.9                | 1.9             | 2.4             | 2.9 |
| 202870_s_at  | CDC20    | CDC20 cell division cycle 20 homolog (S. cerevisiae)                     | 0.000360717 | -0.1             | -0.5             | 0.5           | 1.4           | -0.4             | 0.5              | 1.9           | 2.5           | 1.4               | 2.1               | 3.0            | 4.0            | 3.4               | 4.1               | 2.1            | 3.6            | 3.2               | 2.1               | 2.7            | 3.7            | 4.0                | 4.8                | 2.8             | 3.7             | 2.7 |
| 202705_at    | CCNB2    | cyclin B2                                                                | 0.000398993 | 0.0              | -0.2             | -0.3          | 0.5           | 0.3              | 0.7              | 2.3           | 3.0           | 1.3               | 2.1               | 3.1            | 3.8            | 3.7               | 4.1               | 2.7            | 3.1            | 3.4               | 2.3               | 2.7            | 4.3            | 4.2                | 4.1                | 2.6             | 3.4             | 2.2 |
| 205768_s_at  | SLC27A2  | solute carrier family 27 (fatty acid transporter), member 2              | 0.000390859 | 0.0              | -0.4             | -0.1          | 0.8           | 0.6              | 0.4              | 1.1           | 1.3           | 1.1               | 1.0               | 3.4            | 4.4            | 2.5               | 4.0               | 2.4            | 4.2            | 3.3               | 1.0               | 2.9            | 4.0            | 4.2                | 4.6                | 2.5             | 3.8             | 3.2 |
| 205394_at    | CHEK1    | CHK1 checkpoint homolog (S. pombe)                                       | 0.000855369 | 0.4              | -0.3             | 0.0           | 0.6           | -0.2             | 0.4              | 2.2           | 2.6           | 1.4               | 1.6               | 3.3            | 4.4            | 3.3               | 4.2               | 1.8            | 4.2            | 3.3               | 1.4               | 3.1            | 3.8            | 3.4                | 4.5                | 3.2             | 3.6             | 2.8 |
| 225655_at    | UHRF1    | ubiquitin-like, containing PHD and RING finger domains, 1                | 0.000173096 | 0.4              | -0.2             | 0.4           | 1.3           | -0.6             | 0.7              | 1.9           | 2.9           | 1.7               | 1.7               | 3.1            | 4.9            | 3.2               | 3.7               | 2.9            | 3.3            | 3.5               | 3.1               | 3.3            | 3.5            | 3.6                | 4.0                | 3.1             | 2.4             | 2.7 |
| 219306_at    | KIF15    | kinesin family member 15                                                 | 0.000935053 | -0.3             | 0.7              | -0.2          | 0.7           | -0.1             | 0.4              | 2.7           | 3.2           | 1.5               | 2.3               | 3.6            | 4.1            | 3.4               | 4.2               | 3.0            | 3.5            | 3.6               | 2.3               | 3.0            | 3.5            | 3.1                | 4.1                | 2.7             | 3.7             | 2.2 |
| 202503_s_at  | KIAA0101 | KIAA0101                                                                 | 0.00043743  | -0.7             | 0.7              | 0.2           | 1.5           | 0.0              | 0.1              | 1.6           | 3.3           | 1.4               | 3.1               | 3.0            | 5.1            | 3.7               | 4.1               | 4.8            | 2.3            | 2.6               | 3.5               | 3.3            | 3.8            | 4.2                | 3.7                | 1.7             | 1.7             | 2.4 |
| 219918_s_at  | ASPM     | asp (abnormal spindle)-like, microcephaly associated (Drosophila)        | 0.000625439 | 0.6              | 0.5              | 0.4           | 1.1           | -0.7             | 0.6              | 2.1           | 3.1           | 1.4               | 2.0               | 3.2            | 4.5            | 3.6               | 3.2               | 2.8            | 3.5            | 3.1               | 2.4               | 3.3            | 3.7            | 3.3                | 4.7                | 2.2             | 2.9             | 2.7 |
| 204026_s_at  | ZWINT    | ZW10 interactor                                                          | 0.000179478 | 0.5              | 0.5              | 0.5           | 1.0           | 1.4              | 1.4              | 1.7           | 2.6           | 1.2               | 1.8               | 3.1            | 4.0            | 2.7               | 3.5               | 3.7            | 2.8            | 3.2               | 3.5               | 2.7            | 4.3            | 3.6                | 3.7                | 2.0             | 2.2             | 2.9 |
| 209392_at    | ENPP2    | ectonucleotide pyrophosphatase/phosphodiesterase 2 (autotaxin)           | 0.005558575 | -0.3             | 0.0              | -0.3          | 0.5           | -0.3             | 0.3              | 2.6           | 1.1           | 0.4               | 0.3               | 3.1            | 5.2            | 4.3               | 0.8               | 1.1            | 0.5            | 1.7               | 4.3               | 3.6            | 3.4            | 4.7                | 4.4                | 4.7             | 1.3             | 6.0 |
| 205769_at    | SLC27A2  | solute carrier family 27 (fatty acid transporter), member 2              | 0.000440672 | 0.2              | -0.3             | 0.0           | 0.4           | 0.0              | 0.6              | 1.3           | 1.4           | 1.0               | 0.6               | 3.1            | 3.8            | 2.4               | 3.9               | 2.8            | 4.0            | 3.4               | 1.0               | 2.4            | 3.5            | 4.0                | 4.4                | 1.9             | 3.7             | 3.0 |
| 204146_at    | RAD51AP1 | RAD51 associated protein 1                                               | 0.000440052 | 1.0              | 0.7              | 0.9           | 1.4           | 1.6              | 0.5              | 1.6           | 2.4           | 1.1               | 1.8               | 2.9            | 3.3            | 3.2               | 2.9               | 3.3            | 3.6            | 3.5               | 3.2               | 2.0            | 4.7            | 3.1                | 3.0                | 1.9             | 2.6             | 3.0 |
| 204825_at    | MELK     | maternal embryonic leucine zipper kinase                                 | 0.000391422 | 0.4              | 0.5              | 0.8           | 1.9           | 0.6              | -0.5             | 1.9           | 2.9           | 1.2               | 2.0               | 3.1            | 4.2            | 3.5               | 3.6               | 2.9            | 3.0            | 3.1               | 2.5               | 2.7            | 4.2            | 3.6                | 3.9                | 1.8             | 2.3             | 2.6 |
| 202095_s_at  | BIRC5    | baculoviral IAP repeat-containing 5 (survivin)                           | 0.000560101 | 0.1              | 0.2              | 0.2           | 0.8           | -0.3             | 1.1              | 1.3           | 2.0           | 1.1               | 1.6               | 3.5            | 3.3            | 3.5               | 3.9               | 2.9            | 3.9            | 3.8               | 2.0               | 2.2            | 3.8            | 3.6                | 3.2                | 2.4             | 2.6             | 1.9 |
| 220651_s_at  | MCM10    | MCM10 minichromosome maintenance deficient 10 (S. cerevisiae)            | 0.000743536 | 0.0              | -1.0             | 0.0           | 0.5           | 0.2              | 0.5              | 1.8           | 2.9           | 1.6               | 1.5               | 3.6            | 4.2            | 3.6               | 3.9               | 2.5            | 3.9            | 2.9               | 1.2               | 2.8            | 3.3            | 2.8                | 4.0                | 2.9             | 3.3             | 2.2 |
| 203755_at    | BUB1B    | BUB1 budding uninhibited by benzimidazoles 1 homolog beta (yeast)        | 0.00043174  | 0.7              | 0.8              | 0.4           | 0.2           | -0.1             | -0.3             | 1.6           | 2.1           | 1.4               | 1.9               | 3.0            | 3.6            | 3.3               | 3.2               | 3.1            | 3.4            | 3.1               | 1.7               | 3.0            | 3.8            | 3.3                | 3.9                | 2.0             | 2.8             | 2.3 |
| 209642_at    | BUB1     | BUB1 budding uninhibited by benzimidazoles 1 homolog (yeast)             | 0.000335066 | -0.1             | -0.7             | 0.1           | 0.0           | 0.3              | 0.2              | 1.3           | 1.8           | 0.8               | 1.9               | 3.0            | 3.8            | 2.9               | 2.9               | 2.2            | 3.5            | 3.0               | 1.5               | 2.8            | 3.2            | 2.6                | 4.3                | 3.3             | 4.2             | 2.3 |
| 218883_s_at  | MLF1IP   | MLF1 interacting protein                                                 | 0.001183206 | 1.1              | -0.4             | 0.6           | 1.6           | 0.4              | 0.1              | 1.5           | 2.9           | 1.2               | 2.0               | 2.9            | 5.2            | 3.1               | 3.4               | 2.0            | 3.0            | 3.7               | 2.6               | 2.3            | 4.4            | 3.6                | 3.8                | 1.8             | 2.1             | 2.6 |
| 223381_at    | CDCA1    | cell division cycle associated 1                                         | 0.000426273 | -0.5             | -0.1             | 0.2           | 0.3           | 0.2              | 0.1              | 1.0           | 2.1           | 1.0               | 1.0               | 3.1            | 2.1            | 3.0               | 3.8               | 2.2            | 3.8            | 3.1               | 0.9               | 2.5            | 3.8            | 2.7                | 4.0                | 2.8             | 3.4             | 2.2 |
| 221521_s_at  | Pfs2     | NA                                                                       | 0.001074754 | 0.8              | -0.2             | -0.5          | 1.3           | -0.5             | 0.1              | 2.3           | 2.6           | 1.4               | 1.9               | 3.1            | 3.7            | 3.4               | 4.1               | 2.2            | 3.4            | 3.0               | 1.9               | 2.1            | 3.7            | 3.3                | 3.5                | 2.4             | 2.8             | 2.4 |
| 228033_at    | E2F7     | E2F transcription factor 7                                               | 0.001267566 | 0.4              | 0.1              | 0.3           | 0.9           | 0.3              | 0.4              | 2.1           | 2.4           | 1.4               | 1.1               | 3.2            | 3.6            | 2.2               | 3.4               | 2.7            | 3.8            | 3.8               | 1.3               | 2.5            | 3.9            | 3.0                | 3.5                | 2.9             | 3.0             | 2.2 |
| 210052_s_at  | TPX2     | TPX2, microtubule-associated, homolog (Xenopus laevis)                   | 0.000803009 | 0.6              | -0.3             | -0.7          | 0.4           | 0.3              | 0.1              | 0.9           | 2.1           | 1.3               | 1.7               | 2.8            | 3.5            | 2.6               | 3.7               | 2.2            | 3.4            | 3.0               | 1.6               | 2.7            | 3.0            | 2.9                | 3.6                | 1.8             | 4.1             | 2.0 |
| 212021_s_at  | MKI67    | antigen identified by monoclonal antibody Ki-67                          | 0.001018131 | -0.4             | 0.6              | 1.2           | 1.1           | -0.5             | 0.2              | 1.6           | 2.4           | 1.4               | 1.7               | 2.8            | 3.0            | 2.7               | 3.6               | 2.8            | 2.9            | 3.2               | 1.6               | 1.8            | 4.0            | 3.2                | 3.9                | 2.1             | 2.6             | 1.8 |
| 203560_at    | GGH      | gamma-glutamyl hydrolase (conjugase, folypolyglutammaglutamyl hydrolase) | 0.00058379  | -0.7             | 0.4              | -0.2          | 0.8           | -0.6             | -0.9             | 2.0           | 1.9           | 0.9               | 1.4               | 2.6            | 3.4            | 2.3               | 2.5               | 3.1            | 3.1            | 3.2               | 2.7               | 2.2            | 3.7            | 2.6                | 3.6                | 2.5             | 2.7             | 2.1 |
| 1554696_s_at | TYMS     | thymidylate synthetase                                                   | 0.001837299 | 0.3              | -0.4             | -0.7          | 1.7           | 0.2              | -0.1             | 0.5           | 2.2           | 1.1               | 1.2               | 3.6            | 3.8            | 2.9               | 4.2               | 2.1            | 3.8            | 3.2               | 1.8               | 2.8            | 3.1            | 3.3                | 3.3                | 1.4             | 2.8             | 1.4 |
| 209709_s_at  | HMMR     | hyaluronan-mediated motility receptor (RHAMM)                            | 0.000917669 | -0.2             | 0.2              | -0.4          | 0.6           | -0.2             | 0.4              | 1.6           | 1.8           | 0.7               | 1.4               | 3.1            | 3.0            | 3.1               | 3.3               | 2.5            | 3.4            | 2.3               | 1.0               | 2.0            | 3.3            | 2.7</              |                    |                 |                 |     |

|              |          |                                                                                                      |             |      |      |      |      |      |      |     |     |     |     |     |     |     |      |     |     |     |     |     |     |     |     |     |     |     |
|--------------|----------|------------------------------------------------------------------------------------------------------|-------------|------|------|------|------|------|------|-----|-----|-----|-----|-----|-----|-----|------|-----|-----|-----|-----|-----|-----|-----|-----|-----|-----|-----|
| 210559_s_at  | CDC2     | cell division cycle 2, G1 to S and G2 to M                                                           | 0.002906855 | 0.4  | 0.2  | 0.3  | 0.6  | 0.7  | -0.6 | 1.8 | 1.9 | 0.6 | 0.9 | 2.9 | 3.6 | 2.1 | 3.1  | 2.1 | 3.9 | 3.5 | 1.1 | 2.2 | 3.5 | 3.1 | 3.9 | 2.6 | 2.8 | 1.9 |
| 206102_at    | PSF1     | NA                                                                                                   | 0.000512553 | -1.6 | 0.2  | 0.9  | 0.7  | 0.1  | 0.0  | 1.5 | 2.7 | 1.0 | 1.2 | 3.2 | 4.7 | 2.7 | 2.9  | 2.1 | 2.7 | 3.3 | 1.5 | 2.1 | 3.0 | 3.5 | 3.9 | 2.1 | 3.4 | 2.3 |
| 209714_s_at  | CDKN3    | cyclin-dependent kinase inhibitor 3 (CDK2-associated dual specificity phosphatase)                   | 0.001836717 | -0.2 | 0.2  | -0.4 | 1.3  | 0.5  | 0.1  | 1.5 | 2.5 | 0.9 | 1.9 | 3.0 | 3.4 | 2.9 | 3.4  | 1.5 | 3.6 | 3.0 | 1.3 | 2.4 | 3.4 | 3.2 | 3.8 | 2.4 | 3.2 | 1.4 |
| 228069_at    | FAM54A   | family with sequence similarity 54, member A                                                         | 0.000682278 | 0.2  | 1.0  | -1.0 | 0.5  | 0.1  | 0.1  | 1.0 | 1.6 | 0.8 | 1.1 | 2.5 | 2.7 | 2.1 | 2.7  | 2.6 | 3.0 | 3.5 | 1.7 | 1.8 | 4.0 | 2.5 | 3.8 | 2.7 | 3.1 | 2.1 |
| 204962_s_at  | CENPA    | centromere protein A, 17kDa                                                                          | 0.000443504 | 0.0  | 0.0  | 0.4  | 0.5  | -0.3 | 0.1  | 1.8 | 2.5 | 0.9 | 1.3 | 2.9 | 2.9 | 2.8 | 2.6  | 2.4 | 3.3 | 2.8 | 1.4 | 2.5 | 2.9 | 2.2 | 3.5 | 3.2 | 3.6 | 2.1 |
| 205034_at    | CCNE2    | cyclin E2                                                                                            | 0.001265705 | 0.3  | 0.3  | 0.1  | 1.0  | -0.6 | -0.7 | 1.4 | 1.7 | 1.0 | 1.1 | 3.3 | 3.9 | 2.5 | 2.3  | 2.2 | 3.5 | 3.1 | 0.9 | 2.2 | 3.5 | 3.2 | 3.8 | 2.1 | 3.4 | 2.3 |
| 219990_at    | E2F8     | E2F transcription factor 8                                                                           | 0.001955979 | -0.1 | 0.4  | 0.0  | 0.4  | 0.0  | 0.1  | 1.5 | 2.9 | 1.0 | 1.3 | 3.3 | 3.9 | 2.5 | 3.6  | 2.3 | 3.4 | 2.3 | 0.4 | 2.7 | 3.3 | 2.6 | 4.0 | 2.8 | 3.2 | 2.1 |
| 1555758_a_at | CDKN3    | cyclin-dependent kinase inhibitor 3 (CDK2-associated dual specificity phosphatase)                   | 0.000921274 | -0.5 | -0.4 | -0.2 | 0.5  | 0.1  | -0.1 | 0.9 | 2.2 | 1.2 | 1.2 | 3.2 | 2.9 | 2.8 | 3.4  | 2.2 | 4.0 | 2.8 | 0.8 | 2.3 | 3.3 | 2.7 | 3.7 | 2.5 | 3.3 | 1.5 |
| 228323_at    | CASC5    | cancer susceptibility candidate 5                                                                    | 0.000336758 | 0.5  | -0.7 | 1.1  | 0.7  | 0.1  | 0.7  | 1.6 | 2.1 | 1.3 | 1.7 | 2.6 | 3.3 | 2.8 | 3.1  | 2.5 | 2.9 | 2.8 | 1.9 | 2.1 | 3.6 | 3.0 | 3.7 | 1.5 | 2.7 | 2.6 |
| 228729_at    | CCNB1    | cyclin B1                                                                                            | 0.000857631 | -0.3 | -0.8 | 0.4  | 0.1  | -1.0 | -0.4 | 2.0 | 2.0 | 0.6 | 1.1 | 3.3 | 3.1 | 2.7 | 2.9  | 2.3 | 3.6 | 2.8 | 0.9 | 2.6 | 2.9 | 3.0 | 3.7 | 2.1 | 4.2 | 1.3 |
| 226980_at    | DEPDC1B  | DEP domain containing 1B                                                                             | 0.004385442 | 0.0  | 0.2  | -0.2 | 0.5  | -0.1 | -0.1 | 1.4 | 2.4 | 0.7 | 0.8 | 3.2 | 2.9 | 2.6 | 2.8  | 2.0 | 4.2 | 3.2 | 0.8 | 2.1 | 3.4 | 2.5 | 3.6 | 2.5 | 3.8 | 1.4 |
| 236641_at    | KIF14    | kinesin family member 14                                                                             | 0.001419132 | 1.0  | -0.3 | 0.3  | 0.6  | -0.1 | 0.1  | 1.2 | 0.8 | 0.9 | 1.3 | 2.3 | 3.7 | 2.9 | 3.1  | 2.0 | 3.9 | 2.8 | 1.6 | 2.6 | 2.5 | 2.0 | 3.5 | 2.6 | 3.7 | 1.5 |
| 205909_at    | POLE2    | polymerase (DNA directed), epsilon 2 (p59 subunit)                                                   | 0.001310864 | 0.6  | -0.3 | 1.0  | 1.2  | -0.5 | 0.6  | 1.7 | 2.3 | 1.2 | 1.2 | 3.0 | 3.8 | 2.5 | 3.6  | 2.4 | 3.2 | 2.8 | 1.2 | 2.0 | 3.1 | 2.9 | 3.4 | 2.1 | 3.5 | 2.0 |
| 222036_s_at  | MCM4     | MCM4 minichromosome maintenance deficient 4 (S. cerevisiae)                                          | 0.000550412 | 0.0  | -0.6 | 0.4  | 1.5  | 0.2  | -0.4 | 0.4 | 2.2 | 1.5 | 1.8 | 3.1 | 3.3 | 2.7 | 3.5  | 2.5 | 3.0 | 2.8 | 1.9 | 2.0 | 4.0 | 2.6 | 3.7 | 1.6 | 2.2 | 2.1 |
| 223062_s_at  | PSAT1    | phosphoserine aminotransferase 1                                                                     | 0.000504571 | 0.3  | -0.8 | -0.3 | 0.9  | -0.1 | -0.5 | 1.2 | 1.3 | 0.6 | 0.6 | 2.8 | 2.7 | 2.0 | 2.6  | 3.1 | 3.3 | 2.3 | 0.5 | 2.3 | 3.2 | 3.4 | 3.6 | 2.1 | 3.3 | 2.5 |
| 209891_at    | SPBC25   | spindle pole body component 25 homolog (S. cerevisiae)                                               | 0.008699351 | 0.3  | 0.5  | 0.0  | 0.3  | 0.3  | 0.0  | 1.7 | 1.9 | 0.8 | 1.1 | 2.7 | 3.4 | 2.6 | 3.1  | 1.7 | 4.0 | 3.3 | 0.9 | 1.4 | 3.2 | 2.3 | 4.0 | 2.4 | 3.6 | 1.5 |
| 218662_s_at  | HCAP-G   | NA                                                                                                   | 0.00096649  | 0.1  | 1.1  | 0.6  | 0.6  | -0.5 | -0.3 | 1.7 | 2.3 | 0.9 | 1.5 | 2.7 | 3.1 | 2.7 | 3.4  | 1.5 | 3.2 | 2.5 | 1.7 | 2.2 | 3.1 | 3.1 | 3.5 | 1.9 | 3.1 | 2.4 |
| 203362_s_at  | MAD2L1   | MAD2 mitotic arrest deficient-like 1 (yeast)                                                         | 0.000871445 | 0.0  | 0.6  | -0.8 | 1.0  | -0.3 | -0.1 | 0.3 | 1.7 | 0.8 | 0.8 | 2.4 | 2.0 | 1.6 | 3.2  | 4.1 | 3.2 | 2.6 | 1.7 | 1.8 | 4.4 | 3.1 | 2.5 | 1.5 | 1.9 | 2.3 |
| 229305_at    | MLF1IP   | MLF1 interacting protein                                                                             | 0.00203952  | -0.1 | 0.6  | -0.3 | 1.0  | -0.3 | -0.1 | 0.5 | 2.7 | 1.4 | 1.4 | 2.8 | 3.9 | 2.2 | 3.8  | 1.9 | 3.5 | 3.9 | 1.6 | 1.4 | 3.6 | 2.8 | 3.1 | 1.8 | 2.2 | 2.0 |
| 212022_s_at  | MKI67    | antigen identified by monoclonal antibody Ki-67                                                      | 0.00125826  | 0.7  | 0.4  | -0.1 | 0.7  | 0.0  | -0.1 | 1.6 | 2.0 | 0.8 | 1.4 | 2.5 | 3.2 | 2.9 | 3.6  | 2.0 | 3.1 | 2.8 | 1.3 | 1.8 | 2.8 | 2.8 | 3.4 | 2.1 | 3.1 | 1.7 |
| 218009_s_at  | PRC1     | protein regulator of cytokinesis 1                                                                   | 0.001726014 | 1.3  | 0.9  | -0.2 | 0.5  | -0.3 | -0.1 | 1.6 | 2.2 | 0.8 | 1.2 | 2.5 | 2.7 | 2.3 | 2.9  | 2.0 | 3.4 | 2.9 | 1.7 | 2.6 | 3.2 | 3.0 | 3.9 | 1.3 | 2.2 | 1.9 |
| 222608_s_at  | ANLN     | anillin, actin binding protein (scraps homolog, Drosophila)                                          | 0.002380275 | 0.3  | 0.4  | 0.1  | -0.1 | -0.4 | -0.1 | 1.0 | 1.9 | 0.8 | 0.7 | 2.5 | 3.1 | 3.0 | 2.9  | 1.3 | 3.9 | 2.9 | 0.9 | 2.2 | 3.3 | 2.2 | 3.4 | 2.6 | 3.5 | 1.3 |
| 204822_at    | TTK      | TTK protein kinase                                                                                   | 0.002812918 | 0.1  | 0.0  | -0.1 | 0.8  | 0.2  | 0.6  | 1.5 | 2.5 | 0.7 | 1.4 | 3.1 | 3.3 | 2.1 | 1.9  | 1.7 | 3.6 | 2.9 | 0.7 | 2.2 | 3.4 | 2.8 | 3.9 | 2.4 | 3.8 | 1.9 |
| 206632_s_at  | APOBEC3B | apolipoprotein B mRNA editing enzyme, catalytic polypeptide-like 3B                                  | 0.00275001  | 0.1  | 0.0  | 0.4  | 1.6  | 0.6  | -0.2 | 1.8 | 3.0 | 1.0 | 1.5 | 2.5 | 3.0 | 3.4 | -0.3 | 0.8 | 4.3 | 3.6 | 2.2 | 2.4 | 3.3 | 2.2 | 4.1 | 2.0 | 2.9 | 2.4 |
| 218350_s_at  | GMNN     | germin, DNA replication inhibitor                                                                    | 0.001036168 | 1.0  | 0.8  | 0.1  | 0.8  | 1.4  | 0.4  | 1.3 | 1.8 | 1.0 | 1.1 | 2.4 | 2.4 | 2.3 | 2.3  | 2.5 | 2.8 | 2.7 | 2.3 | 2.0 | 4.0 | 3.3 | 3.1 | 1.5 | 2.2 | 2.0 |
| 224428_s_at  | CDCA7    | cell division cycle associated 7                                                                     | 0.001257701 | -0.4 | 0.4  | -0.6 | 1.2  | 1.4  | 0.8  | 0.8 | 2.5 | 1.3 | 2.1 | 3.0 | 4.6 | 3.0 | 3.7  | 3.6 | 2.8 | 2.3 | 2.0 | 2.1 | 2.9 | 3.5 | 3.4 | 0.7 | 1.3 | 1.6 |
| 203418_at    | CCNA2    | cyclin A2                                                                                            | 0.00145773  | -0.2 | -0.6 | 0.7  | 0.5  | 0.8  | -0.1 | 1.4 | 1.9 | 1.0 | 1.2 | 3.1 | 3.9 | 2.2 | 3.0  | 2.2 | 3.5 | 2.8 | 0.8 | 2.0 | 3.0 | 2.3 | 3.3 | 2.4 | 3.3 | 2.0 |
| 204170_s_at  | CKS2     | CDC28 protein kinase regulatory subunit 2                                                            | 0.000422178 | -1.8 | 0.6  | 0.0  | 0.7  | -0.9 | -0.6 | 1.5 | 1.4 | 0.2 | 1.7 | 1.7 | 2.2 | 2.0 | 1.9  | 3.6 | 2.6 | 2.8 | 2.3 | 2.1 | 3.2 | 3.7 | 3.1 | 1.3 | 2.4 | 1.6 |
| 218663_at    | HCAP-G   | NA                                                                                                   | 0.002675296 | 0.6  | 0.1  | 0.2  | 0.6  | -0.5 | 0.1  | 2.0 | 1.1 | 1.2 | 0.6 | 2.7 | 2.7 | 2.2 | 2.5  | 1.6 | 4.1 | 2.9 | 0.7 | 2.5 | 2.2 | 2.7 | 2.8 | 2.6 | 3.9 | 1.8 |
| 223556_at    | HELLS    | helicase, lymphoid-specific                                                                          | 0.000559386 | 0.5  | 0.2  | 0.3  | 0.2  | 0.6  | -0.4 | 0.6 | 1.6 | 0.3 | 1.0 | 2.9 | 2.9 | 1.8 | 3.1  | 2.4 | 2.8 | 2.8 | 1.1 | 2.0 | 3.6 | 2.9 | 3.7 | 1.5 | 2.5 | 2.2 |
| 204240_s_at  | SMC2L1   | SMC2 structural maintenance of chromosomes 2-like 1 (yeast)                                          | 0.001570119 | -0.2 | 0.9  | 0.1  | 0.5  | 0.7  | 0.2  | 1.2 | 1.8 | 0.5 | 1.3 | 2.0 | 2.3 | 1.8 | 3.1  | 2.6 | 2.6 | 2.6 | 1.6 | 1.7 | 4.1 | 2.8 | 2.9 | 1.9 | 2.4 | 1.8 |
| 205393_s_at  | CHEK1    | CHK1 checkpoint homolog (S. pombe)                                                                   | 0.001597267 | -0.2 | 0.0  | -0.1 | 0.7  | -0.1 | -0.1 | 1.0 | 1.4 | 0.9 | 1.1 | 2.3 | 3.4 | 2.5 | 3.0  | 1.0 | 3.5 | 2.8 | 1.4 | 2.5 | 3.0 | 2.2 | 3.2 | 2.2 | 3.4 | 0.9 |
| 222740_at    | ATAD2    | ATPase family, AAA domain containing 2                                                               | 0.000567095 | 1.2  | 0.6  | 0.8  | 0.5  | 1.0  | 0.4  | 1.3 | 2.1 | 0.7 | 0.9 | 2.6 | 2.5 | 1.9 | 2.9  | 3.4 | 2.7 | 2.2 | 1.9 | 1.5 | 3.9 | 3.2 | 3.3 | 1.2 | 1.9 | 1.8 |
| 201014_s_at  | PAICS    | phosphoribosylaminoimidazole carboxylase, phosphoribosylaminoimidazole succinocarboxamide synthetase | 0.001236157 | 0.6  | 1.0  | 0.4  | 0.6  | -0.5 | 0.8  | 0.5 | 1.1 | 0.7 | 0.7 | 2.2 | 2.1 | 1.7 | 2.5  | 1.8 | 2.5 | 2.7 | 1.8 | 2.1 | 4.2 | 2.8 | 2.7 | 2.3 | 2.7 | 1.9 |
| 202107_s_at  | MCM2     | MCM2 minichromosome maintenance deficient 2, mitotin (S. cerevisiae)                                 | 0.000866363 | -0.1 | 0.1  | -0.3 | 1.4  | 0.5  | -0.3 | 1.4 | 2.2 | 1.1 | 1.3 | 2.8 | 3.2 | 2.3 | 3.8  | 1.4 | 2.7 | 2.4 | 1.8 | 1.8 | 3.3 | 3.2 | 3.1 | 1.6 | 2.2 | 2.1 |
| 205024_s_at  | RAD51    | RAD51 homolog (RecA homolog, E. coli) (S. cerevisiae)                                                | 0.003741101 | 0.2  | 1.0  | 0.1  | 0.8  | 0.2  | -0.1 | 1.5 | 1.9 | 1.1 | 1.3 | 3.0 | 3.1 | 2.6 | 2.9  | 1.7 | 2.9 | 2.5 | 1.3 | 1.7 | 3.0 | 2.8 | 3.2 | 2.5 | 2.6 | 1.5 |
| 219000_s_at  | DCC1     | NA                                                                                                   | 0.00148201  | 0.2  | -1.2 | 0.2  | 0.1  | 0.4  | 0.5  | 1.6 | 1.1 | 0.5 | 0.3 | 2.5 | 2.1 | 2.2 | 2.7  | 1.8 | 3.2 | 2.9 | 0.3 | 1.7 | 2.9 | 2.6 | 3.0 | 2.1 | 4.0 | 1.5 |
| 219493_at    | SHCBP1   | SHC SH2-domain binding protein 1                                                                     | 0.000511035 | 0.2  | -0.5 | 0.3  | 0.4  | -0.1 | 0.1  | 1.3 | 1.3 | 0.6 | 1.3 | 2.5 | 2.6 | 2.3 | 2.4  | 1.7 | 3.2 | 2.6 | 1.1 | 1.6 | 2.6 | 2.1 | 3.6 | 2.4 | 3.4 | 1.8 |
| 207828_s_at  | CENPF    | centromere protein F, 350/400ka (mitosin)                                                            | 0.002097985 | 0.4  | 0.7  | 0.2  | 1.0  | 0.1  | 0.8  | 1.3 | 1.9 | 0.7 | 1.4 | 2.7 | 3.3 | 2.4 | 3.3  | 2.2 | 2.8 | 2.7 | 1.3 | 1.5 | 2.3 | 3.0 | 3.1 | 1.6 | 2.8 | 1.8 |
| 208079_s_at  | STK6     | serine/threonine kinase 6                                                                            | 0.002862325 | 0.7  | 0.6  | 0.6  | 0.3  | -0.2 | -0.4 | 2.1 | 1.4 | 0.6 | 0.6 | 1.6 | 3.0 | 2.6 | 2.3  | 1.0 | 2.7 | 2.3 | 1.8 | 2.0 | 3.1 | 2.7 | 3.4 | 2.1 | 3.3 | 1.3 |
| 204768_s_at  | FEN1     | flap structure-specific endonuclease 1                                                               | 0.003422132 | 0.6  | 0.2  | 0.2  | 0.9  | 0.8  | 0.5  | 0.6 | 2.0 | 0.7 | 1.1 | 2.4 | 2.6 | 2.3 | 3.1  | 1.3 | 3.2 | 2.6 | 1.5 | 2.1 | 3.0 | 2.3 | 2.8 | 1.7 | 2.7 | 1.9 |
| 213226_at    | EXOSC9   | exosome component 9                                                                                  | 0.000822653 | -0.1 | 0.0  | -0.9 | 1.0  | 0.4  | -0.5 | 1.7 | 1.6 | 0.7 | 1.2 | 2.5 | 2.6 | 2.2 | 2.8  | 2.6 | 2.9 | 2.4 | 1.1 | 1.9 | 3.3 | 2.2 | 3.3 | 1.3 | 2.4 | 2.1 |
| 219258_at    | FLJ20516 | NA                                                                                                   | 0.000615548 | -0.1 | -0.4 | -1.2 | 0.4  | 0.2  | -1.0 | 0.5 | 1.4 | 0.6 | 0.8 | 1.9 | 2.4 | 1.7 | 2.2  | 2.1 | 2.8 | 2.8 | 1.3 | 1.6 | 3.7 | 2.7 | 2.7 | 2.1 | 2.7 |     |

|              |           |                                                                                      |             |      |      |      |      |      |      |     |     |      |     |     |     |     |     |     |     |     |     |     |     |     |     |     |     |     |
|--------------|-----------|--------------------------------------------------------------------------------------|-------------|------|------|------|------|------|------|-----|-----|------|-----|-----|-----|-----|-----|-----|-----|-----|-----|-----|-----|-----|-----|-----|-----|-----|
| 224753_at    | CDCA5     | cell division cycle associated 5                                                     | 0.000554356 | -0.6 | -0.6 | 0.5  | 0.5  | -0.3 | 0.1  | 1.3 | 1.7 | 0.8  | 1.1 | 2.3 | 3.4 | 2.2 | 3.0 | 1.5 | 2.7 | 2.4 | 1.4 | 2.0 | 2.5 | 2.3 | 2.6 | 1.7 | 2.7 | 1.6 |
| 225520_at    | MTHFD1L   | methylenetetrahydrofolate dehydrogenase (NADP+ dependent) 1-like                     | 0.000173538 | 0.1  | -0.3 | -0.2 | 0.5  | -0.1 | 0.4  | 0.1 | 1.1 | 0.4  | 0.6 | 1.9 | 2.4 | 1.8 | 2.1 | 2.1 | 2.1 | 2.3 | 1.0 | 2.2 | 3.1 | 3.1 | 2.2 | 1.6 | 2.6 | 2.2 |
| 226661_at    | CDCA2     | cell division cycle associated 2                                                     | 0.007444254 | 0.4  | 0.0  | -0.6 | 0.8  | 0.5  | 0.0  | 0.7 | 1.7 | 0.8  | 1.0 | 2.9 | 2.6 | 2.1 | 2.3 | 1.3 | 3.6 | 2.7 | 0.7 | 1.6 | 2.6 | 1.6 | 3.1 | 2.3 | 3.6 | 0.9 |
| 210164_at    | GZMB      | granzyme B (granzyme 2, cytotoxic T-lymphocyte-associated serine esterase 1)         | 0.004479197 | 1.6  | 0.6  | 0.3  | 0.6  | 4.5  | 1.5  | 2.0 | 1.2 | 1.2  | 1.0 | 3.2 | 1.9 | 2.0 | 2.5 | 2.4 | 3.1 | 2.2 | 0.4 | 1.3 | 1.2 | 3.2 | 3.3 | 1.3 | 2.9 | 2.5 |
| 200783_s_at  | STMN1     | stathmin 1/oncoprotein 18                                                            | 0.002233007 | 0.6  | 0.8  | 0.1  | 0.9  | 0.9  | -0.5 | 0.9 | 2.2 | 0.7  | 1.1 | 2.5 | 2.7 | 2.0 | 3.3 | 2.5 | 2.5 | 2.5 | 1.8 | 1.3 | 2.7 | 2.8 | 2.0 | 1.1 | 1.7 | 2.0 |
| 225834_at    | LOC440687 | NA                                                                                   | 0.000684359 | -0.6 | -0.2 | 1.0  | 1.4  | -0.7 | 0.0  | 1.7 | 0.9 | 0.8  | 1.1 | 1.3 | 2.7 | 1.9 | 0.7 | 1.8 | 2.2 | 3.2 | 2.6 | 1.9 | 3.5 | 1.6 | 2.4 | 2.1 | 2.8 | 1.6 |
| 218875_s_at  | FBXO5     | F-box protein 5                                                                      | 0.002457801 | -0.1 | 0.5  | -0.4 | 0.9  | 1.2  | 0.6  | 0.9 | 1.4 | 0.7  | 0.7 | 2.1 | 2.1 | 1.3 | 2.2 | 2.7 | 2.6 | 3.0 | 1.6 | 1.2 | 3.2 | 2.8 | 2.4 | 1.6 | 2.0 | 1.5 |
| 208103_s_at  | ANP32E    | acidic (leucine-rich) nuclear phosphoprotein 32 family, member E                     | 0.004595121 | 0.5  | 0.4  | -0.8 | 0.5  | -0.5 | -0.4 | 0.8 | 1.3 | 0.8  | 1.0 | 1.8 | 1.7 | 1.9 | 2.8 | 3.4 | 2.4 | 2.8 | 1.1 | 1.1 | 3.1 | 2.1 | 2.1 | 1.6 | 1.9 | 1.5 |
| 218355_at    | KIF4A     | kinesin family member 4A                                                             | 0.004912846 | 0.1  | -0.6 | 0.8  | 0.3  | -0.5 | 0.4  | 1.0 | 1.5 | 0.7  | 0.5 | 1.9 | 3.1 | 1.8 | 3.3 | 1.3 | 3.0 | 2.0 | 0.7 | 1.7 | 2.7 | 1.9 | 3.0 | 1.9 | 3.7 | 0.5 |
| 204709_s_at  | KIF23     | kinesin family member 23                                                             | 0.008598149 | 0.2  | 0.2  | 0.3  | 0.5  | 0.0  | -0.3 | 1.4 | 1.3 | 0.7  | 0.6 | 1.7 | 2.7 | 1.9 | 1.5 | 1.1 | 3.0 | 2.9 | 0.9 | 2.0 | 3.2 | 2.1 | 2.3 | 1.9 | 3.6 | 1.2 |
| 204162_at    | KNTC2     | kinetochore associated 2                                                             | 0.000484134 | 0.5  | 0.6  | -1.4 | 0.1  | 1.1  | 0.3  | 0.4 | 2.0 | 0.4  | 0.9 | 2.7 | 2.5 | 2.1 | 3.1 | 2.4 | 3.0 | 2.4 | 1.1 | 1.5 | 2.3 | 2.8 | 2.8 | 0.5 | 1.6 | 2.1 |
| 232238_at    | ASPM      | asp (abnormal spindle)-like, microcephaly associated (Drosophila)                    | 0.00375038  | 0.3  | 0.4  | -0.1 | -0.2 | -0.6 | 0.4  | 1.3 | 1.8 | 0.4  | 0.7 | 1.8 | 1.9 | 1.2 | 2.5 | 1.2 | 2.9 | 3.1 | 0.7 | 1.4 | 2.9 | 1.9 | 3.2 | 2.1 | 3.0 | 1.2 |
| 226456_at    | MGC24665  | NA                                                                                   | 0.000335847 | -0.1 | 0.2  | 0.1  | 0.4  | 0.8  | -0.2 | 1.0 | 1.9 | 1.2  | 1.3 | 2.4 | 1.7 | 2.0 | 2.8 | 2.1 | 1.5 | 2.8 | 1.2 | 1.9 | 2.5 | 2.1 | 2.4 | 2.0 | 2.1 | 2.0 |
| 203968_s_at  | CDC6      | CDC6 cell division cycle 6 homolog (S. cerevisiae)                                   | 0.003276811 | -0.3 | 0.1  | -0.2 | 0.5  | -0.2 | -0.1 | 0.8 | 0.9 | 0.4  | 1.1 | 2.7 | 2.3 | 2.5 | 2.6 | 0.6 | 3.6 | 2.2 | 0.6 | 2.3 | 2.5 | 2.1 | 2.4 | 2.1 | 3.0 | 0.5 |
| 220085_at    | HELLS     | helicase, lymphoid-specific                                                          | 0.000925707 | 0.8  | 0.8  | -0.4 | 0.7  | 0.7  | 0.3  | 0.6 | 2.4 | -0.1 | 0.7 | 2.2 | 2.7 | 2.2 | 2.7 | 1.6 | 1.9 | 2.5 | 0.5 | 1.8 | 3.1 | 2.6 | 3.3 | 1.1 | 1.6 | 2.4 |
| 213008_at    | FLJ10719  | NA                                                                                   | 0.000943116 | 0.2  | 0.3  | 0.0  | 0.5  | 0.0  | 0.2  | 0.6 | 1.6 | 0.2  | 0.8 | 2.3 | 2.9 | 1.8 | 2.5 | 1.8 | 2.7 | 2.2 | 1.3 | 1.7 | 2.7 | 2.6 | 2.8 | 0.8 | 1.9 | 2.4 |
| 209408_at    | KIF2C     | kinesin family member 2C                                                             | 0.000503551 | -0.1 | 0.2  | -0.5 | 0.8  | -0.8 | 0.6  | 0.9 | 1.6 | 0.8  | 0.8 | 1.7 | 2.4 | 1.6 | 2.7 | 1.7 | 2.4 | 2.3 | 1.3 | 2.5 | 2.2 | 2.4 | 2.6 | 1.6 | 2.1 | 1.6 |
| 201202_at    | PCNA      | proliferating cell nuclear antigen                                                   | 0.001263863 | -0.5 | 1.4  | -1.0 | 0.6  | 1.1  | -0.3 | 1.1 | 1.8 | 0.8  | 1.0 | 2.0 | 2.0 | 1.7 | 2.3 | 4.2 | 2.4 | 1.9 | 1.5 | 1.4 | 2.4 | 2.4 | 2.4 | 1.1 | 1.5 | 1.5 |
| 219555_s_at  | BM039     | NA                                                                                   | 0.001047884 | -0.1 | -0.7 | -0.2 | 0.8  | -0.1 | 0.2  | 1.0 | 1.5 | 0.9  | 1.1 | 2.0 | 2.4 | 1.8 | 2.4 | 1.2 | 3.4 | 3.0 | 0.8 | 1.4 | 2.4 | 1.9 | 2.6 | 1.7 | 2.9 | 1.3 |
| 213523_at    | CCNE1     | cyclin E1                                                                            | 0.001906785 | 0.2  | 0.7  | -0.1 | 0.4  | 0.1  | 0.9  | 0.7 | 1.2 | 1.1  | 0.5 | 2.4 | 1.9 | 1.6 | 2.5 | 1.3 | 1.9 | 2.6 | 1.9 | 1.1 | 2.7 | 2.6 | 2.8 | 1.4 | 2.8 | 1.6 |
| 208002_s_at  | ACOT7     | acyl-CoA thioesterase 7                                                              | 0.000706439 | -0.9 | -0.3 | 0.6  | 0.5  | -0.5 | 0.4  | 0.3 | 1.8 | 0.7  | 1.0 | 2.4 | 2.7 | 1.6 | 2.8 | 0.6 | 3.1 | 2.6 | 1.5 | 1.7 | 2.6 | 2.7 | 3.0 | 0.9 | 1.7 | 2.0 |
| 225285_at    | BCAT1     | branched chain aminotransferase 1, cytosolic                                         | 0.000771874 | -1.0 | 0.1  | 0.6  | 0.7  | -0.1 | -1.0 | 1.2 | 0.3 | 1.1  | 1.6 | 0.1 | 1.7 | 1.5 | 0.2 | 1.0 | 1.5 | 3.0 | 3.2 | 1.1 | 3.6 | 1.3 | 2.7 | 3.1 | 3.7 | 0.7 |
| 223382_s_at  | ZNRF1     | zinc and ring finger 1                                                               | 4.654E-05   | -0.3 | -0.2 | 1.0  | 0.5  | 0.1  | 0.6  | 1.0 | 0.2 | 0.7  | 0.5 | 0.9 | 3.1 | 1.4 | 0.9 | 0.2 | 0.9 | 2.9 | 2.6 | 2.3 | 3.0 | 1.8 | 2.3 | 3.0 | 3.3 | 2.0 |
| 226936_at    | C6orf173  | chromosome 6 open reading frame 173                                                  | 0.003579145 | -0.7 | 0.2  | 0.4  | 0.8  | -1.1 | 0.2  | 1.6 | 1.2 | 0.8  | 1.3 | 1.8 | 2.6 | 1.8 | 1.7 | 0.7 | 2.4 | 3.3 | 1.4 | 0.8 | 3.6 | 1.6 | 2.8 | 2.5 | 2.9 | 0.9 |
| 227350_at    | NA        | NA                                                                                   | 0.002049989 | 0.9  | 0.1  | 0.7  | 0.2  | 0.9  | -0.2 | 0.2 | 2.1 | 0.3  | 0.8 | 2.5 | 1.8 | 1.8 | 3.1 | 2.3 | 2.2 | 2.1 | 0.2 | 1.7 | 2.8 | 2.0 | 2.5 | 1.2 | 2.1 | 2.2 |
| 222037_at    | MCM4      | MCM4 minichromosome maintenance deficient 4 (S. cerevisiae)                          | 0.00350161  | 0.1  | 0.1  | -0.1 | 0.7  | -0.1 | 0.3  | 0.2 | 1.6 | 0.7  | 1.2 | 2.8 | 2.7 | 2.2 | 3.1 | 1.0 | 3.0 | 2.4 | 0.7 | 1.7 | 2.2 | 1.8 | 2.5 | 1.6 | 2.6 | 1.2 |
| 235117_at    | ASB3      | ankyrin repeat and SOCS box-containing 3                                             | 0.001092469 | -0.3 | -0.3 | -0.1 | 0.0  | 0.4  | -0.1 | 1.2 | 1.2 | 0.3  | 0.0 | 2.1 | 1.8 | 1.1 | 1.4 | 2.6 | 2.7 | 1.3 | 0.2 | 1.5 | 2.8 | 2.6 | 2.8 | 1.5 | 3.4 | 1.9 |
| 202338_at    | TK1       | thymidine kinase 1, soluble                                                          | 0.002168592 | 0.2  | -0.5 | 0.3  | 0.5  | -0.7 | 0.0  | 1.2 | 2.0 | 0.4  | 1.2 | 1.7 | 2.5 | 1.7 | 2.7 | 1.8 | 2.5 | 2.8 | 1.0 | 1.6 | 2.6 | 2.3 | 2.1 | 1.0 | 2.1 | 1.4 |
| 212023_s_at  | MKI67     | antigen identified by monoclonal antibody Ki-67                                      | 0.007092728 | 1.1  | -0.3 | 0.1  | 0.5  | 0.6  | 0.0  | 1.1 | 0.9 | 0.4  | 0.9 | 1.6 | 1.6 | 1.3 | 3.8 | 0.8 | 3.1 | 2.5 | 1.2 | 1.0 | 2.8 | 1.8 | 2.2 | 0.9 | 2.9 | 1.4 |
| 204092_s_at  | STK6      | serine/threonine kinase 6                                                            | 0.003708764 | 0.4  | 0.1  | 0.3  | 0.1  | -0.4 | 0.0  | 1.3 | 1.2 | 0.4  | 0.6 | 1.6 | 2.3 | 1.8 | 2.1 | 2.0 | 2.9 | 1.5 | 1.3 | 1.8 | 2.7 | 1.6 | 2.7 | 1.4 | 3.2 | 0.6 |
| 226287_at    | NY-REN-41 | NA                                                                                   | 0.002422994 | 0.1  | 0.2  | -0.3 | 0.5  | -0.1 | 0.2  | 0.3 | 1.6 | -0.3 | 0.9 | 2.0 | 1.6 | 1.2 | 2.5 | 2.6 | 2.6 | 1.6 | 0.2 | 1.7 | 2.7 | 2.0 | 2.4 | 1.9 | 2.6 | 1.7 |
| 223307_at    | CDCA3     | cell division cycle associated 3                                                     | 0.001796275 | -0.4 | 0.7  | 0.1  | 0.3  | -0.3 | -1.0 | 1.4 | 1.5 | 0.6  | 1.2 | 2.0 | 2.2 | 2.0 | 2.4 | 1.5 | 2.2 | 1.8 | 1.1 | 1.7 | 2.1 | 2.0 | 2.3 | 2.3 | 2.7 | 1.4 |
| 218782_s_at  | ATAD2     | ATPase family, AAA domain containing 2                                               | 0.003760225 | 0.0  | 0.3  | 0.5  | 0.3  | 0.6  | 1.0  | 0.8 | 1.3 | 0.2  | 0.6 | 1.7 | 2.3 | 1.8 | 2.0 | 0.7 | 2.7 | 2.4 | 0.5 | 1.5 | 2.7 | 1.8 | 2.7 | 2.3 | 2.7 | 1.6 |
| 203358_s_at  | EZH2      | enhancer of zeste homolog 2 (Drosophila)                                             | 0.003727511 | 1.5  | 1.9  | 1.0  | 0.7  | 1.8  | 1.2  | 0.6 | 1.7 | 0.7  | 1.3 | 2.2 | 2.0 | 1.9 | 2.3 | 2.1 | 2.4 | 2.3 | 1.4 | 1.5 | 3.2 | 2.7 | 2.4 | 0.2 | 1.1 | 2.1 |
| 204531_s_at  | BRCA1     | breast cancer 1, early onset                                                         | 0.006198034 | -0.7 | 1.1  | 0.4  | 0.8  | 0.8  | 0.4  | 1.2 | 1.6 | 0.4  | 0.7 | 1.8 | 2.6 | 1.4 | 1.7 | 0.8 | 2.4 | 2.8 | 1.0 | 2.0 | 2.8 | 1.5 | 2.8 | 1.8 | 2.9 | 1.4 |
| 1554408_a_at | TK1       | thymidine kinase 1, soluble                                                          | 0.002699727 | 0.2  | 0.8  | -0.4 | 0.3  | 0.2  | -0.2 | 0.5 | 1.3 | 0.4  | 1.2 | 0.9 | 1.8 | 1.6 | 3.1 | 1.1 | 2.2 | 3.2 | 1.3 | 1.5 | 2.5 | 2.3 | 1.7 | 0.7 | 2.7 | 1.3 |
| 218741_at    | C22orf18  | chromosome 22 open reading frame 18                                                  | 0.002167868 | 0.9  | 0.1  | -0.2 | 0.5  | 0.2  | 0.1  | 0.9 | 1.7 | 1.0  | 1.4 | 2.2 | 2.0 | 2.1 | 3.1 | 1.4 | 2.6 | 1.9 | 0.5 | 1.9 | 2.5 | 1.7 | 2.6 | 1.3 | 2.3 | 1.2 |
| 201897_s_at  | CKS1B     | CDC28 protein kinase regulatory subunit 1B                                           | 0.001047451 | -0.4 | 0.6  | 0.0  | 0.6  | -0.4 | 0.8  | 0.9 | 1.5 | 0.8  | 0.8 | 1.8 | 1.9 | 1.4 | 1.9 | 1.1 | 2.5 | 2.7 | 1.6 | 1.1 | 2.6 | 2.3 | 2.7 | 1.4 | 2.1 | 1.6 |
| 203344_s_at  | RBBP8     | retinoblastoma binding protein 8                                                     | 0.00047826  | -0.7 | -0.2 | 0.6  | 0.7  | -0.2 | -0.5 | 1.7 | 0.7 | 0.6  | 1.4 | 1.1 | 2.8 | 1.9 | 1.1 | 1.1 | 1.8 | 2.6 | 2.6 | 1.2 | 3.3 | 1.8 | 2.4 | 1.8 | 2.5 | 0.9 |
| 230165_at    | SGOL2     | shugoshin-like 2 (S. pombe)                                                          | 0.000685764 | -0.1 | -0.2 | 0.7  | 0.0  | 0.1  | 0.3  | 0.5 | 1.0 | 0.4  | 0.5 | 2.2 | 2.4 | 1.7 | 1.2 | 1.8 | 2.6 | 1.8 | 0.9 | 1.2 | 2.4 | 2.1 | 2.8 | 1.7 | 3.2 | 1.6 |
| 222958_s_at  | DEPDC1    | DEP domain containing 1                                                              | 0.008634125 | 0.4  | -0.2 | 0.5  | 0.4  | -0.7 | 0.4  | 0.8 | 0.9 | 0.4  | 0.6 | 2.1 | 2.1 | 2.0 | 2.2 | 0.7 | 3.4 | 1.9 | 0.6 | 1.1 | 2.3 | 1.3 | 2.9 | 2.3 | 3.6 | 0.7 |
| 201663_s_at  | SMC4L1    | SMC4 structural maintenance of chromosomes 4-like 1 (yeast)                          | 0.002749799 | 0.0  | 0.6  | -1.0 | 1.1  | -1.2 | -0.1 | 0.5 | 1.5 | 0.2  | 0.8 | 1.9 | 1.9 | 1.3 | 1.6 | 1.8 | 2.4 | 2.6 | 1.6 | 1.3 | 2.7 | 1.9 | 3.1 | 0.8 | 2.1 | 1.7 |
| 225959_s_at  | ZNRF1     | zinc and ring finger 1                                                               | 0.000485093 | -1.6 | -1.2 | -1.0 | 0.5  | 0.8  | 3.7  | 1.4 | 0.1 | 0.9  | 0.3 | 1.0 | 2.8 | 1.5 | 0.4 | 1.0 | 0.7 | 2.6 | 2.3 | 2.3 | 2.4 | 1.7 | 2.2 | 2.3 | 3.2 | 2.1 |
| 203554_x_at  | PTTG1     | pituitary tumor-transforming 1                                                       | 0.001949125 | 0.0  | 0.2  | -0.2 | 0.6  | -0.2 | 0.2  | 1.3 | 1.6 | 0.8  | 1.1 | 2.5 | 2.6 | 2.0 | 3.0 | 1.7 | 2.8 | 2.3 | 0.7 | 1.2 | 2.1 | 2.4 | 2.8 | 0.8 | 1.8 | 1.3 |
| 209053_s_at  | WHSC1     | Wolf-Hirschhorn syndrome candidate 1                                                 | 0.001723023 | 0.9  | 0.1  | -0.1 | 0.6  | -0.5 | -0.1 | 0.0 | 1.4 | 0.8  | 1.1 | 2.0 | 1.7 | 1.4 | 2.5 | 1.5 | 2.4 | 2.9 | 1.4 | 0.9 | 2.8 | 1.9 | 2.2 | 1.0 | 2.0 | 1.6 |
| 1554572_a_at | SUV39H2   | suppressor of variegation 3-9 homolog 2 (Drosophila)                                 | 0.004081008 | 0.2  | 0.0  | 0.1  | 0.0  | -0.4 | 0.3  | 1.0 | 1.2 | 0.8  | 0.5 | 2.3 | 2.3 | 1.5 | 3.2 | 1.3 | 2.9 | 2.0 | 0.3 | 1.3 | 2.0 | 1.9 | 2.7 | 1.6 | 2.6 | 0.9 |
| 201930_at    | MCM6      | MCM6 minichromosome maintenance deficient 6 (MIS6 homolog, S. pombe) (S. cerevisiae) | 0.009250897 | 1.9  | 0.5  | -0.4 | 1.1  | 1.5  | 0.4  | 0.8 | 1.9 | 0.2  | 1.0 | 1.9 | 2.2 | 1.4 | 2.8 | 1.8 | 1.8 | 1.9 | 1.2 | 1.3 | 2.7 | 2.2 | 2.2 | 1.1 | 2.1 | 1.9 |
| 218349_s_at  | ZWILCH    | Zwilch, kinetochore associated, homolog (Drosophila)                                 | 0.003454916 | 0.0  | 0.8  | -0.7 | 0.4  | -0.2 | 0.1  | 0.7 | 1.4 | 0.1  | 0.5 | 2.0 | 2.2 | 1.3 | 2.1 | 1.8 | 2.5 | 2.2 | 0.1 | 1.3 | 2.5 | 2.1 | 2.7 | 1.4 | 2.6 | 1.7 |
| 238075_at    | NA        | NA                                                                                   | 0.00894746  |      |      |      |      |      |      |     |     |      |     |     |     |     |     |     |     |     |     |     |     |     |     |     |     |     |

|              |           |                                                                                     |             |      |      |      |      |      |      |      |     |     |      |     |     |     |     |      |     |     |     |     |     |     |     |     |     |     |
|--------------|-----------|-------------------------------------------------------------------------------------|-------------|------|------|------|------|------|------|------|-----|-----|------|-----|-----|-----|-----|------|-----|-----|-----|-----|-----|-----|-----|-----|-----|-----|
| 212141_at    | MCM4      | MCM4 minichromosome maintenance deficient 4 (S. cerevisiae)                         | 0.002237843 | -0.4 | 0.0  | 0.2  | 0.3  | 0.6  | 0.2  | 0.9  | 1.1 | 0.7 | 0.9  | 2.4 | 2.7 | 2.2 | 2.3 | 0.5  | 3.2 | 1.9 | 0.9 | 1.3 | 2.0 | 1.6 | 2.6 | 1.9 | 2.5 | 1.1 |
| 204127_at    | RFC3      | replication factor C (activator 1) 3, 38kDa                                         | 0.00375617  | -0.3 | 1.2  | -0.2 | 0.6  | 0.6  | 0.7  | 0.7  | 1.0 | 0.5 | 0.7  | 1.7 | 2.4 | 1.3 | 1.9 | 2.3  | 1.8 | 2.3 | 1.4 | 1.1 | 3.6 | 1.4 | 2.3 | 1.5 | 2.2 | 1.1 |
| 235609_at    | BRIP1     | BRCA1 interacting protein C-terminal helicase 1                                     | 0.003025186 | 0.2  | -0.4 | 0.5  | 0.3  | 0.5  | 0.2  | 1.2  | 1.9 | 0.4 | 0.9  | 2.4 | 2.5 | 2.6 | 2.5 | 2.2  | 2.9 | 2.0 | 0.8 | 1.3 | 1.5 | 1.2 | 2.4 | 0.8 | 2.5 | 1.2 |
| 206974_at    | CXCR6     | chemokine (C-X-C motif) receptor 6                                                  | 0.001365622 | -0.5 | 0.2  | 0.4  | -0.3 | -0.3 | 0.9  | 1.8  | 1.7 | 0.8 | -0.5 | 2.3 | 1.8 | 1.6 | 2.8 | 2.4  | 2.2 | 0.7 | 0.1 | 1.7 | 1.7 | 2.3 | 1.8 | 1.4 | 3.1 | 1.9 |
| 212281_s_at  | MAC30     | NA                                                                                  | 0.001094262 | -0.5 | -0.1 | -1.8 | 0.3  | 0.2  | 0.1  | 0.1  | 1.2 | 0.0 | 0.5  | 1.9 | 1.6 | 1.0 | 2.2 | 0.8  | 2.1 | 2.0 | 0.3 | 0.8 | 3.0 | 2.7 | 2.8 | 1.5 | 2.4 | 2.1 |
| 205436_s_at  | H2AFX     | H2A histone family, member X                                                        | 0.00687856  | -0.4 | 1.0  | -0.3 | 0.1  | 0.0  | -0.1 | 0.7  | 1.1 | 0.5 | 0.8  | 1.8 | 2.1 | 1.5 | 1.3 | 0.6  | 2.3 | 2.5 | 1.1 | 1.3 | 3.1 | 2.0 | 2.4 | 1.5 | 2.4 | 1.6 |
| 200832_s_at  | SCD       | stearyl-CoA desaturase (delta-9-desaturase)                                         | 0.001511382 | 0.4  | -0.1 | 1.1  | 1.0  | -0.2 | -0.2 | 0.0  | 0.7 | 0.6 | 0.4  | 1.7 | 2.3 | 1.3 | 2.5 | 1.1  | 2.3 | 2.2 | 0.9 | 1.7 | 2.5 | 1.7 | 1.9 | 1.6 | 2.2 | 1.6 |
| 229551_x_at  | ZNF367    | zinc finger protein 367                                                             | 0.001094658 | 1.3  | 0.8  | 0.6  | 0.7  | 1.8  | 0.0  | 0.1  | 1.9 | 0.6 | 0.2  | 2.3 | 1.7 | 1.3 | 2.1 | 2.6  | 1.6 | 2.1 | 0.9 | 1.3 | 2.9 | 1.5 | 2.5 | 0.8 | 1.1 | 2.3 |
| 204886_at    | PLK4      | polo-like kinase 4 (Drosophila)                                                     | 0.004180373 | 0.0  | 0.2  | -0.2 | 0.8  | -0.3 | 0.2  | 0.3  | 1.2 | 0.9 | 1.0  | 2.1 | 2.2 | 1.5 | 2.0 | 1.0  | 2.7 | 2.6 | 0.8 | 0.9 | 2.6 | 1.9 | 2.6 | 0.8 | 2.4 | 1.0 |
| 213454_at    | CORT      | cortistatin                                                                         | 0.000695036 | -0.5 | 0.5  | 0.4  | 0.3  | 0.1  | -0.1 | 0.7  | 1.5 | 0.5 | 0.9  | 1.7 | 2.1 | 1.6 | 2.4 | 1.7  | 2.3 | 1.4 | 0.8 | 1.5 | 1.9 | 1.8 | 2.1 | 1.6 | 2.3 | 1.6 |
| 219510_at    | POLQ      | polymerase (DNA directed), theta                                                    | 0.00224861  | 0.9  | -0.3 | 0.0  | 0.8  | 0.3  | 0.1  | 0.8  | 1.2 | 0.7 | 0.8  | 1.9 | 2.5 | 1.7 | 2.0 | 1.9  | 2.1 | 1.9 | 1.3 | 1.1 | 1.7 | 1.5 | 2.6 | 1.6 | 2.5 | 1.0 |
| 201714_at    | TUBG1     | tubulin, gamma 1                                                                    | 0.000626019 | -0.1 | -0.4 | -0.2 | 0.2  | 0.3  | 0.9  | 0.9  | 0.4 | 0.1 | 0.7  | 1.5 | 1.6 | 1.3 | 2.0 | 0.4  | 2.2 | 2.1 | 0.8 | 1.3 | 2.2 | 2.3 | 2.4 | 1.4 | 2.6 | 1.9 |
| 228361_at    | E2F2      | E2F transcription factor 2                                                          | 0.002991634 | -0.3 | -0.3 | 0.6  | 0.1  | 0.3  | 0.2  | 0.9  | 1.4 | 0.5 | 0.5  | 1.6 | 2.1 | 1.4 | 1.9 | 0.6  | 1.6 | 2.6 | 1.7 | 0.7 | 2.2 | 2.0 | 2.5 | 1.6 | 2.8 | 1.3 |
| 222039_at    | LOC146909 | NA                                                                                  | 0.002017699 | 0.5  | 0.0  | 0.4  | 0.7  | 0.3  | 0.3  | 1.1  | 1.3 | 0.6 | 1.0  | 2.0 | 2.0 | 1.9 | 2.4 | 1.9  | 1.8 | 1.7 | 1.5 | 1.2 | 2.0 | 1.4 | 2.7 | 1.3 | 2.3 | 0.8 |
| 202580_x_at  | FOXM1     | forkhead box M1                                                                     | 0.008164063 | -0.3 | 0.5  | 0.4  | 0.8  | 0.0  | -0.2 | 0.6  | 1.1 | 0.3 | 0.6  | 1.5 | 3.1 | 1.5 | 1.7 | 1.1  | 2.6 | 2.2 | 1.3 | 1.3 | 2.7 | 2.5 | 2.0 | 0.7 | 2.4 | 0.8 |
| 203145_at    | SPAG5     | sperm associated antigen 5                                                          | 0.001271199 | -0.4 | -0.6 | -0.5 | 0.3  | -0.7 | -0.4 | 0.7  | 1.2 | 0.2 | 0.4  | 1.3 | 2.4 | 1.3 | 2.0 | 1.0  | 2.2 | 1.9 | 1.1 | 1.4 | 2.1 | 1.6 | 2.4 | 1.3 | 3.1 | 1.1 |
| 204023_at    | RFC4      | replication factor C (activator 1) 4, 37kDa                                         | 0.003415462 | 0.5  | 1.5  | -0.6 | 0.3  | 1.1  | 0.5  | 0.5  | 1.3 | 0.3 | 0.2  | 2.0 | 1.6 | 1.3 | 2.3 | 1.4  | 2.2 | 1.8 | 0.5 | 0.8 | 2.6 | 2.1 | 2.4 | 1.5 | 2.1 | 1.5 |
| 226517_at    | BCAT1     | branched chain aminotransferase 1, cytosolic                                        | 0.001643697 | -1.6 | 0.4  | 0.9  | 1.6  | -1.3 | -1.4 | 1.8  | 0.2 | 1.5 | 1.6  | 0.1 | 1.7 | 1.2 | 0.2 | 1.0  | 1.2 | 2.3 | 2.3 | 0.9 | 2.5 | 1.2 | 2.8 | 2.8 | 3.5 | 0.7 |
| 201577_at    | NME1      | non-metastatic cells 1, protein (NM23A) expressed in                                | 0.000774185 | -1.0 | 0.1  | -0.5 | 0.0  | -0.2 | 0.4  | 0.3  | 0.7 | 0.8 | 0.6  | 1.2 | 1.9 | 1.2 | 1.9 | 0.8  | 2.0 | 1.8 | 1.1 | 1.6 | 2.7 | 2.2 | 2.4 | 1.6 | 2.1 | 1.1 |
| 203046_s_at  | TIMELESS  | timeless homolog (Drosophila)                                                       | 0.002965918 | -0.1 | 0.1  | -0.5 | 0.6  | 0.9  | 0.8  | 0.7  | 1.7 | 1.1 | 1.0  | 2.0 | 2.0 | 2.0 | 2.1 | 1.4  | 2.1 | 2.1 | 0.9 | 1.3 | 2.0 | 1.7 | 2.1 | 1.0 | 2.2 | 1.6 |
| 212481_s_at  | TPM3      | tropomyosin 3                                                                       | 0.00179387  | -0.8 | 0.0  | 0.4  | 0.7  | 1.3  | -0.2 | 1.0  | 1.0 | 0.7 | 0.6  | 1.2 | 2.5 | 1.6 | 1.5 | 0.2  | 2.0 | 2.2 | 1.1 | 1.5 | 2.7 | 1.7 | 1.8 | 1.8 | 2.1 | 2.0 |
| 242890_at    | HELLS     | helicase, lymphoid-specific                                                         | 0.001956415 | 0.0  | -0.2 | 0.6  | 0.2  | 0.4  | 0.1  | 0.7  | 0.9 | 0.3 | 0.7  | 1.9 | 1.7 | 1.4 | 1.6 | 1.3  | 2.2 | 2.4 | 0.8 | 1.2 | 2.5 | 1.4 | 3.0 | 0.9 | 2.0 | 1.2 |
| 212949_at    | BRRN1     | barren homolog (Drosophila)                                                         | 0.005565762 | 0.1  | 0.6  | 0.2  | 0.3  | -0.1 | 0.3  | 1.0  | 1.2 | 0.8 | 0.6  | 1.8 | 2.3 | 1.3 | 2.2 | 1.1  | 2.6 | 2.1 | 0.7 | 1.3 | 2.2 | 1.5 | 1.7 | 1.1 | 2.6 | 1.3 |
| 219588_s_at  | LUZP5     | leucine zipper protein 5                                                            | 0.00254477  | 0.5  | 0.6  | 0.3  | 0.3  | 0.2  | 0.3  | 0.7  | 1.7 | 0.6 | 0.8  | 1.7 | 2.4 | 1.7 | 1.9 | 1.5  | 2.7 | 1.8 | 0.8 | 1.5 | 1.5 | 1.8 | 2.0 | 1.0 | 1.7 | 1.7 |
| 204887_s_at  | PLK4      | polo-like kinase 4 (Drosophila)                                                     | 0.002045026 | 0.3  | -0.4 | 0.1  | 0.4  | 0.0  | 0.0  | 1.1  | 1.2 | 0.4 | 0.8  | 1.9 | 2.0 | 1.4 | 2.0 | 1.6  | 2.4 | 1.8 | 0.7 | 0.7 | 2.3 | 1.7 | 2.2 | 1.1 | 2.6 | 1.3 |
| 203967_at    | CDC6      | CDC6 cell division cycle 6 homolog (S. cerevisiae)                                  | 0.008167871 | -0.4 | 0.4  | -0.1 | 0.4  | -0.2 | 0.1  | 0.4  | 0.5 | 0.6 | 0.1  | 2.5 | 2.2 | 1.6 | 2.5 | 0.8  | 3.1 | 1.4 | 0.5 | 1.2 | 0.9 | 1.4 | 2.6 | 1.7 | 3.3 | 0.8 |
| 227165_at    | C13orf3   | chromosome 13 open reading frame 3                                                  | 0.002909623 | 0.0  | -0.2 | -0.1 | 1.0  | 0.9  | 0.7  | 1.3  | 1.0 | 0.4 | 0.9  | 1.7 | 2.4 | 1.1 | 2.4 | 1.6  | 2.3 | 1.6 | 0.8 | 1.5 | 1.9 | 1.4 | 2.1 | 1.1 | 2.7 | 1.0 |
| 206486_at    | LAG3      | lymphocyte-activation gene 3                                                        | 0.001513928 | 0.6  | 0.8  | -1.1 | 0.3  | 1.0  | 1.2  | 0.6  | 1.0 | 0.4 | 0.0  | 1.9 | 1.6 | 1.4 | 2.6 | 1.2  | 2.5 | 2.0 | 0.2 | 1.3 | 1.3 | 2.4 | 1.4 | 1.2 | 1.7 | 2.4 |
| 205376_at    | INPP4B    | inositol polyphosphate-4-phosphatase, type II, 105kDa                               | 0.002793464 | 1.0  | 1.2  | -0.8 | 0.1  | 0.7  | 0.2  | -0.5 | 1.4 | 0.2 | 0.2  | 2.2 | 1.3 | 1.0 | 3.9 | 1.3  | 2.4 | 1.2 | 0.2 | 1.1 | 2.1 | 1.9 | 2.2 | 0.9 | 1.1 | 2.4 |
| 210439_at    | ICOS      | inducible T-cell co-stimulator                                                      | 0.008899344 | 1.5  | -0.1 | -0.4 | 0.0  | 2.7  | 0.8  | -0.5 | 1.3 | 0.2 | 0.0  | 2.3 | 1.4 | 1.1 | 3.6 | 2.0  | 1.9 | 1.8 | 0.5 | 1.4 | 2.1 | 2.9 | 1.0 | 0.4 | 0.0 | 2.8 |
| 208955_at    | DUT       | dUTP pyrophosphatase                                                                | 0.0018691   | -0.8 | 0.7  | -1.1 | 0.6  | 1.3  | 1.2  | 0.3  | 1.3 | 0.6 | 0.5  | 2.0 | 1.8 | 1.1 | 2.7 | 1.2  | 2.0 | 2.2 | 0.9 | 1.4 | 2.2 | 1.8 | 1.6 | 1.3 | 1.6 | 1.6 |
| 223274_at    | TCF19     | transcription factor 19 (SC1)                                                       | 0.001800816 | 0.6  | -1.0 | 0.3  | 0.2  | -0.6 | 0.2  | 0.8  | 1.7 | 0.1 | 0.5  | 2.1 | 2.0 | 1.0 | 2.3 | 1.6  | 2.2 | 1.7 | 0.9 | 0.8 | 2.0 | 2.1 | 1.8 | 1.2 | 2.1 | 1.7 |
| 202534_x_at  | DHFR      | dihydrofolate reductase                                                             | 0.000389393 | -0.5 | -0.1 | -0.2 | 0.4  | 0.9  | 0.3  | 0.7  | 1.7 | 0.2 | 0.7  | 2.0 | 2.0 | 1.3 | 2.2 | 3.2  | 1.8 | 1.5 | 1.0 | 0.9 | 2.1 | 1.4 | 1.8 | 1.0 | 1.7 | 1.3 |
| 202468_s_at  | CTNNA1    | catenin (cadherin-associated protein), alpha-like 1                                 | 0.002917179 | -0.1 | 0.3  | 0.1  | 0.3  | 0.6  | 0.1  | 0.4  | 1.7 | 0.9 | 0.6  | 2.4 | 1.9 | 1.5 | 2.5 | 0.7  | 1.6 | 2.1 | 1.0 | 1.6 | 2.3 | 2.0 | 2.0 | 1.0 | 2.2 | 0.8 |
| 38158_at     | ESPL1     | extra spindle poles like 1 (S. cerevisiae)                                          | 0.001001897 | -0.1 | 0.3  | 0.1  | 0.2  | -0.2 | 0.4  | 0.7  | 1.0 | 0.5 | 0.7  | 1.6 | 2.3 | 1.0 | 1.7 | 1.6  | 2.1 | 2.0 | 1.0 | 1.1 | 1.9 | 1.8 | 1.9 | 1.5 | 2.4 | 1.3 |
| 222077_s_at  | RACGAP1   | Rac GTPase activating protein 1                                                     | 0.001372515 | -0.5 | 0.0  | 0.1  | 0.4  | 0.1  | -0.4 | 1.0  | 1.6 | 0.2 | 0.3  | 1.6 | 2.3 | 1.4 | 1.7 | 2.9  | 2.2 | 1.8 | 0.9 | 1.0 | 1.9 | 1.6 | 2.0 | 1.0 | 1.8 | 1.1 |
| 45633_at     | FLJ13912  | NA                                                                                  | 0.007098673 | 0.3  | 0.1  | 0.4  | 0.6  | 0.3  | 0.0  | 1.1  | 0.9 | 0.5 | 0.2  | 1.8 | 1.8 | 1.6 | 1.6 | 0.9  | 2.5 | 2.0 | 0.4 | 1.2 | 1.7 | 1.1 | 2.1 | 1.6 | 2.8 | 1.5 |
| 201830_s_at  | NET1      | neuroepithelial cell transforming gene 1                                            | 0.007092673 | -0.6 | -0.3 | -0.6 | 0.5  | -1.4 | -0.2 | -0.3 | 0.5 | 0.0 | 0.4  | 1.3 | 1.9 | 0.8 | 2.0 | 0.6  | 2.3 | 2.2 | 0.6 | 1.4 | 2.0 | 1.8 | 2.3 | 1.4 | 2.9 | 0.9 |
| 211714_x_at  | TUBB      | tubulin, beta polypeptide                                                           | 0.00573696  | -0.7 | -0.1 | -0.7 | 0.3  | -0.4 | -0.4 | 0.2  | 0.9 | 0.2 | 0.8  | 1.5 | 2.0 | 1.1 | 1.9 | -0.3 | 2.2 | 1.7 | 1.3 | 1.6 | 2.4 | 1.9 | 2.2 | 1.1 | 1.9 | 1.9 |
| 221677_s_at  | DONSON    | downstream neighbor of SON                                                          | 0.003558464 | -0.3 | -0.1 | 0.1  | 0.4  | 0.6  | 0.1  | 0.1  | 1.3 | 0.4 | 0.5  | 1.7 | 1.3 | 1.3 | 1.9 | 0.8  | 2.5 | 1.8 | 0.5 | 1.6 | 2.1 | 1.4 | 2.0 | 1.4 | 2.3 | 1.2 |
| 1555274_a_at | SELI      | NA                                                                                  | 0.00392176  | 0.7  | 0.1  | 0.0  | 0.4  | -0.7 | -0.1 | 0.2  | 0.5 | 0.6 | 0.3  | 1.0 | 1.4 | 0.8 | 2.6 | 1.2  | 2.1 | 2.5 | 0.4 | 0.9 | 2.7 | 2.0 | 1.5 | 1.6 | 1.4 | 1.1 |
| 225686_at    | FAM33A    | family with sequence similarity 33, member A                                        | 0.002503509 | 0.2  | 0.0  | 0.2  | 0.3  | 0.0  | -0.1 | 0.6  | 1.0 | 0.4 | 1.0  | 1.9 | 1.7 | 1.6 | 2.5 | 1.9  | 2.7 | 1.8 | 0.9 | 1.3 | 1.7 | 1.3 | 1.7 | 0.8 | 1.7 | 0.8 |
| 222777_s_at  | WHSC1     | Wolf-Hirschhorn syndrome candidate 1                                                | 0.00382407  | 0.6  | -0.8 | -1.1 | 0.9  | 1.1  | 0.0  | 0.1  | 1.1 | 0.5 | 0.7  | 1.7 | 1.9 | 1.3 | 2.9 | 0.9  | 2.3 | 2.5 | 0.7 | 1.4 | 1.9 | 1.2 | 2.2 | 1.1 | 1.6 | 0.4 |
| 213253_at    | SMC2L1    | SMC2 structural maintenance of chromosomes 2-like 1 (yeast)                         | 0.008821169 | 0.1  | 0.3  | 0.2  | 0.9  | -0.2 | 0.5  | 0.9  | 1.4 | 0.3 | 0.4  | 1.9 | 1.4 | 1.4 | 1.3 | 1.4  | 2.1 | 2.0 | 0.2 | 1.2 | 2.8 | 1.4 | 1.9 | 1.2 | 2.3 | 1.4 |
| 204558_at    | RAD54L    | RAD54-like (S. cerevisiae)                                                          | 0.004089217 | -0.5 | -0.1 | 0.8  | 0.3  | 0.1  | 1.2  | 0.8  | 1.1 | 0.3 | 0.4  | 1.1 | 2.1 | 0.9 | 1.8 | 1.3  | 2.1 | 1.5 | 1.3 | 1.0 | 1.8 | 1.8 | 2.0 | 1.0 | 3.1 | 0.7 |
| 201755_at    | MCM5      | MCM5 minichromosome maintenance deficient 5, cell division cycle 46 (S. cerevisiae) | 0.003479846 | -0.2 | -0.5 | -0.4 | 0.6  | 0.2  | 0.0  | 1.0  | 0.6 | 0.5 | 1.0  | 1.2 | 2.2 | 1.4 | 1.7 | -0.3 | 2.1 | 2.2 | 1.4 | 0.9 | 2.9 | 1.6 | 1.9 | 1.1 | 1.7 | 1.5 |
| 234464_s_at  | EME1      | essential meiotic endonuclease 1 homolog 1 (S. pombe)                               | 0.000439423 | -0.5 | -0.2 | -0.3 | 0.8  | 0.2  | -0.3 | 0.6  | 0.5 | 0.8 | 0.2  | 1.2 | 2.0 | 1.3 | 1.5 | 0.5  | 1.6 | 1.9 | 1.2 | 1.2 | 2.4 | 1.5 | 2.0 | 1.8 | 2.4 | 1.1 |
| 217755_at    | HN1       | hematological and neurological expressed 1                                          | 0.002427772 | 0.3  | 0.2  | -0.5 | 0.4  | 0.4  | 0.4  | 0.9  | 0.5 | 0.3 | 0.9  | 0.9 | 1.7 | 1.2 | 1.2 | 0.0  | 1.9 | 2.2 | 1.4 | 1.2 | 2.7 | 2.0 | 1.8 | 1.0 | 2.0 | 1.4 |
| 226319_s_at  | THOC4     | THO complex 4                                                                       | 0.006109661 | 0.4  | 0.3  | -0.5 | 0.   |      |      |      |     |     |      |     |     |     |     |      |     |     |     |     |     |     |     |     |     |     |

|              |             |                                                                                                                                          |             |      |      |      |      |      |      |      |      |      |     |     |     |     |     |      |      |     |      |     |     |     |     |      |     |     |
|--------------|-------------|------------------------------------------------------------------------------------------------------------------------------------------|-------------|------|------|------|------|------|------|------|------|------|-----|-----|-----|-----|-----|------|------|-----|------|-----|-----|-----|-----|------|-----|-----|
| 201761_at    | MTHFD2      | methylenetetrahydrofolate dehydrogenase (NADP+ dependent) 2, methylenetetrahydrofolate cyclohydrolase                                    | 0.000279439 | -1.0 | 0.2  | -0.1 | 0.8  | 2.1  | 0.7  | 1.1  | -0.1 | 0.5  | 0.8 | 0.3 | 2.1 | 1.2 | 0.4 | 1.8  | 0.7  | 2.4 | 2.6  | 1.2 | 2.2 | 1.3 | 1.7 | 1.6  | 1.6 | 1.0 |
| 204159_at    | CDKN2C      | cyclin-dependent kinase inhibitor 2C (p18, inhibits CDK4)                                                                                | 0.000766077 | -0.3 | -0.4 | -0.1 | 0.3  | -0.5 | 0.0  | 0.6  | 1.0  | 0.4  | 1.2 | 1.2 | 1.6 | 1.4 | 1.7 | 1.8  | 1.8  | 2.8 | 1.1  | 1.1 | 3.0 | 0.9 | 1.0 | 0.8  | 1.4 | 1.0 |
| 200806_s_at  | HSPD1       | heat shock 60kDa protein 1 (chaperonin)                                                                                                  | 0.000372547 | -0.3 | -0.3 | -0.5 | 0.1  | -0.9 | -0.4 | 0.4  | 0.7  | -0.2 | 0.1 | 1.3 | 1.6 | 0.9 | 1.1 | 0.5  | 1.9  | 1.5 | 0.4  | 1.6 | 2.5 | 2.0 | 1.9 | 1.2  | 2.5 | 1.6 |
| 202309_at    | MTHFD1      | methylenetetrahydrofolate dehydrogenase (NADP+ dependent) 1, methylenetetrahydrofolate cyclohydrolase, formyltetrahydrofolate synthetase | 0.002128876 | -0.3 | -0.9 | -0.1 | 0.3  | -0.1 | -0.2 | 0.7  | 1.0  | 0.5  | 0.7 | 1.3 | 1.9 | 1.1 | 2.2 | 0.8  | 1.8  | 1.9 | 1.2  | 1.1 | 2.5 | 1.8 | 1.8 | 1.2  | 1.6 | 0.8 |
| 222402_at    | C13orf12    | chromosome 13 open reading frame 12                                                                                                      | 0.00026348  | -1.1 | -0.1 | 0.0  | 0.4  | -0.3 | 0.4  | 1.3  | -0.2 | 0.3  | 0.5 | 0.4 | 1.7 | 0.8 | 0.6 | 2.4  | 1.4  | 1.7 | 1.9  | 0.6 | 2.3 | 1.9 | 1.7 | 1.7  | 2.1 | 0.5 |
| 202069_s_at  | IDH3A       | isocitrate dehydrogenase 3 (NAD+) alpha                                                                                                  | 0.000563351 | -0.6 | 0.7  | 0.1  | 0.9  | 0.3  | 1.0  | 1.1  | -0.1 | 0.2  | 0.4 | 0.5 | 1.2 | 0.6 | 0.3 | 1.6  | 0.7  | 2.2 | 1.6  | 1.3 | 3.1 | 1.0 | 1.6 | 1.7  | 2.3 | 1.4 |
| 222500_at    | PP1L1       | peptidylprolyl isomerase (cyclophilin)-like 1                                                                                            | 0.003281824 | 0.4  | 0.9  | -0.9 | -0.3 | 0.3  | -0.9 | 0.2  | 0.8  | 0.2  | 0.0 | 1.1 | 0.9 | 0.9 | 1.3 | 2.2  | 1.7  | 1.3 | 0.0  | 1.1 | 1.9 | 2.0 | 1.6 | 1.4  | 2.6 | 1.3 |
| 217777_s_at  | HSPC121     | NA                                                                                                                                       | 0.006570993 | 0.3  | 0.5  | -0.6 | 0.6  | -0.8 | -0.1 | 0.9  | 0.7  | 0.5  | 0.4 | 1.4 | 1.1 | 0.8 | 1.4 | 1.6  | 2.4  | 1.6 | 0.3  | 1.3 | 2.2 | 1.9 | 2.2 | 0.6  | 1.8 | 1.4 |
| 213092_x_at  | MRPS16      | mitochondrial ribosomal protein S16                                                                                                      | 0.002068205 | 0.0  | -0.2 | -0.9 | -0.1 | 1.0  | 0.3  | 0.1  | 1.3  | 0.5  | 0.4 | 1.8 | 1.6 | 1.1 | 2.2 | 1.1  | 1.9  | 1.5 | 0.6  | 0.8 | 2.2 | 1.7 | 1.9 | 1.4  | 1.7 | 1.3 |
| 48808_at     | DHFR        | dihydrofolate reductase                                                                                                                  | 0.001045072 | 0.1  | 0.1  | -0.1 | 0.3  | 0.1  | 0.4  | 0.4  | 1.4  | 0.0  | 0.5 | 2.1 | 2.3 | 1.3 | 1.9 | 1.4  | 1.9  | 1.6 | 1.2  | 1.2 | 2.2 | 1.3 | 1.6 | 1.0  | 1.5 | 1.2 |
| 201476_s_at  | RRM1        | ribonucleotide reductase M1 polypeptide                                                                                                  | 0.002810389 | 0.4  | -0.2 | -1.0 | 0.0  | -1.1 | 0.4  | 0.4  | 1.1  | 0.5  | 0.4 | 1.7 | 1.2 | 1.1 | 1.7 | 1.0  | 2.7  | 1.6 | 0.7  | 1.4 | 1.8 | 1.1 | 1.5 | 1.0  | 2.4 | 1.2 |
| 221685_s_at  | FLJ20364    | NA                                                                                                                                       | 0.001142373 | -0.3 | 0.2  | 0.4  | 0.2  | 0.9  | 0.3  | 0.6  | 0.7  | 0.1  | 0.0 | 1.7 | 0.5 | 0.6 | 1.6 | 1.0  | 1.9  | 1.8 | 0.2  | 0.8 | 2.4 | 1.7 | 1.8 | 1.2  | 2.8 | 1.4 |
| 222154_s_at  | DNAPT6      | NA                                                                                                                                       | 0.003349845 | -0.6 | 0.5  | -1.7 | 0.7  | -0.9 | 0.6  | 0.7  | 0.7  | -0.2 | 0.1 | 0.5 | 2.3 | 1.4 | 1.6 | 1.0  | 1.3  | 1.8 | 1.1  | 0.7 | 2.1 | 1.8 | 1.8 | 0.9  | 2.2 | 1.5 |
| 155698_a_at  | LOC285513   | NA                                                                                                                                       | 0.002323694 | 0.3  | -0.1 | -0.6 | 0.3  | -0.3 | 0.3  | 0.7  | 0.6  | 0.6  | 0.5 | 1.9 | 1.7 | 1.5 | 2.0 | 1.5  | 2.0  | 1.6 | 0.3  | 1.7 | 0.6 | 1.1 | 1.6 | 1.1  | 1.8 | 2.3 |
| 228559_at    | NA          | NA                                                                                                                                       | 0.00285918  | 0.2  | -0.2 | 0.4  | 0.0  | -0.1 | -0.6 | 1.0  | 0.9  | 0.0  | 0.8 | 1.5 | 2.0 | 1.3 | 2.1 | 1.0  | 2.2  | 1.5 | 0.7  | 1.2 | 1.6 | 1.1 | 1.8 | 1.2  | 2.8 | 0.8 |
| 202886_s_at  | PPP2R1B     | protein phosphatase 2 (formerly 2A), regulatory subunit A (PR 65), beta isoform                                                          | 0.002422219 | 0.0  | 0.0  | 0.3  | -0.3 | -0.7 | 0.5  | 0.7  | 0.6  | 0.4  | 0.5 | 1.6 | 2.0 | 1.3 | 1.9 | 1.3  | 1.9  | 1.5 | 0.2  | 1.1 | 1.2 | 1.3 | 2.2 | 1.4  | 2.6 | 1.1 |
| 203405_at    | DSCR2       | Down syndrome critical region gene 2                                                                                                     | 0.000508344 | 0.1  | -0.4 | 0.3  | 0.2  | 0.4  | 0.1  | 0.5  | 0.7  | 0.1  | 0.3 | 1.2 | 1.6 | 0.9 | 1.0 | 3.0  | 1.7  | 1.3 | 0.8  | 0.8 | 2.7 | 1.2 | 1.7 | 0.9  | 2.0 | 1.0 |
| 242939_at    | TFDP1       | transcription factor Dp-1                                                                                                                | 0.00423533  | 0.5  | 0.4  | -0.3 | 0.6  | 0.2  | 0.3  | 0.2  | 0.6  | 0.6  | 0.8 | 0.9 | 1.8 | 1.1 | 1.8 | 0.9  | 2.1  | 2.2 | 1.0  | 1.1 | 2.5 | 1.7 | 1.4 | 1.1  | 1.3 | 0.7 |
| 234944_s_at  | FAM54A      | family with sequence similarity 54, member A                                                                                             | 0.001834909 | -0.2 | 0.0  | 0.1  | 0.1  | 0.0  | 0.2  | 0.8  | 1.1  | 0.3  | 0.0 | 1.3 | 1.3 | 0.9 | 1.3 | 0.5  | 2.2  | 1.7 | 0.5  | 0.7 | 1.3 | 1.6 | 2.6 | 1.5  | 2.6 | 1.5 |
| 203432_at    | TMPO        | thymopoietin                                                                                                                             | 0.000706999 | -0.4 | 0.3  | 0.1  | 0.4  | 1.2  | -1.0 | 0.6  | 0.4  | 0.2  | 0.8 | 0.6 | 1.5 | 0.7 | 1.2 | 1.2  | 1.6  | 2.1 | 1.3  | 0.8 | 3.0 | 1.1 | 1.5 | 1.3  | 2.0 | 1.0 |
| 205085_at    | ORC1L       | origin recognition complex, subunit 1-like (yeast)                                                                                       | 0.007423189 | 0.1  | -0.2 | -0.1 | 0.4  | 0.1  | -0.1 | 0.5  | 0.6  | 0.6  | 0.7 | 1.8 | 1.7 | 0.9 | 2.5 | 1.2  | 2.7  | 1.6 | 0.3  | 0.9 | 1.3 | 0.9 | 1.5 | 0.6  | 3.4 | 0.9 |
| 223700_at    | GAJ         | NA                                                                                                                                       | 0.009923674 | 0.0  | 0.1  | -0.4 | 0.0  | -0.2 | -0.2 | 0.7  | 0.8  | 0.9  | 0.7 | 2.2 | 1.9 | 1.8 | 1.1 | 0.6  | 3.2  | 0.9 | 0.2  | 1.4 | 1.5 | 0.6 | 2.5 | 1.3  | 2.9 | 0.8 |
| 215629_s_at  | KIAA1799    | NA                                                                                                                                       | 0.002426175 | -0.3 | 0.8  | 0.6  | 0.6  | 0.3  | 0.6  | 0.1  | 0.8  | 0.8  | 0.5 | 1.4 | 1.1 | 1.5 | 1.3 | 2.7  | 2.3  | 1.7 | 0.8  | 0.7 | 2.2 | 0.8 | 1.1 | 0.6  | 1.6 | 1.6 |
| 200615_s_at  | AP2B1       | adaptor-related protein complex 2, beta 1 subunit                                                                                        | 0.002462582 | -0.2 | -0.1 | -0.3 | 1.0  | -0.2 | 0.5  | 0.8  | 0.2  | 0.2  | 0.5 | 0.4 | 2.2 | 1.0 | 1.5 | 0.2  | 1.4  | 1.5 | 1.1  | 0.9 | 3.1 | 1.7 | 1.6 | 1.1  | 2.0 | 1.4 |
| 213088_s_at  | DNAJC9      | DnaJ (Hsp40) homolog, subfamily C, member 9                                                                                              | 0.002150635 | -0.6 | 0.5  | -1.2 | 0.1  | 1.8  | -0.5 | 0.1  | 1.2  | 0.4  | 0.5 | 1.8 | 1.1 | 1.1 | 2.4 | 1.6  | 1.9  | 1.5 | 0.2  | 0.8 | 2.2 | 1.6 | 1.6 | 0.7  | 1.6 | 1.5 |
| 231772_x_at  | CENPH       | centromere protein H                                                                                                                     | 0.001265493 | 0.4  | -0.7 | -0.1 | 0.4  | 0.0  | 0.0  | 0.2  | 1.0  | 0.6  | 0.9 | 1.9 | 1.5 | 1.6 | 2.2 | 1.5  | 2.1  | 1.8 | 0.6  | 1.0 | 1.9 | 1.2 | 1.0 | 0.6  | 1.9 | 1.1 |
| 204510_at    | CDC7        | CDC7 cell division cycle 7 (S. cerevisiae)                                                                                               | 0.002874976 | 0.5  | 1.2  | 0.2  | 0.0  | 0.8  | 0.7  | 0.5  | 1.5  | 0.6  | 0.1 | 1.6 | 0.5 | 1.0 | 2.0 | 3.5  | 2.0  | 1.1 | -0.2 | 0.8 | 1.4 | 1.7 | 1.9 | 0.2  | 1.2 | 1.8 |
| 227212_s_at  | PHF19       | PHD finger protein 19                                                                                                                    | 0.009813728 | -0.3 | -0.2 | -1.3 | 0.6  | 0.2  | 0.0  | 0.9  | 0.7  | 0.6  | 0.6 | 1.3 | 1.6 | 1.0 | 1.6 | 0.3  | 1.7  | 2.0 | 1.2  | 1.0 | 2.2 | 1.5 | 1.7 | 0.8  | 2.1 | 1.3 |
| 226694_at    | PALM2-AKAP2 | NA                                                                                                                                       | 0.005749339 | 0.8  | -0.3 | -0.2 | 0.5  | 0.5  | -0.5 | 0.5  | 1.2  | 0.0  | 1.2 | 1.7 | 2.3 | 1.8 | 2.0 | 1.5  | 1.6  | 1.6 | 0.5  | 0.9 | 1.3 | 1.7 | 2.5 | -0.1 | 0.9 | 2.2 |
| 212282_at    | MAC30       | NA                                                                                                                                       | 0.004231731 | 0.3  | 0.2  | -0.2 | 0.8  | 0.3  | 0.5  | 0.2  | 1.1  | 0.2  | 0.5 | 1.3 | 1.3 | 1.0 | 2.0 | 0.6  | 1.8  | 1.4 | 0.0  | 0.7 | 2.2 | 1.8 | 2.2 | 1.3  | 2.1 | 1.4 |
| 204728_s_at  | WDHD1       | WD repeat and HMG-box DNA binding protein 1                                                                                              | 0.008680525 | -0.2 | 0.1  | 0.6  | -0.3 | 0.1  | 0.1  | 0.2  | 0.9  | 0.2  | 0.3 | 1.7 | 1.7 | 1.4 | 1.7 | 1.7  | 2.8  | 1.4 | 0.4  | 0.9 | 1.0 | 0.9 | 1.5 | 1.4  | 2.6 | 0.6 |
| 227478_at    | SETBP1      | SET binding protein 1                                                                                                                    | 0.002749911 | 0.6  | 0.4  | -0.6 | -0.6 | 0.9  | -0.3 | 2.0  | 0.8  | 0.8  | 0.9 | 2.2 | 2.5 | 2.2 | 1.3 | 1.4  | 1.3  | 1.7 | 0.8  | 0.7 | 1.4 | 1.3 | 1.8 | 1.3  | 1.4 | 1.8 |
| 209825_s_at  | UCK2        | uridine-cytidine kinase 2                                                                                                                | 0.003618914 | 0.2  | -0.3 | -0.4 | 0.2  | -0.7 | 0.5  | 0.4  | 0.5  | 0.5  | 0.2 | 1.3 | 1.3 | 1.1 | 1.3 | 0.3  | 2.1  | 1.4 | 0.5  | 0.7 | 2.1 | 1.7 | 2.1 | 1.6  | 2.7 | 0.7 |
| 209507_at    | RPA3        | replication protein A3, 14kDa                                                                                                            | 0.006979976 | 0.0  | 0.2  | -0.4 | 0.4  | 0.6  | 0.2  | 0.8  | 0.8  | 0.8  | 0.4 | 1.5 | 1.2 | 1.1 | 2.1 | 1.0  | 2.4  | 1.7 | 0.6  | 0.8 | 1.8 | 1.8 | 1.6 | 0.9  | 1.5 | 1.0 |
| 203276_at    | LMNB1       | lamin B1                                                                                                                                 | 0.000320533 | -0.7 | -0.2 | -0.3 | 0.4  | -0.2 | 0.3  | 0.9  | -0.1 | -0.2 | 0.7 | 0.7 | 1.6 | 1.0 | 1.0 | -0.4 | 1.3  | 2.0 | 1.8  | 1.5 | 1.9 | 1.1 | 2.0 | 1.7  | 2.6 | 0.8 |
| 1554768_a_at | MAD2L1      | MAD2 mitotic arrest deficient-like 1 (yeast)                                                                                             | 0.009467545 | 0.0  | 0.1  | -0.3 | 0.3  | -0.1 | -0.2 | 0.7  | 1.2  | 0.7  | 0.5 | 2.6 | 1.0 | 1.6 | 1.0 | 1.1  | 3.4  | 1.1 | 0.4  | 1.2 | 1.4 | 0.9 | 1.6 | 1.4  | 2.4 | 0.7 |
| 201664_at    | SMC4L1      | SMC4 structural maintenance of chromosomes 4-like 1 (yeast)                                                                              | 0.002609889 | 0.3  | 1.7  | 0.2  | 0.5  | 1.2  | -0.6 | 0.4  | 1.1  | 0.1  | 0.6 | 1.5 | 1.6 | 1.1 | 1.6 | 1.7  | 1.7  | 1.7 | 0.6  | 0.9 | 1.9 | 1.7 | 1.8 | 0.5  | 1.6 | 1.3 |
| 205692_s_at  | CD38        | CD38 antigen (p45)                                                                                                                       | 0.007072048 | -0.2 | -0.1 | 0.1  | 1.3  | -0.3 | 0.5  | 1.3  | 1.5  | -0.2 | 1.5 | 1.2 | 1.8 | 1.2 | 1.0 | 0.1  | 2.7  | 1.6 | 1.5  | 0.9 | 2.4 | 1.4 | 2.2 | 0.6  | 1.3 | 1.4 |
| 208791_at    | CLU         | clusterin (complement lysis inhibitor, SP-40, 40, sulfated glycoprotein 2, testosterone-repressed prostate message 2, apolipoprotein J)  | 0.008853436 | -0.6 | 0.7  | 0.0  | 0.4  | 0.2  | -0.2 | -0.3 | -0.2 | 0.0  | 0.5 | 2.1 | 1.4 | 1.2 | 1.5 | -0.9 | -2.2 | 2.0 | 3.2  | 2.3 | 2.8 | 0.2 | 1.0 | 1.5  | 3.4 | 2.1 |
| 228468_at    | MASTL       | microtubule associated serine/threonine kinase-like                                                                                      | 0.001833404 | 0.4  | 0.5  | -0.4 | 0.0  | -0.5 | -0.4 | 0.5  | 0.8  | 0.5  | 0.4 | 0.8 | 0.5 | 0.8 | 1.2 | 1.9  | 1.6  | 1.9 | 1.1  | 1.0 | 2.7 | 0.8 | 1.2 | 1.1  | 1.8 | 0.9 |
| 204817_at    | ESPL1       | extra spindle poles like 1 (S. cerevisiae)                                                                                               | 0.001535675 | 0.4  | 0.1  | 0.0  | 0.0  | -0.1 | 0.4  | 0.4  | 1.0  | 0.6  | 0.6 | 1.3 | 1.4 | 1.6 | 1.5 | 1.4  | 2.2  | 1.2 | 1.2  | 1.2 | 1.6 | 0.9 | 1.0 | 0.8  | 2.5 | 1.0 |
| 211519_s_at  | KIF2C       | kinesin family member 2C                                                                                                                 | 0.002043771 | -0.1 | -0.3 | 0.5  | 0.2  | 0.4  | -0.1 | 0.5  | 0.8  | 0.4  | 0.1 | 0.8 | 1.2 | 1.0 | 1.2 | 0.9  | 2.5  | 1.8 | 0.8  | 0.9 | 1.4 | 1.0 | 1.8 | 0.7  | 3.0 | 0.9 |
| 238462_at    | STS-1       | NA                                                                                                                                       | 0.003805382 | 0.1  | 0.7  | -0.1 | 0.0  | 0.1  | 0.4  | 1.0  | 1.1  | 0.7  | 0.5 | 1.0 | 0.9 | 1.5 | 1.2 | 1.5  | 0.3  | 0.7 | 1.7  | 1   |     |     |     |      |     |     |

|             |           |                                                                                                                            |             |      |      |      |      |      |      |      |      |      |      |      |      |     |     |      |      |     |      |     |     |     |     |     |     |      |
|-------------|-----------|----------------------------------------------------------------------------------------------------------------------------|-------------|------|------|------|------|------|------|------|------|------|------|------|------|-----|-----|------|------|-----|------|-----|-----|-----|-----|-----|-----|------|
| 203960_s_at | C1orf41   | chromosome 1 open reading frame 41                                                                                         | 0.008793181 | 0.9  | 0.3  | 0.2  | 0.3  | -0.1 | 0.5  | 0.5  | 0.7  | 0.7  | 0.9  | 1.6  | 2.3  | 1.2 | 1.1 | 1.1  | 2.8  | 1.4 | 1.2  | 1.0 | 2.1 | 1.7 | 1.3 | 0.4 | 1.6 | 0.9  |
| 218073_s_at | TMEM48    | transmembrane protein 48                                                                                                   | 0.004216947 | 0.1  | 0.7  | -0.3 | 0.1  | -0.1 | 0.0  | 0.5  | 1.1  | 0.3  | 0.2  | 1.1  | 0.5  | 1.3 | 1.0 | 0.8  | 1.7  | 1.7 | 0.4  | 0.9 | 2.0 | 1.5 | 1.9 | 1.5 | 2.3 | 0.9  |
| 213646_x_at | K-ALPHA-1 | NA                                                                                                                         | 0.001870799 | -1.1 | 0.3  | -0.4 | 0.6  | 0.5  | -0.3 | 1.3  | 0.8  | 0.4  | 0.8  | 1.0  | 1.4  | 1.2 | 1.2 | 0.1  | 1.6  | 1.5 | 1.4  | 1.2 | 1.9 | 1.6 | 1.6 | 1.4 | 1.7 | 1.3  |
| 212320_at   | TUBB      | tubulin, beta polypeptide                                                                                                  | 0.002466281 | -1.7 | 0.2  | -1.0 | 0.0  | 2.7  | -0.7 | 0.7  | 1.0  | 0.2  | 0.6  | 1.3  | 2.2  | 1.0 | 1.5 | 1.2  | 1.6  | 1.4 | 1.0  | 1.3 | 1.5 | 1.6 | 1.5 | 0.9 | 1.5 | 1.4  |
| 219159_s_at | SLAMF7    | SLAM family member 7                                                                                                       | 0.001323831 | -0.4 | 0.2  | 0.1  | 0.3  | -0.9 | 0.5  | 1.6  | 0.6  | 0.0  | -0.5 | 1.8  | 1.1  | 1.3 | 1.9 | 0.7  | 2.4  | 0.7 | 0.2  | 0.1 | 1.2 | 2.3 | 2.7 | 0.0 | 0.9 | 2.9  |
| 231577_s_at | GBP1      | guanylate binding protein 1, interferon-inducible, 67kDa                                                                   | 0.00431454  | -0.8 | 0.4  | -1.3 | 0.3  | 1.2  | -0.1 | 1.2  | 0.7  | 0.2  | 0.0  | 1.4  | 2.1  | 1.1 | 1.6 | 2.3  | 1.2  | 1.2 | 1.7  | 1.6 | 0.4 | 2.4 | 1.7 | 0.5 | 0.3 | 1.3  |
| 222192_s_at | FLJ21820  | NA                                                                                                                         | 0.001861826 | 0.4  | -0.3 | -0.1 | 0.8  | -0.5 | -0.1 | 0.3  | 0.7  | 0.1  | 0.1  | 0.8  | 0.6  | 0.7 | 1.4 | 2.2  | 1.7  | 1.1 | -0.2 | 1.0 | 2.1 | 1.7 | 1.5 | 0.5 | 1.9 | 1.6  |
| 218493_at   | C16orf33  | chromosome 16 open reading frame 33                                                                                        | 0.002577407 | -0.5 | -0.8 | -0.8 | 0.3  | 0.2  | -0.6 | 1.2  | 0.4  | 0.6  | 0.3  | 0.9  | 0.8  | 0.9 | 1.0 | -0.1 | 1.8  | 1.8 | 1.3  | 1.3 | 3.0 | 1.3 | 1.4 | 1.1 | 1.6 | 0.8  |
| 206316_s_at | KNTC1     | kinetochore associated 1                                                                                                   | 0.005123178 | 0.4  | 0.1  | 0.5  | 0.6  | 0.5  | 1.0  | 0.3  | 1.3  | 0.5  | 0.4  | 1.6  | 1.4  | 1.1 | 1.6 | 0.6  | 1.7  | 1.7 | 0.7  | 0.4 | 2.1 | 1.1 | 1.8 | 1.0 | 1.9 | 1.5  |
| 201111_at   | CSE1L     | CSE1 chromosome segregation 1-like (yeast)                                                                                 | 0.001831697 | 0.0  | -0.2 | 0.4  | 0.4  | 0.1  | 0.2  | 1.2  | 0.6  | -0.2 | -0.2 | 1.1  | 1.2  | 0.8 | 0.5 | 2.2  | 1.2  | 1.3 | 0.8  | 0.9 | 1.7 | 1.8 | 1.7 | 1.4 | 2.3 | 0.6  |
| 209911_x_at | HIST1H2BD | histone 1, H2bd                                                                                                            | 0.001960426 | 0.1  | -0.3 | -0.1 | 0.7  | -0.2 | 0.2  | 0.9  | 1.1  | 0.3  | 0.5  | 2.4  | 1.4  | 1.6 | 1.5 | 0.7  | 1.1  | 1.5 | 0.7  | 1.1 | 1.7 | 1.1 | 1.9 | 1.2 | 1.2 | 1.8  |
| 211072_x_at | K-ALPHA-1 | NA                                                                                                                         | 0.003617325 | -1.0 | 0.7  | -0.7 | 0.5  | 0.9  | -0.5 | 1.1  | 0.8  | 0.4  | 0.7  | 1.1  | 1.4  | 1.2 | 1.2 | 0.3  | 1.4  | 1.4 | 1.4  | 1.1 | 1.8 | 1.4 | 1.6 | 1.3 | 1.7 | 1.3  |
| 218156_s_at | FLJ10534  | NA                                                                                                                         | 0.001090471 | -0.7 | 0.1  | -1.0 | 1.0  | -0.2 | 0.5  | -0.2 | 0.2  | 0.4  | 0.0  | 0.5  | 1.1  | 0.8 | 0.7 | 1.4  | 1.5  | 1.2 | 1.0  | 1.0 | 2.1 | 1.4 | 1.6 | 1.1 | 2.0 | 1.2  |
| 218049_s_at | MRPL13    | mitochondrial ribosomal protein L13                                                                                        | 0.006628611 | -0.2 | -0.1 | 0.1  | 0.3  | -1.0 | 0.1  | 1.4  | 0.6  | 0.2  | 0.5  | 0.8  | 1.3  | 0.9 | 1.0 | 0.3  | 1.9  | 2.0 | 0.9  | 0.9 | 2.5 | 1.6 | 1.4 | 1.3 | 1.8 | 0.7  |
| 202532_s_at | DHFR      | dihydrofolate reductase                                                                                                    | 0.003838161 | 0.2  | 0.0  | 0.0  | 0.3  | 0.0  | 0.3  | 0.9  | 1.3  | 0.6  | 0.3  | 2.3  | 1.2  | 1.1 | 1.7 | 1.2  | 1.7  | 1.4 | 0.7  | 1.1 | 1.7 | 0.9 | 1.5 | 1.1 | 2.3 | 0.4  |
| 202330_s_at | UNG       | uracil-DNA glycosylase                                                                                                     | 0.00281218  | -0.2 | 0.0  | 0.3  | 0.0  | 0.9  | 0.5  | 0.3  | 1.4  | 0.3  | 0.2  | 1.7  | 1.2  | 1.1 | 2.1 | 0.9  | 1.7  | 1.4 | 0.0  | 1.1 | 1.8 | 1.7 | 1.7 | 0.6 | 1.6 | 1.3  |
| 200987_x_at | PSME3     | proteasome (prosome, macropain) activator subunit 3 (PA28 gamma; Ki)                                                       | 0.000438067 | -0.9 | -0.8 | -0.7 | 0.4  | 0.7  | 0.2  | 0.9  | 0.4  | 0.2  | 0.8  | 0.6  | 1.6  | 0.9 | 0.8 | -0.4 | 1.6  | 2.1 | 1.2  | 1.1 | 2.5 | 1.3 | 1.4 | 1.4 | 1.9 | 1.1  |
| 203022_at   | RNASEH2A  | ribonuclease H2, large subunit                                                                                             | 0.000196999 | -0.3 | -0.2 | -0.3 | 0.1  | -0.3 | 0.1  | 0.5  | 0.7  | 0.5  | 0.6  | 1.3  | 1.0  | 1.0 | 1.3 | 0.9  | 1.8  | 1.4 | 0.7  | 1.1 | 1.5 | 1.5 | 1.6 | 0.9 | 2.1 | 1.2  |
| 212639_x_at | K-ALPHA-1 | NA                                                                                                                         | 0.001793747 | -1.0 | 0.3  | -0.9 | 0.7  | 1.5  | -0.5 | 1.0  | 0.8  | 0.4  | 0.8  | 1.0  | 1.2  | 1.1 | 1.1 | 0.1  | 1.3  | 1.5 | 1.5  | 1.2 | 1.9 | 1.4 | 1.6 | 1.1 | 1.8 | 1.2  |
| 208977_x_at | TUBB2     | NA                                                                                                                         | 0.000694921 | -0.7 | -0.5 | -1.1 | 0.0  | 0.3  | -1.1 | 1.0  | 0.6  | 0.4  | 0.8  | 1.0  | 1.5  | 1.2 | 1.1 | -0.3 | 1.5  | 2.2 | 0.8  | 0.9 | 1.9 | 1.6 | 1.7 | 0.8 | 2.1 | 1.2  |
| 203211_s_at | MTMR2     | myotubularin related protein 2                                                                                             | 0.005471748 | -0.1 | 0.2  | 0.6  | 0.6  | 0.4  | 0.3  | 0.6  | 1.0  | -0.1 | 0.3  | 1.4  | 1.3  | 1.1 | 2.2 | 1.8  | 1.6  | 0.8 | 0.0  | 0.8 | 1.8 | 1.9 | 1.6 | 0.5 | 1.7 | 0.9  |
| 211058_x_at | K-ALPHA-1 | NA                                                                                                                         | 0.001698604 | -1.2 | 0.8  | -0.2 | 0.5  | 0.9  | -0.4 | 1.1  | 0.8  | 0.3  | 0.6  | 1.0  | 1.4  | 1.2 | 1.1 | 0.2  | 1.4  | 1.4 | 1.4  | 1.1 | 1.7 | 1.4 | 1.5 | 1.4 | 1.7 | 1.2  |
| 202647_s_at | NRAS      | neuroblastoma RAS viral (v-ras) oncogene homolog                                                                           | 0.002633075 | 0.0  | 0.3  | -0.6 | 0.8  | 0.1  | -1.0 | 0.8  | 0.4  | 0.5  | 0.8  | 0.5  | 1.4  | 0.7 | 0.6 | 1.4  | 1.2  | 1.8 | 1.6  | 0.9 | 2.8 | 1.4 | 1.1 | 1.1 | 1.3 | 0.8  |
| 211747_s_at | LSM5      | LSM5 homolog, U6 small nuclear RNA associated (S. cerevisiae)                                                              | 0.004239581 | -0.2 | 0.3  | -0.5 | 0.3  | 1.2  | -0.6 | -0.2 | 0.7  | 0.5  | 0.5  | 0.9  | 0.4  | 0.5 | 1.0 | 3.5  | 1.4  | 1.7 | 0.1  | 0.8 | 2.6 | 1.3 | 0.9 | 0.9 | 1.2 | 0.7  |
| 211713_x_at | KIAA0101  | KIAA0101                                                                                                                   | 0.007908176 | -0.9 | 0.2  | 1.4  | 0.2  | -0.4 | 0.2  | 0.7  | 1.3  | 0.8  | 0.1  | 1.6  | 2.3  | 1.7 | 1.5 | 1.9  | 1.2  | 1.2 | 0.5  | 0.8 | 2.5 | 2.0 | 1.2 | 0.6 | 1.9 | -0.3 |
| 206110_at   | HIST1H3H  | histone 1, H3h                                                                                                             | 0.008566668 | -0.3 | 0.3  | 0.1  | 0.4  | -0.2 | -0.3 | -0.9 | -0.5 | -0.9 | -0.5 | 1.7  | 1.4  | 1.4 | 1.2 | 1.7  | -1.4 | 1.3 | 2.6  | 1.9 | 2.9 | 0.0 | 0.8 | 0.4 | 1.9 | 1.9  |
| 204173_at   | MLC1SA    | NA                                                                                                                         | 0.003765738 | -0.2 | -0.2 | -0.2 | 1.0  | 0.2  | -0.1 | 0.2  | 0.8  | 1.1  | 1.1  | 1.2  | 1.7  | 1.2 | 1.6 | 0.5  | 2.0  | 1.6 | 0.6  | 1.0 | 1.9 | 1.5 | 1.4 | 1.2 | 1.4 | 0.7  |
| 227545_at   | BARD1     | BRCA1 associated RING domain 1                                                                                             | 0.00317397  | 0.3  | -0.2 | 0.1  | -0.3 | 1.2  | 0.6  | 0.5  | 1.2  | 0.4  | 0.6  | 1.8  | 1.5  | 0.5 | 0.8 | 1.3  | 1.5  | 1.0 | 0.9  | 1.2 | 1.9 | 1.5 | 2.4 | 0.7 | 1.6 | 1.1  |
| 209715_at   | CBX5      | chromobox homolog 5 (HP1 alpha homolog, Drosophila)                                                                        | 0.000939527 | -0.5 | 0.3  | -0.5 | -0.2 | 0.3  | -0.3 | 0.4  | 0.5  | 0.3  | 0.3  | 1.5  | 1.0  | 1.3 | 1.9 | 0.7  | 1.8  | 1.7 | 0.0  | 1.2 | 1.9 | 1.3 | 1.0 | 0.5 | 1.4 | 1.8  |
| 213726_x_at | TUBB2     | NA                                                                                                                         | 0.001268362 | -0.8 | 0.4  | -1.1 | 0.0  | 0.1  | -0.9 | 0.4  | 0.7  | 0.2  | 0.6  | 1.1  | 1.4  | 1.1 | 0.9 | -0.4 | 1.5  | 2.0 | 0.7  | 1.0 | 1.7 | 1.6 | 1.8 | 1.0 | 2.2 | 1.3  |
| 218392_x_at | SFXN1     | sideroflexin 1                                                                                                             | 0.003073746 | 0.8  | -0.3 | 0.3  | 0.2  | 0.4  | 0.1  | -0.1 | 0.8  | 0.0  | 0.0  | 1.4  | 1.5  | 0.9 | 1.8 | 1.1  | 2.0  | 1.6 | -0.1 | 1.4 | 1.3 | 1.2 | 1.4 | 1.0 | 1.6 | 1.2  |
| 208795_s_at | MCM7      | MCM7 minichromosome maintenance deficient 7 (S. cerevisiae)                                                                | 0.002740675 | 0.0  | 0.5  | -0.4 | 0.2  | 0.2  | 0.3  | 0.5  | 1.0  | 0.4  | 0.4  | 1.6  | 1.3  | 1.1 | 2.0 | 0.5  | 2.0  | 1.3 | 0.5  | 0.8 | 1.6 | 1.5 | 1.5 | 0.9 | 1.6 | 1.1  |
| 244519_at   | ASXL1     | additional sex combs like 1 (Drosophila)                                                                                   | 0.000766415 | 0.9  | -0.4 | 0.0  | 0.0  | 0.9  | -0.4 | -0.3 | 0.6  | 0.3  | 0.1  | 1.0  | 1.4  | 0.9 | 1.8 | 0.3  | 1.4  | 1.5 | 0.5  | 0.6 | 2.3 | 1.4 | 1.0 | 1.4 | 1.8 | 1.5  |
| 228955_at   | NA        | NA                                                                                                                         | 0.001978564 | 0.3  | 0.8  | 0.2  | 0.2  | 0.1  | 0.5  | 0.0  | 0.7  | 0.5  | 0.2  | 1.4  | 0.8  | 1.0 | 1.2 | 1.8  | 1.5  | 1.6 | 0.4  | 1.0 | 1.9 | 1.1 | 1.4 | 0.4 | 1.4 | 1.7  |
| 204835_at   | POLA      | polymerase (DNA directed), alpha                                                                                           | 0.002061147 | -0.3 | -0.3 | -0.5 | 0.3  | 0.2  | 0.2  | 0.3  | 1.1  | 0.3  | 0.5  | 1.2  | 1.9  | 0.9 | 1.9 | 1.3  | 1.6  | 1.6 | 0.3  | 0.5 | 2.1 | 1.4 | 1.8 | 1.0 | 1.3 | 0.9  |
| 213984_at   | SCC-112   | NA                                                                                                                         | 0.004094219 | 0.4  | 0.0  | 0.3  | 0.6  | 0.2  | -0.4 | -0.1 | 0.3  | 1.0  | 0.6  | 0.3  | 1.1  | 1.0 | 1.7 | 1.3  | 1.9  | 1.3 | 0.6  | 1.0 | 1.8 | 1.6 | 1.3 | 0.5 | 1.5 | 0.7  |
| 201555_at   | MCM3      | MCM3 minichromosome maintenance deficient 3 (S. cerevisiae)                                                                | 0.002167649 | -0.1 | 0.2  | -0.4 | 0.1  | 0.6  | 0.2  | 0.2  | 1.1  | 0.0  | 0.3  | 1.5  | 1.2  | 1.0 | 2.0 | 0.0  | 1.9  | 1.5 | 0.4  | 0.8 | 1.9 | 1.5 | 1.6 | 0.7 | 1.7 | 1.3  |
| 203716_s_at | DPP4      | dipeptidylpeptidase 4 (CD26, adenosine deaminase complexing protein 2)                                                     | 0.007863659 | 0.5  | 0.2  | -0.6 | 0.1  | -0.5 | 0.5  | 0.2  | 1.0  | 0.4  | 0.1  | 1.2  | -0.3 | 0.5 | 2.7 | 0.8  | 1.6  | 0.7 | 0.1  | 1.4 | 1.9 | 1.4 | 0.9 | 0.8 | 2.4 | 1.0  |
| 202269_x_at | GBP1      | guanylate binding protein 1, interferon-inducible, 67kDa                                                                   | 0.007583677 | -0.6 | -0.3 | -1.6 | 0.3  | 1.8  | 0.8  | 1.2  | 0.8  | 0.4  | 0.1  | 1.4  | 2.6  | 1.1 | 1.4 | 0.7  | 1.4  | 1.3 | 1.7  | 1.6 | 0.6 | 2.3 | 1.6 | 0.8 | 0.2 | 1.6  |
| 227211_at   | PHF19     | PHD finger protein 19                                                                                                      | 0.001631715 | 0.5  | -0.3 | -0.3 | 0.3  | 0.0  | -0.6 | 0.5  | 0.8  | 0.6  | 0.5  | 1.2  | 1.6  | 0.9 | 1.3 | 0.5  | 1.5  | 1.7 | 1.1  | 0.7 | 2.0 | 1.4 | 1.5 | 1.2 | 1.8 | 0.8  |
| 204186_s_at | PPID      | peptidylprolyl isomerase D (cyclophilin D)                                                                                 | 0.001232219 | -0.6 | 0.2  | -0.1 | 0.4  | 0.7  | -0.3 | 0.0  | 0.7  | -0.1 | 0.3  | 0.7  | 0.8  | 0.4 | 0.9 | 2.5  | 1.6  | 1.4 | 0.2  | 0.9 | 1.9 | 1.2 | 1.5 | 1.1 | 1.7 | 1.1  |
| 225765_at   | TNPO1     | transportin 1                                                                                                              | 0.001238231 | 0.5  | -0.4 | 0.0  | 0.1  | 0.0  | -0.1 | 0.3  | 0.7  | 0.0  | 0.1  | 1.1  | 1.2  | 0.7 | 1.5 | 1.7  | 1.4  | 1.3 | 0.0  | 1.0 | 2.0 | 1.4 | 1.3 | 1.0 | 1.8 | 1.2  |
| 227291_s_at | BOLA3     | bolA-like 3 (E. coli)                                                                                                      | 0.005228626 | -0.8 | 0.3  | -1.3 | 0.2  | 0.5  | 0.5  | -0.1 | 0.9  | 0.4  | 0.1  | 1.5  | 0.8  | 0.9 | 1.9 | 1.1  | 2.3  | 1.0 | -0.2 | 0.9 | 1.7 | 1.8 | 1.4 | 0.8 | 1.6 | 1.1  |
| 205053_at   | PRIM1     | primase, polypeptide 1, 49kDa                                                                                              | 0.008376158 | 0.2  | 0.3  | -1.0 | 0.3  | 0.8  | 0.7  | 0.0  | 1.2  | 0.3  | 0.1  | 1.8  | 1.4  | 0.6 | 1.9 | 1.4  | 1.8  | 1.2 | 0.4  | 0.9 | 1.8 | 1.5 | 1.0 | 0.9 | 1.5 | 1.3  |
| 201490_s_at | PPIF      | peptidylprolyl isomerase F (cyclophilin F)                                                                                 | 0.006652014 | 1.3  | -0.5 | 0.1  | 0.3  | -0.4 | 0.1  | 0.2  | -0.7 | 0.1  | 0.4  | -0.2 | 1.2  | 0.4 | 0.7 | 0.0  | 1.4  | 1.9 | 1.7  | 0.7 | 2.0 | 1.8 | 1.4 | 1.0 | 2.4 | 0.7  |
| 221520_s_at | CDCA8     | cell division cycle associated 8                                                                                           | 0.002395175 | 0.2  | -0.2 | 0.4  | -0.1 | -0.1 | 0.2  | 0.8  | 0.6  | 0.4  | 0.2  | 1.1  | 1.7  | 0.9 | 1.4 | 1.0  | 2.0  | 1.2 | 0.3  | 1.1 | 1.2 | 1.2 | 1.4 | 0.9 | 2.6 | 0.9  |
| 211750_x_at | TUBA6     | NA                                                                                                                         | 0.001868341 | -1.2 | -0.1 | -0.7 | 0.6  | 0.4  | -0.1 | 1.1  | 0.7  | 0.3  | 0.8  | 1.0  | 1.2  | 0.9 | 1.0 | -0.1 | 1.4  | 1.5 | 1.4  | 1.2 | 1.8 | 1.4 | 1.5 | 1.2 | 1.8 | 1.1  |
| 202483_s_at | RANBP1    | RAN binding protein 1                                                                                                      | 0.005854666 | -0.1 | -0.6 | -1.4 | 0.4  | 1.4  | 0.0  | 0.4  | 0.5  | 0.2  | 0.4  | 1.3  | 0.8  | 0.8 | 1.7 | 0.5  | 1.8  | 1.7 | 0.7  | 0.9 | 1.9 | 1.5 | 1.2 | 0.9 | 1.5 | 1.0  |
| 212378_at   | GART      | phosphoribosylglycinamide formyltransferase, phosphoribosylglycinamide synthetase, phosphoribosylaminoimidazole synthetase | 0.006444    |      |      |      |      |      |      |      |      |      |      |      |      |     |     |      |      |     |      |     |     |     |     |     |     |      |

|              |             |                                                                                                                                        |             |      |      |      |      |      |      |      |      |      |      |      |      |     |      |      |      |     |      |     |     |     |     |     |     |     |
|--------------|-------------|----------------------------------------------------------------------------------------------------------------------------------------|-------------|------|------|------|------|------|------|------|------|------|------|------|------|-----|------|------|------|-----|------|-----|-----|-----|-----|-----|-----|-----|
| 202533_s_at  | DHFR        | dihydrofolate reductase                                                                                                                | 0.005636185 | -0.1 | -0.3 | -0.2 | 0.8  | 0.2  | 0.1  | 0.5  | 0.4  | 0.5  | 0.3  | 1.8  | 1.5  | 0.7 | 1.4  | 0.5  | 2.2  | 1.3 | 0.3  | 0.9 | 1.7 | 0.9 | 1.5 | 0.7 | 2.6 | 1.1 |
| 209853_s_at  | PSME3       | proteasome (prosome, macropain) activator subunit 3 (PA28 gamma; Ki)                                                                   | 0.005555842 | -0.5 | 0.5  | -0.5 | 0.1  | -0.3 | 0.5  | 0.8  | 0.3  | 0.2  | 0.6  | 0.8  | 1.6  | 1.0 | 1.0  | -0.1 | 1.7  | 1.4 | 1.2  | 0.6 | 1.7 | 1.1 | 1.6 | 1.4 | 2.1 | 1.2 |
| 209251_x_at  | TUBA6       | NA                                                                                                                                     | 0.000702205 | -1.4 | 0.1  | -0.6 | 0.5  | 1.2  | -0.4 | 1.2  | 0.6  | 0.2  | 0.7  | 1.0  | 1.2  | 1.0 | 1.0  | 0.0  | 1.3  | 1.4 | 1.4  | 1.2 | 1.6 | 1.4 | 1.4 | 1.3 | 1.8 | 1.2 |
| 205933_at    | SETBP1      | SET binding protein 1                                                                                                                  | 0.000436685 | 0.6  | -1.0 | -0.1 | -0.2 | 0.1  | -0.2 | 1.4  | 0.5  | 0.4  | 0.6  | 1.1  | 2.1  | 1.8 | 1.6  | 1.1  | 1.2  | 0.9 | 0.5  | 0.5 | 1.1 | 1.3 | 1.5 | 1.1 | 1.7 | 1.5 |
| 212590_at    | RRAS2       | related RAS viral (r-ras) oncogene homolog 2                                                                                           | 0.006112531 | 0.2  | 0.0  | -0.5 | 0.2  | -0.2 | 0.1  | -0.2 | 0.6  | 0.9  | 0.4  | 2.1  | 0.8  | 1.1 | 2.4  | 0.5  | 1.9  | 1.6 | -0.7 | 0.4 | 2.2 | 1.7 | 1.9 | 0.8 | 1.0 | 1.2 |
| 205449_at    | SAC3D1      | SAC3 domain containing 1                                                                                                               | 0.000933105 | -1.0 | -0.2 | -0.3 | 0.4  | 0.0  | 0.1  | 0.6  | 0.6  | 0.1  | 0.3  | 0.8  | 1.0  | 0.9 | 1.1  | 0.1  | 0.8  | 2.2 | 1.6  | 0.9 | 2.5 | 0.9 | 1.3 | 1.1 | 1.6 | 1.0 |
| 1554080_at   | RQCD1       | RCD1 required for cell differentiation1 homolog (S. pombe)                                                                             | 0.002577155 | 0.5  | 0.0  | -0.2 | 0.4  | 0.9  | -0.2 | -0.1 | 0.4  | 0.6  | 0.1  | 1.1  | 0.9  | 0.8 | 1.6  | 1.6  | 1.8  | 1.4 | 0.2  | 0.8 | 1.9 | 1.5 | 1.2 | 0.8 | 1.2 | 1.0 |
| 212810_s_at  | SLC1A4      | solute carrier family 1 (glutamate/neutral amino acid transporter), member 4                                                           | 0.001412824 | -0.2 | -0.4 | 0.0  | 0.4  | 0.3  | 0.4  | 0.8  | 0.7  | 0.0  | 0.5  | 0.8  | 1.3  | 0.9 | 1.3  | 0.0  | 1.7  | 1.7 | 0.9  | 0.9 | 1.3 | 1.5 | 2.2 | 0.8 | 1.8 | 0.8 |
| 225114_at    | AGPS        | alkylglycerone phosphate synthase                                                                                                      | 0.00230326  | 0.7  | -0.2 | -0.4 | 0.7  | 0.2  | 0.1  | -0.2 | 0.0  | 0.4  | 0.4  | 0.3  | 1.2  | 0.7 | 0.2  | 3.4  | 1.0  | 1.7 | 1.3  | 0.7 | 2.9 | 0.6 | 0.8 | 0.9 | 1.0 | 0.8 |
| 221987_s_at  | SRR         | serine racemase                                                                                                                        | 0.003937638 | -0.3 | 1.0  | -0.6 | 0.9  | -0.2 | 0.4  | 0.2  | 0.3  | 0.2  | 0.0  | 1.0  | 1.2  | 0.9 | 0.6  | 0.6  | 1.2  | 1.5 | 0.4  | 0.8 | 1.9 | 1.2 | 1.8 | 1.3 | 2.3 | 1.1 |
| 210046_s_at  | IDH2        | isocitrate dehydrogenase 2 (NADP+), mitochondrial                                                                                      | 0.006990843 | -1.1 | 0.6  | -0.4 | 0.5  | -0.2 | -0.2 | 0.8  | 0.7  | 0.5  | 0.9  | 1.2  | 1.9  | 1.2 | 1.6  | 0.1  | 2.2  | 1.7 | 1.1  | 0.7 | 1.5 | 1.2 | 1.6 | 0.5 | 1.0 | 1.2 |
| 201016_at    | EIF1AX      | eukaryotic translation initiation factor 1A, X-linked                                                                                  | 0.001595638 | -0.2 | -0.2 | -0.4 | 0.4  | 0.1  | -0.5 | -0.1 | 0.3  | 0.0  | 0.2  | 0.5  | 0.5  | 0.6 | 0.7  | 2.9  | 1.6  | 1.4 | 0.6  | 0.8 | 2.5 | 1.1 | 1.0 | 0.9 | 0.9 | 0.5 |
| 216870_x_at  | DLEU2       | deleted in lymphocytic leukemia, 2                                                                                                     | 0.001647263 | -0.3 | 0.5  | 0.0  | 0.7  | -0.4 | -0.1 | 0.4  | 0.6  | 0.5  | 0.6  | 1.0  | 0.7  | 1.3 | 0.9  | 2.9  | 1.6  | 1.2 | 0.6  | 0.5 | 1.6 | 0.4 | 1.3 | 0.7 | 1.4 | 1.2 |
| 222646_s_at  | ERO1L       | ERO1-like (S. cerevisiae)                                                                                                              | 0.000969921 | -0.4 | 0.7  | -1.1 | 0.3  | 0.4  | -0.8 | 0.0  | 0.4  | 0.2  | 0.4  | 0.9  | 1.4  | 0.7 | 0.6  | 2.0  | 1.0  | 1.4 | 1.2  | 0.6 | 2.5 | 1.2 | 0.9 | 1.3 | 1.4 | 0.8 |
| 202154_x_at  | TUBB3       | tubulin, beta 3                                                                                                                        | 0.000865202 | -0.3 | -0.2 | -0.7 | 0.0  | -1.1 | -0.9 | 0.3  | 0.2  | 0.1  | 0.5  | 1.0  | 1.3  | 0.9 | 1.0  | 0.0  | 1.5  | 1.2 | 0.6  | 1.0 | 1.9 | 1.7 | 1.8 | 0.9 | 2.0 | 1.0 |
| 225647_s_at  | CTSC        | cathepsin C                                                                                                                            | 0.001139245 | -1.0 | -0.5 | -0.4 | 0.5  | 0.0  | 0.3  | 0.9  | 0.4  | 0.3  | 0.8  | 0.9  | 0.4  | 1.2 | 0.8  | 0.8  | 1.4  | 1.4 | 1.0  | 0.5 | 2.0 | 1.6 | 1.4 | 0.7 | 1.2 | 1.5 |
| 205733_at    | BLM         | Bloom syndrome                                                                                                                         | 0.006107336 | 0.3  | 0.2  | -0.4 | 0.2  | -0.1 | 1.0  | 0.4  | 0.9  | 0.2  | 0.3  | 0.7  | 1.3  | 0.9 | 1.5  | 1.4  | 1.8  | 0.8 | 0.2  | 0.6 | 1.3 | 1.4 | 1.5 | 1.0 | 2.0 | 1.2 |
| 218069_at    | XTP3TPA     | NA                                                                                                                                     | 0.000481722 | -0.6 | -0.3 | -0.4 | 0.1  | 0.2  | 0.3  | 0.1  | 0.5  | 0.3  | 0.2  | 1.1  | 1.0  | 0.6 | 1.4  | 0.9  | 1.5  | 1.3 | 0.4  | 1.0 | 1.6 | 1.6 | 1.4 | 1.2 | 1.7 | 0.9 |
| 209398_at    | HIST1H1C    | histone 1, H1c                                                                                                                         | 0.003906921 | -0.9 | 0.6  | -0.3 | 0.5  | 0.2  | 0.0  | -0.3 | 0.5  | 0.6  | 0.8  | 1.4  | 1.5  | 0.8 | 1.7  | 0.3  | 2.0  | 2.0 | 0.8  | 0.4 | 1.6 | 1.5 | 1.3 | 0.4 | 0.3 | 2.3 |
| 214437_s_at  | SHMT2       | serine hydroxymethyltransferase 2 (mitochondrial)                                                                                      | 0.00711052  | -0.4 | -0.3 | -1.2 | 0.7  | 1.1  | 0.4  | 0.1  | 0.5  | 0.3  | 0.6  | 0.7  | 0.5  | 0.8 | 0.7  | 0.1  | 1.4  | 1.7 | 1.3  | 1.0 | 2.0 | 0.9 | 1.9 | 0.9 | 1.7 | 1.0 |
| 217294_s_at  | ENO1        | enolase 1, (alpha)                                                                                                                     | 0.001823707 | -1.1 | 0.4  | 0.3  | 0.9  | 0.3  | 0.4  | 0.1  | -0.5 | 0.3  | 0.6  | 0.6  | 0.5  | 0.4 | 0.3  | -0.7 | 2.1  | 2.1 | 1.5  | 1.7 | 1.9 | 1.0 | 1.4 | 1.0 | 1.5 | 1.1 |
| 210691_s_at  | CACYBP      | calyculin binding protein                                                                                                              | 0.005520571 | -0.7 | 0.6  | 0.1  | 0.3  | 0.5  | -0.1 | -0.1 | 0.7  | 0.3  | 0.4  | 0.9  | 1.0  | 0.9 | 1.1  | 1.6  | 1.9  | 1.5 | -0.1 | 0.8 | 2.4 | 1.1 | 1.5 | 0.6 | 1.2 | 0.9 |
| 209849_s_at  | RAD51C      | RAD51 homolog C (S. cerevisiae)                                                                                                        | 0.001636043 | -1.4 | -0.2 | 0.1  | 0.4  | 1.3  | 0.2  | 0.7  | 0.7  | 0.0  | 0.0  | 1.0  | 1.5  | 0.7 | 1.3  | 1.1  | 1.4  | 1.1 | 0.0  | 0.6 | 1.6 | 1.8 | 1.8 | 1.1 | 2.4 | 0.4 |
| 208792_s_at  | CLU         | clusterin (complement lysis inhibitor, SP-40,40, sulfated glycoprotein 2, testosterone-repressed prostate message 2, apolipoprotein J) | 0.009842365 | -0.3 | -0.8 | 0.7  | 0.2  | 0.4  | 0.9  | 0.1  | -0.2 | -0.3 | 0.4  | 1.8  | 1.0  | 1.2 | 0.8  | -0.4 | -2.1 | 1.4 | 3.0  | 2.0 | 2.6 | 0.4 | 1.0 | 1.2 | 2.6 | 1.6 |
| 220239_at    | KLHL7       | kelch-like 7 (Drosophila)                                                                                                              | 0.00093305  | -0.6 | 0.7  | -0.2 | 0.7  | -0.1 | -0.2 | 0.4  | 0.1  | 0.5  | 0.6  | 0.9  | 2.0  | 0.9 | 1.5  | 0.4  | 1.8  | 2.1 | 1.3  | 0.8 | 2.6 | 1.1 | 1.2 | 0.8 | 0.8 | 0.1 |
| 202854_at    | HPRT1       | hypoxanthine phosphoribosyltransferase 1 (Lesch-Nyhan syndrome)                                                                        | 0.006308164 | -1.1 | 0.4  | -1.1 | 0.3  | 0.0  | -0.1 | 0.2  | 0.5  | 0.4  | 0.5  | 0.7  | 1.3  | 1.0 | 1.0  | 1.7  | 1.3  | 1.6 | 1.0  | 0.6 | 2.2 | 1.1 | 1.1 | 0.6 | 1.3 | 0.8 |
| 222011_s_at  | ACAT2       | acetyl-Coenzyme A acetyltransferase 2 (acetoacetyl Coenzyme A thiolase)                                                                | 0.000697794 | -0.1 | 0.5  | 0.3  | 0.6  | 0.0  | -0.7 | -0.1 | 0.4  | 0.3  | 0.5  | 0.7  | 0.9  | 0.8 | 1.5  | 2.4  | 1.0  | 1.3 | 0.6  | 0.5 | 2.5 | 1.0 | 1.1 | 0.5 | 0.9 | 1.2 |
| 227916_x_at  | EXOSC3      | exosome component 3                                                                                                                    | 0.008487963 | -1.5 | 0.8  | -0.4 | 0.5  | 0.0  | -1.0 | 1.3  | 0.3  | -0.1 | 0.0  | 0.8  | 1.3  | 0.8 | 1.2  | 0.4  | 1.5  | 0.8 | 0.8  | 1.1 | 1.3 | 1.1 | 1.8 | 1.5 | 2.2 | 0.8 |
| 219819_s_at  | MRPS28      | mitochondrial ribosomal protein S28                                                                                                    | 0.001794538 | -0.1 | 0.3  | -0.3 | -0.2 | -0.6 | 0.4  | 0.4  | 0.5  | 0.5  | -0.1 | 0.8  | 0.7  | 0.9 | 0.6  | 0.7  | 1.7  | 1.4 | 1.1  | 0.7 | 2.1 | 1.3 | 1.4 | 1.2 | 1.7 | 0.5 |
| 222404_x_at  | HSPC121     | NA                                                                                                                                     | 0.005628209 | -0.1 | -0.7 | -1.1 | 0.0  | 0.5  | 0.3  | 0.8  | 0.5  | 0.3  | -0.2 | 1.4  | 1.1  | 0.7 | 1.3  | 0.4  | 2.1  | 1.4 | 0.0  | 1.2 | 1.7 | 1.8 | 1.4 | 0.6 | 1.7 | 1.0 |
| 201489_at    | PPIF        | peptidylprolyl isomerase F (cyclophilin F)                                                                                             | 0.003593293 | 1.0  | -0.2 | -0.4 | 0.4  | 0.4  | 0.0  | 0.7  | -0.4 | 0.7  | 0.7  | 0.2  | 1.2  | 0.4 | 0.7  | -0.9 | 0.7  | 2.4 | 2.0  | 0.5 | 2.4 | 1.5 | 1.6 | 1.3 | 2.1 | 0.7 |
| 203465_at    | MRPL19      | mitochondrial ribosomal protein L19                                                                                                    | 0.002698054 | -0.1 | -0.1 | -0.4 | 0.2  | -0.4 | -0.2 | 0.6  | 0.4  | 0.2  | 0.4  | 0.7  | 0.9  | 1.0 | 1.2  | 1.8  | 1.6  | 1.4 | 0.6  | 0.8 | 1.6 | 0.9 | 1.0 | 0.8 | 1.6 | 1.1 |
| 201829_at    | NET1        | neuroepithelial cell transforming gene 1                                                                                               | 0.008267211 | 0.9  | 0.9  | 0.0  | 0.2  | -0.3 | -0.2 | 0.0  | 0.9  | -0.1 | 0.1  | 1.2  | 1.0  | 0.6 | 1.0  | 1.0  | 1.3  | 1.7 | 0.6  | 0.2 | 1.9 | 0.7 | 1.6 | 1.5 | 2.0 | 1.1 |
| 224320_s_at  | MCM8        | MCM8 minichromosome maintenance deficient 8 (S. cerevisiae)                                                                            | 0.002101713 | 0.1  | -0.3 | 0.2  | 0.0  | 0.6  | -0.4 | 0.4  | 1.2  | -0.1 | -0.1 | 1.7  | 1.0  | 1.0 | 1.5  | 1.4  | 1.8  | 1.4 | -0.5 | 0.4 | 1.4 | 1.0 | 1.9 | 1.0 | 1.9 | 1.1 |
| 218549_s_at  | FAM82B      | family with sequence similarity 82, member B                                                                                           | 0.004308557 | -0.4 | 0.7  | -0.8 | 0.5  | 1.8  | 1.0  | 0.7  | 0.2  | 0.5  | 0.7  | 0.7  | 1.0  | 0.9 | 0.4  | 2.3  | 1.3  | 1.5 | 1.1  | 0.5 | 2.1 | 1.0 | 1.0 | 1.1 | 1.3 | 0.8 |
| 1555618_s_at | SAE1        | NA                                                                                                                                     | 0.00434193  | -0.6 | 0.7  | 0.3  | 0.3  | 0.1  | 0.8  | 0.4  | 0.1  | 0.3  | 0.6  | 0.6  | 1.3  | 0.3 | 1.9  | 1.7  | 2.0  | 1.5 | 0.8  | 1.3 | 1.7 | 1.1 | 0.6 | 0.6 | 1.4 | 0.4 |
| 208910_s_at  | C1QBP       | complement component 1, q subcomponent binding protein                                                                                 | 0.002808335 | -1.2 | 0.2  | -0.3 | 0.0  | 0.2  | 0.3  | 0.1  | 0.7  | 0.4  | 0.5  | 0.7  | -0.1 | 0.6 | 1.1  | 0.9  | 1.6  | 1.4 | 0.4  | 1.1 | 2.4 | 0.9 | 1.1 | 1.2 | 1.5 | 0.8 |
| 217834_s_at  | SYNCRIP     | synaptotagmin binding, cytoplasmic RNA interacting protein                                                                             | 0.000398543 | -2.7 | -0.5 | -0.3 | 0.4  | -0.2 | -0.9 | 0.6  | 0.2  | 0.1  | 0.0  | 0.5  | 1.4  | 0.6 | 0.6  | 1.6  | 0.9  | 1.7 | 0.9  | 0.8 | 2.2 | 0.9 | 1.3 | 1.3 | 1.8 | 0.5 |
| 209231_s_at  | DCTN5       | dynalectin 5 (p25)                                                                                                                     | 0.002342813 | 0.6  | -0.7 | -0.3 | 0.4  | -0.4 | -0.1 | 0.7  | 0.7  | 0.1  | 0.3  | 0.8  | 1.2  | 1.0 | 1.0  | 0.2  | 2.1  | 0.6 | 0.6  | 1.3 | 1.0 | 1.5 | 1.1 | 1.2 | 2.4 | 1.2 |
| 201614_s_at  | RUVBL1      | RuvB-like 1 (E. coli)                                                                                                                  | 0.002999358 | -1.0 | -0.4 | -0.4 | 0.5  | -1.0 | 0.3  | 0.2  | 0.8  | 0.4  | 0.5  | 1.6  | 0.7  | 1.0 | 2.0  | 1.3  | 1.9  | 1.1 | 0.1  | 0.9 | 2.0 | 1.2 | 1.1 | 0.3 | 1.4 | 0.7 |
| 222962_s_at  | MCM10       | MCM10 minichromosome maintenance deficient 10 (S. cerevisiae)                                                                          | 0.00704105  | -0.2 | -0.3 | 0.1  | 0.1  | 0.5  | 0.3  | 0.5  | 0.8  | 0.5  | 0.2  | 1.6  | 1.1  | 0.9 | 1.5  | 1.1  | 2.0  | 0.8 | 0.1  | 0.5 | 1.2 | 0.8 | 1.8 | 0.7 | 2.7 | 0.7 |
| 202760_s_at  | PALM2-AKAP2 | NA                                                                                                                                     | 0.003909305 | 0.5  | 0.3  | 0.1  | 0.4  | -0.1 | -0.1 | 0.7  | 1.3  | -0.2 | 1.4  | 1.5  | 1.9  | 1.5 | 1.6  | -0.4 | 1.5  | 1.3 | 0.5  | 0.6 | 0.9 | 1.5 | 2.7 | 0.0 | 1.4 | 2.0 |
| 223515_s_at  | COQ3        | coenzyme Q3 homolog, methyltransferase (yeast)                                                                                         | 0.005326161 | -0.1 | -0.1 | -0.5 | 0.2  | 0.1  | -0.4 | 0.4  | 0.9  | 0.2  | 0.2  | 1.4  | 0.7  | 0.7 | 1.8  | 1.6  | 2.0  | 0.8 | -0.2 | 1.0 | 1.5 | 1.3 | 1.2 | 0.5 | 1.7 | 1.1 |
| 226118_at    | ADCY3       | adenylate cyclase 3                                                                                                                    | 0.001492116 | 0.3  | -0.1 | -0.2 | -0.2 | 1.2  | 0.3  | 0.9  | 1.0  | 0.2  | 0.4  | 1.3  | 1.2  | 1.4 | 1.5  | 0.8  | 1.6  | 1.6 | 0.3  | 0.9 | 0.9 | 1.2 | 1.8 | 0.3 | 1.5 | 1.1 |
| 204252_at    | CDK2        | cyclin-dependent kinase 2                                                                                                              | 0.002564403 | 0.3  | -0.3 | -0.1 | 0.1  | 0.1  | 0.4  | 0.0  | 0.8  | 0.1  | 0.4  | 1.5  | 1.3  | 0.6 | 1.4  | 0.8  | 1.5  | 1.7 | 0.2  | 1.3 | 1.3 | 1.0 | 0.9 | 1.1 | 2.0 | 1.2 |
| 211767_at    | SLD5        | NA                                                                                                                                     | 0.007971561 | -0.6 | -0.3 | 0.2  | 0.5  | 0.3  | 0.2  | 0.3  | 1.3  | 0.5  | 0.7  | 0.8  | 1.5  | 0.8 | 2.2  | 0.6  | 1.8  | 1.2 | 0.1  | 0.2 | 1.6 | 0.9 | 1.2 | 1.4 | 2.0 | 0.9 |
| 202872_at    | ATP6V1C1    | ATPase, H+ transporting, lysosomal 42kDa, V1 subunit C, isoform 1                                                                      | 3.99879E-05 | -1.0 | -0.2 | 0.3  | 0.2  | 0.1  | 0.0  | 1.3  | -0.5 | 0.1  | 0.6  | -0.1 | 0.8  | 0.5 | -0.4 | 1.7  | 0.9  | 1.2 | 2.2  | 0.8 | 1.6 | 0.9 | 1.1 | 1.6 | 1.7 | 1.0 |
| 203023_at    | HSPC111     | NA                                                                                                                                     | 0.000588742 | -0.3 | -0.5 | -0.3 | 0.2  | -0.5 | 0.6  | 0.3  | 0.3  | 0.4  | 0.4  | 0.9  | -0.2 | 0.7 | 0.9  | 1.0  | 1.6  | 0.7 | 0.3  | 1.4 | 1.6 | 1.0 | 1.1 | 1.0 | 2.2 | 1.3 |
| 34764_at     |             |                                                                                                                                        |             |      |      |      |      |      |      |      |      |      |      |      |      |     |      |      |      |     |      |     |     |     |     |     |     |     |

|              |             |                                                                                        |             |      |      |      |      |      |      |      |      |      |      |      |     |     |      |      |      |      |      |     |     |     |     |      |      |     |
|--------------|-------------|----------------------------------------------------------------------------------------|-------------|------|------|------|------|------|------|------|------|------|------|------|-----|-----|------|------|------|------|------|-----|-----|-----|-----|------|------|-----|
| 222209_s_at  | FLJ22104    | NA                                                                                     | 0.006654147 | 1.1  | 0.8  | -0.7 | -0.1 | -0.2 | -0.9 | 0.2  | 0.8  | 0.3  | 0.4  | 1.4  | 0.6 | 0.8 | 1.4  | 2.5  | 1.4  | 0.8  | 0.6  | 0.9 | 1.8 | 1.1 | 1.2 | 0.4  | 1.1  | 0.8 |
| 219785_s_at  | FBXO31      | F-box protein 31                                                                       | 0.002443336 | -0.2 | -0.6 | 0.4  | 0.7  | 0.4  | 0.1  | 0.1  | 0.7  | 0.2  | 0.7  | 1.0  | 1.0 | 0.7 | 1.4  | 1.2  | 1.6  | 0.6  | 0.2  | 0.6 | 1.5 | 1.2 | 2.1 | 1.3  | 1.6  | 0.7 |
| 217919_s_at  | MRPL42      | mitochondrial ribosomal protein L42                                                    | 0.000341417 | -0.8 | -0.4 | -0.3 | 0.0  | -0.5 | -0.4 | 1.0  | 0.8  | 0.3  | 0.4  | 0.8  | 0.6 | 0.8 | 0.8  | 0.6  | 1.8  | 1.2  | 1.1  | 1.1 | 1.5 | 1.4 | 1.4 | 0.8  | 1.6  | 0.7 |
| 212330_at    | TFDP1       | transcription factor Dp-1                                                              | 0.000867781 | -1.7 | -1.0 | 0.4  | 0.8  | -0.4 | 0.1  | 0.4  | 0.9  | 0.5  | 0.5  | 1.0  | 1.9 | 0.8 | 1.5  | 1.1  | 1.4  | 1.6  | 1.1  | 0.7 | 1.9 | 0.8 | 1.1 | 0.9  | 1.3  | 0.5 |
| 226686_at    | LOC493856   | NA                                                                                     | 0.000170816 | -0.3 | -0.7 | 0.2  | 0.2  | -0.5 | 0.3  | 0.3  | 0.1  | 0.0  | 0.4  | 0.6  | 1.4 | 0.7 | 0.8  | 2.1  | 1.4  | 1.5  | 0.8  | 0.8 | 1.4 | 1.2 | 1.0 | 1.1  | 1.2  | 0.6 |
| 222701_s_at  | CHCHD7      | coiled-coil-helix-coiled-coil-helix domain containing 7                                | 0.008484873 | 0.0  | 1.0  | -1.0 | 0.2  | -0.4 | 0.5  | 0.4  | 0.4  | 0.3  | 0.5  | 0.7  | 1.2 | 1.1 | 0.7  | 0.4  | 1.2  | 0.9  | 1.1  | 1.1 | 2.0 | 1.2 | 1.2 | 1.0  | 1.6  | 1.1 |
| 201060_x_at  | STOM        | stomatin                                                                               | 0.007787746 | -0.1 | 0.6  | -1.0 | 0.1  | 2.5  | 0.3  | 1.0  | 0.6  | 0.1  | -0.1 | 1.2  | 2.0 | 1.1 | 1.2  | 2.0  | 1.1  | 1.3  | 0.1  | 0.8 | 1.0 | 1.4 | 1.4 | 0.9  | 1.3  | 1.2 |
| 201764_at    | MGC5576     | NA                                                                                     | 0.003179941 | -0.3 | 0.2  | -0.3 | 0.3  | 0.2  | 0.4  | 0.0  | 0.9  | 0.3  | 0.1  | 1.8  | 1.3 | 0.5 | 2.1  | 0.6  | 2.0  | 1.1  | 0.2  | 0.6 | 1.4 | 1.4 | 1.4 | 0.8  | 1.8  | 0.6 |
| 212568_s_at  | DLAT        | dihydropyrimidine S-acetyltransferase (E2 component of pyruvate dehydrogenase complex) | 0.006073581 | 0.2  | -0.1 | -0.3 | 0.5  | 0.0  | 0.1  | 0.5  | 1.0  | 0.3  | 0.1  | 1.0  | 1.6 | 0.6 | 0.8  | 2.6  | 1.4  | 1.1  | 0.7  | 0.8 | 1.4 | 0.7 | 1.0 | 1.2  | 1.6  | 0.6 |
| 218982_s_at  | MRPS17      | mitochondrial ribosomal protein S17                                                    | 0.003343766 | 0.1  | -0.9 | -0.1 | 0.4  | -0.3 | 0.9  | 0.7  | 0.5  | 0.3  | 0.1  | 0.9  | 1.4 | 0.8 | 1.3  | 0.4  | 1.3  | 1.3  | 0.5  | 0.9 | 1.9 | 1.5 | 1.4 | 1.0  | 1.9  | 0.6 |
| 212811_x_at  | SLC1A4      | solute carrier family 1 (glutamate/neutral amino acid transporter), member 4           | 0.005603682 | -0.5 | 0.2  | 0.4  | 0.7  | 0.6  | 0.6  | 0.1  | 0.6  | 0.1  | 0.6  | 0.8  | 1.7 | 1.0 | 0.8  | 0.1  | 1.9  | 1.4  | 0.7  | 0.8 | 1.3 | 1.3 | 1.4 | 1.3  | 1.9  | 0.6 |
| 203564_at    | FANCG       | Fanconi anemia, complementation group G                                                | 0.00681653  | 0.7  | 0.3  | 0.1  | 0.0  | 1.4  | 0.4  | 0.2  | 1.4  | 0.4  | 0.0  | 1.5  | 1.5 | 1.1 | 1.7  | 1.0  | 1.6  | 1.2  | 0.2  | 0.4 | 1.2 | 1.3 | 1.5 | 0.6  | 1.3  | 1.3 |
| 220094_s_at  | C6orf79     | chromosome 6 open reading frame 79                                                     | 0.003218959 | -0.6 | 0.1  | 0.1  | 0.3  | 0.4  | 0.2  | 0.1  | 0.8  | 0.1  | 0.6  | 1.2  | 1.4 | 1.2 | 1.2  | 0.0  | 0.9  | 1.7  | 0.8  | 0.9 | 2.4 | 0.9 | 1.2 | 0.9  | 1.3  | 1.0 |
| 205687_at    | UBPH        | NA                                                                                     | 0.001820533 | -0.3 | 0.3  | 0.3  | 0.2  | 0.1  | 0.5  | 0.2  | 0.2  | -0.1 | 0.3  | 0.5  | 0.9 | 0.8 | 0.8  | 0.7  | 1.4  | 0.6  | 0.2  | 0.8 | 1.7 | 1.2 | 1.9 | 1.0  | 2.2  | 1.1 |
| 213320_at    | HRMT1L3     | HMT1 hnRNP methyltransferase-like 3 (S. cerevisiae)                                    | 0.007856649 | 0.9  | 0.6  | -0.7 | 0.3  | 0.7  | 0.1  | 0.0  | 0.4  | 0.4  | -0.1 | 0.5  | 0.9 | 0.6 | 0.8  | 2.3  | 1.2  | 1.3  | 0.4  | 0.9 | 2.3 | 1.3 | 0.7 | 0.8  | 1.2  | 0.6 |
| 212533_at    | WEE1        | WEE1 homolog (S. pombe)                                                                | 0.00081113  | -0.1 | 0.1  | -0.4 | 0.0  | 0.7  | 0.7  | 0.3  | 1.0  | 0.0  | 0.0  | 1.7  | 2.1 | 1.3 | 1.5  | 2.5  | 1.4  | 0.6  | 0.1  | 0.4 | 0.8 | 1.2 | 2.0 | 0.3  | 1.0  | 1.2 |
| 1557910_at   | HSPCB       | heat shock 90kDa protein 1, beta                                                       | 0.005139608 | -0.6 | 0.0  | -1.5 | 0.1  | 0.2  | 0.2  | 0.4  | 0.6  | 0.5  | 0.2  | 0.4  | 1.4 | 0.7 | 1.0  | 0.4  | 1.3  | 1.5  | 0.1  | 1.5 | 1.8 | 1.2 | 1.4 | 0.6  | 1.5  | 1.3 |
| 210448_s_at  | P2RX5       | purinergic receptor P2X, ligand-gated ion channel, 5                                   | 0.005875197 | -0.2 | 0.8  | 0.0  | 0.3  | 1.4  | 1.0  | -0.1 | 1.1  | 0.9  | 0.5  | 1.6  | 0.1 | 0.9 | 1.2  | 0.2  | -0.4 | 0.8  | 1.5  | 1.4 | 1.5 | 1.8 | 1.6 | 0.8  | 1.1  | 2.0 |
| 202270_at    | GBP1        | guanylate binding protein 1, interferon-inducible, 67kDa                               | 0.00050976  | -1.1 | 0.2  | 0.1  | 0.3  | 2.2  | 1.1  | 0.9  | 0.4  | -0.1 | 0.0  | 1.0  | 2.0 | 0.7 | 1.0  | 3.1  | 0.7  | 1.2  | 1.7  | 0.9 | 0.2 | 1.9 | 1.3 | 0.6  | -0.1 | 1.0 |
| 206991_s_at  | CCR5        | chemokine (C-C motif) receptor 5                                                       | 0.00176931  | -0.2 | -0.7 | -0.2 | -0.2 | 0.9  | 0.9  | 1.4  | 1.1  | -0.1 | -0.3 | 1.2  | 1.1 | 1.6 | 2.4  | 1.5  | 1.6  | -0.1 | 0.1  | 0.9 | 0.5 | 1.5 | 1.1 | 0.1  | 1.8  | 1.2 |
| 209080_x_at  | TXNL2       | thioredoxin-like 2                                                                     | 0.001141766 | -0.4 | 0.1  | -0.1 | 0.2  | 0.0  | -0.4 | 0.8  | 0.3  | 0.4  | 0.3  | 0.8  | 0.7 | 0.8 | 0.8  | 0.9  | 1.6  | 1.4  | 0.8  | 0.9 | 2.0 | 1.0 | 1.0 | 0.7  | 1.2  | 1.1 |
| 202068_s_at  | LDLR        | low density lipoprotein receptor (familial hypercholesterolemia)                       | 0.002006672 | 0.3  | -0.6 | -1.2 | 0.5  | 1.3  | 0.6  | 0.7  | -0.4 | 0.3  | -0.3 | -0.3 | 1.9 | 0.7 | 1.2  | 0.3  | 0.4  | 1.7  | 1.4  | 0.4 | 1.2 | 1.9 | 1.2 | 1.2  | 1.3  | 1.3 |
| 202759_s_at  | PALM2-AKAP2 | NA                                                                                     | 0.004919508 | -0.9 | 0.2  | -0.4 | 0.6  | -0.8 | -0.1 | 0.3  | 0.8  | 0.3  | 1.4  | 1.5  | 1.7 | 1.3 | 1.7  | 1.0  | 1.7  | 1.1  | 0.1  | 1.0 | 0.4 | 1.4 | 1.7 | 0.1  | 1.1  | 1.6 |
| 204128_s_at  | RFC3        | replication factor C (activator 1) 3, 38kDa                                            | 0.009283647 | 0.3  | 0.1  | -0.2 | 0.3  | 0.0  | 0.1  | 0.0  | 0.8  | 0.5  | 0.8  | 0.7  | 1.3 | 0.4 | 0.8  | 0.8  | 2.3  | 1.1  | 0.5  | 1.3 | 0.7 | 0.9 | 1.4 | 0.8  | 2.5  | 0.7 |
| 205345_at    | BARD1       | BRCA1 associated RING domain 1                                                         | 0.006453447 | 0.2  | 0.6  | 0.5  | -0.2 | 2.1  | 0.2  | 0.8  | 1.1  | 0.2  | 0.3  | 1.4  | 0.6 | 0.8 | 1.2  | -0.4 | 1.7  | 1.2  | 0.8  | 0.8 | 1.9 | 1.4 | 1.5 | 0.6  | 1.4  | 1.3 |
| 239002_at    | ASPM        | asp (abnormal spindle)-like, microcephaly associated (Drosophila)                      | 0.002933488 | -0.5 | -0.4 | 0.1  | 0.6  | -0.4 | -0.5 | 0.8  | 1.1  | 0.5  | 0.5  | 0.8  | 1.2 | 0.9 | 1.0  | 0.5  | 1.7  | 1.2  | 0.3  | 0.3 | 1.1 | 1.0 | 2.0 | 1.0  | 2.4  | 0.8 |
| 231769_at    | FBXO6       | F-box protein 6                                                                        | 0.000935744 | -0.1 | -1.5 | -0.1 | 0.6  | 0.9  | 0.7  | 0.9  | -0.1 | 0.0  | 0.4  | 0.4  | 1.3 | 0.7 | 0.4  | 0.7  | 1.1  | 1.5  | 1.6  | 0.8 | 1.2 | 1.4 | 1.4 | 1.0  | 0.6  | 1.6 |
| 228931_at    | COQ4        | coenzyme Q4 homolog (yeast)                                                            | 0.001599183 | -0.7 | 0.1  | 0.0  | 0.0  | -0.9 | 0.3  | 0.0  | 0.9  | 0.5  | 0.2  | 1.1  | 0.9 | 0.7 | 1.5  | 0.9  | 1.7  | 1.0  | 0.5  | 0.8 | 1.2 | 0.9 | 1.4 | 0.9  | 1.9  | 0.7 |
| 212038_s_at  | VDAC1       | voltage-dependent anion channel 1                                                      | 0.003617036 | -0.8 | -0.2 | -1.1 | 0.5  | 0.5  | -0.5 | 0.3  | 0.2  | 0.4  | 0.5  | 0.4  | 0.5 | 0.7 | 0.7  | 1.5  | 1.1  | 1.5  | 0.8  | 0.8 | 2.1 | 1.0 | 1.2 | 0.7  | 1.4  | 0.7 |
| 209218_at    | SQLE        | squalene epoxidase                                                                     | 0.001620482 | -0.6 | 0.4  | -0.1 | 0.4  | 0.1  | 0.1  | 0.6  | 0.1  | 0.2  | 0.1  | 0.4  | 1.9 | 0.9 | 0.8  | 0.9  | 0.3  | 0.0  | 1.3  | 0.4 | 1.4 | 1.3 | 2.0 | 0.9  | 1.8  | 2.1 |
| 200039_s_at  | PSMB2       | proteasome (prosome, macropain) subunit, beta type, 2                                  | 0.008088016 | -1.4 | -0.5 | -1.7 | 0.3  | 0.8  | 0.0  | 0.6  | 0.3  | 0.5  | 0.5  | 0.8  | 0.6 | 0.7 | 1.0  | 0.2  | 1.6  | 1.6  | 0.9  | 0.5 | 1.9 | 1.4 | 1.2 | 0.8  | 1.5  | 0.8 |
| 202085_at    | TJP2        | tight junction protein 2 (zona occludens 2)                                            | 0.00164002  | -0.8 | -1.9 | -0.6 | 0.8  | 0.3  | -2.0 | 1.4  | -0.6 | -0.7 | 0.7  | 0.0  | 2.4 | 1.3 | -1.0 | 0.5  | -0.5 | 2.8  | 2.9  | 0.2 | 2.3 | 0.5 | 1.3 | 1.4  | 1.7  | 0.9 |
| 216705_s_at  | ADA         | adenosine deaminase                                                                    | 0.004458413 | -0.2 | 0.4  | -0.8 | 0.5  | 0.9  | 0.2  | 0.7  | 0.9  | 0.4  | 0.5  | 1.5  | 1.1 | 1.1 | 2.1  | 0.0  | 1.6  | 1.3  | 0.5  | 0.9 | 1.1 | 1.9 | 1.5 | -0.5 | 0.8  | 1.9 |
| 215380_s_at  | C7orf24     | chromosome 7 open reading frame 24                                                     | 0.001581867 | -1.6 | -0.9 | -0.8 | 0.2  | 1.3  | 1.5  | 0.2  | 0.6  | 0.3  | 0.5  | 1.0  | 1.1 | 0.8 | 1.1  | 0.7  | 1.5  | 1.6  | 0.5  | 1.0 | 1.9 | 1.0 | 1.3 | 0.9  | 1.4  | 0.4 |
| 1558292_s_at | PIGW        | phosphatidylinositol glycan, class W                                                   | 0.002017947 | -1.3 | 0.5  | -0.2 | 0.4  | -0.2 | -0.3 | -0.1 | 0.4  | 0.5  | 0.1  | 0.9  | 0.8 | 0.7 | 1.3  | 2.5  | 0.9  | 1.1  | -0.3 | 1.0 | 1.3 | 1.1 | 1.1 | 1.1  | 1.2  | 0.9 |
| 209520_s_at  | NCBP1       | nuclear cap binding protein subunit 1, 80kDa                                           | 0.002473953 | 0.0  | -0.2 | 0.1  | 0.5  | -0.3 | -0.2 | 1.2  | 0.1  | 0.1  | 0.3  | 0.8  | 1.0 | 0.8 | 0.8  | 0.4  | 1.4  | 1.0  | 0.7  | 0.9 | 1.2 | 1.0 | 1.4 | 0.8  | 2.4  | 1.4 |
| 1556283_s_at | FGFR1OP2    | FGFR1 oncogene partner 2                                                               | 0.003051754 | -0.8 | 0.1  | -0.4 | 1.0  | 0.1  | -1.1 | 0.5  | -0.3 | 0.2  | 1.0  | 0.3  | 1.7 | 0.6 | 0.4  | -0.1 | 1.2  | 1.9  | 2.4  | 0.6 | 2.7 | 0.8 | 1.1 | 0.7  | 1.4  | 0.4 |
| 235256_s_at  | GALM        | galactose mutarotase (aldose 1-epimerase)                                              | 0.001869262 | -0.6 | 0.0  | -0.3 | 0.0  | 0.4  | 0.0  | 0.1  | 1.0  | -0.1 | 0.2  | 1.5  | 0.6 | 0.7 | 2.1  | 1.0  | 2.5  | 1.1  | 0.1  | 0.9 | 1.1 | 0.9 | 1.0 | 0.3  | 1.4  | 0.9 |
| 228286_at    | FLJ40869    | NA                                                                                     | 0.002531505 | 0.4  | 0.0  | -0.5 | 0.3  | 0.4  | -0.4 | 0.4  | 0.7  | 0.1  | 0.3  | 1.0  | 0.6 | 1.2 | 0.6  | 1.8  | 1.5  | 0.9  | 0.5  | 0.4 | 1.4 | 0.6 | 1.3 | 0.6  | 1.8  | 1.4 |
| 209186_at    | ATP2A2      | ATPase, Ca++ transporting, cardiac muscle, slow twitch 2                               | 0.00342191  | -0.1 | 1.2  | -0.1 | 0.3  | 0.7  | -0.2 | 0.9  | 0.0  | 0.6  | 0.2  | 0.5  | 1.4 | 0.5 | 0.6  | 0.9  | 1.1  | 1.4  | 0.7  | 1.1 | 1.8 | 1.5 | 1.3 | 1.0  | 1.4  | 0.6 |
| 212527_at    | D15Wsu75e   | NA                                                                                     | 0.00050975  | -0.2 | 0.9  | -0.5 | 0.0  | -0.1 | -0.1 | 0.2  | 0.2  | 0.2  | 0.5  | 0.5  | 0.8 | 0.6 | 0.6  | 0.9  | 0.8  | 1.0  | 0.9  | 1.3 | 0.9 | 1.4 | 1.2 | 1.3  | 2.0  | 1.2 |
| 219017_at    | ETNK1       | ethanolamine kinase 1                                                                  | 0.002836563 | 0.6  | -0.9 | 0.8  | 0.8  | 0.0  | 0.3  | 1.3  | 0.0  | 0.1  | 0.5  | 0.6  | 1.0 | 1.0 | 0.4  | 2.6  | 1.0  | 0.7  | 1.5  | 0.9 | 1.6 | 1.0 | 1.2 | 0.5  | 0.8  | 0.6 |
| 212295_s_at  | SLC7A1      | solute carrier family 7 (cationic amino acid transporter, y+ system), member 1         | 0.001057772 | 0.1  | -0.1 | -2.0 | -0.3 | 1.8  | 0.4  | 0.2  | 0.6  | 0.2  | 0.1  | 1.3  | 0.9 | 0.7 | 1.7  | 1.2  | 1.5  | 1.0  | -0.3 | 0.9 | 1.2 | 1.6 | 1.5 | 0.6  | 1.8  | 0.7 |
| 226269_at    | GDAP1       | ganglioside-induced differentiation-associated protein 1                               | 0.007056168 | 0.6  | 0.9  | -0.8 | -0.2 | -0.4 | 0.0  | 0.4  | 0.2  | 0.9  | 0.6  | 1.1  | 1.2 | 1.2 | 0.8  | 1.2  | 1.4  | 0.9  | 0.5  | 1.3 | 1.6 | 0.9 | 1.5 | 0.8  | 1.4  | 0.4 |
| 214426_x_at  | CHAF1A      | chromatin assembly factor 1, subunit A (p150)                                          | 0.006116278 | 0.2  | -0.2 | 0.4  | 0.3  | 0.8  | 0.0  | 1.0  | 0.2  | 0.3  | 0.1  | -0.1 | 1.7 | 1.1 | 1.3  | 0.7  | 1.4  | 1.4  | 0.9  | 0.4 | 1.7 | 1.0 | 0.9 | 1.0  | 1.5  | 0.6 |
| 218817_at    | SPCS3       | signal peptidase complex subunit 3 homolog (S. cerevisiae)                             | 0.000449329 | -1.3 | -0.3 | -0.6 | 0.4  | 0.3  | 0.0  | 0.3  | -0.1 | 0.1  | 0.5  | 0.3  | 1.8 | 0.5 | 0.4  | 1.7  | 0.8  | 1.5  | 1.3  | 0.3 | 2.6 | 0.9 | 1.2 | 1.0  | 1.1  | 0.7 |
| 201277_s_at  | HNRPAB      | heterogeneous nuclear ribonucleoprotein A/B                                            | 0.000389452 | -0.6 | -0.4 | -0.2 | 0.1  | 2.5  | -0.2 | 0.8  | 0.5  | 0.2  | 0.4  | 0.8  | 1.0 | 0.8 | 0.9  | 0.2  | 1.3  | 1.5  | 0.7  | 0.8 | 1.8 | 1.2 | 1.2 | 1.0  | 1.9  | 0.8 |
| 213476_x_at  | TUBB3       | tubulin, beta 3                                                                        | 0.001973278 | -0.1 | 0.4  | -0.9 | 0.3  | -0.2 | -0.2 | 0.5  | 0.3  | 0.2  | 0.6  | 0.9  | 0.8 | 1.0 | 1.0  | -0.6 | 1.3  | 1.5  | 0.7  | 0.7 | 1.7 | 1.6 | 1.4 | 0.8  | 2.0  | 0.7 |
|              |             |                                                                                        |             |      |      |      |      |      |      |      |      |      |      |      |     |     |      |      |      |      |      |     |     |     |     |      |      |     |



|              |          |                                                                                          |             |      |      |      |      |      |      |      |      |      |      |     |      |     |     |      |     |     |      |     |     |     |     |      |     |     |
|--------------|----------|------------------------------------------------------------------------------------------|-------------|------|------|------|------|------|------|------|------|------|------|-----|------|-----|-----|------|-----|-----|------|-----|-----|-----|-----|------|-----|-----|
| 219386_s_at  | SLAMF8   | SLAM family member 8                                                                     | 0.00561512  | -0.1 | -0.5 | -0.8 | 0.6  | -0.5 | 0.7  | 2.1  | 0.0  | 0.4  | 0.8  | 1.2 | 2.8  | 1.7 | 0.7 | -0.5 | 1.0 | 0.6 | 1.7  | 0.2 | 0.3 | 2.4 | 2.7 | 0.8  | 0.2 | 2.1 |
| 214155_s_at  | LARP4    | La ribonucleoprotein domain family, member 4                                             | 0.003240371 | 0.1  | -0.2 | 0.3  | 0.3  | -0.3 | -0.5 | 0.6  | 0.1  | -0.1 | 0.3  | 0.9 | 1.2  | 1.2 | 0.5 | 1.3  | 1.2 | 1.2 | 0.1  | 0.8 | 1.0 | 0.7 | 1.5 | 1.3  | 2.2 | 0.9 |
| 213849_s_at  | PPP2R2B  | protein phosphatase 2 (formerly 2A), regulatory subunit B (PR 52), beta isoform          | 0.004851537 | 0.9  | 0.8  | -0.4 | -0.1 | 1.3  | 0.0  | 0.4  | 0.9  | 0.0  | -0.1 | 1.7 | 1.1  | 0.9 | 2.8 | 2.0  | 1.6 | 0.4 | -0.9 | 0.1 | 0.6 | 1.4 | 1.8 | 0.3  | 1.4 | 1.4 |
| 218911_at    | YEATS4   | YEATS domain containing 4                                                                | 0.007636508 | 0.1  | 0.0  | -0.5 | 0.1  | -0.4 | 0.2  | -0.2 | 0.8  | 0.6  | 0.3  | 1.0 | 0.9  | 0.8 | 2.0 | 1.4  | 2.1 | 1.6 | 0.0  | 0.6 | 1.4 | 0.7 | 1.0 | 0.2  | 1.3 | 0.6 |
| 201946_s_at  | CCT2     | chaperonin containing TCP1, subunit 2 (beta)                                             | 0.001721301 | -0.5 | 0.0  | 0.0  | 0.0  | -0.2 | -0.1 | 0.1  | 0.7  | 0.6  | 0.3  | 0.9 | 0.8  | 0.8 | 0.9 | -0.2 | 1.6 | 1.3 | 0.2  | 1.6 | 1.7 | 1.4 | 1.3 | 0.2  | 1.3 | 1.7 |
| 1564520_s_at | SKB1     | SKB1 homolog (S. pombe)                                                                  | 0.00069822  | -1.1 | 0.2  | -1.1 | 0.2  | 0.1  | 0.8  | -0.5 | 0.0  | 0.4  | -0.2 | 0.8 | 0.4  | 0.5 | 0.7 | 0.3  | 0.9 | 1.6 | 1.1  | 0.9 | 2.0 | 0.8 | 0.9 | 1.2  | 1.7 | 1.1 |
| 212828_at    | SYNJ2    | synaptojanin 2                                                                           | 0.005675929 | 1.5  | 0.0  | -0.2 | 0.2  | -0.1 | -0.8 | -0.5 | 1.1  | 0.1  | 0.1  | 1.2 | -0.2 | 0.4 | 2.1 | 1.3  | 0.1 | 1.3 | -0.2 | 1.0 | 2.1 | 0.9 | 0.9 | 0.7  | 1.2 | 1.9 |
| 200650_s_at  | LDHA     | lactate dehydrogenase A                                                                  | 0.000405127 | -1.1 | 0.5  | -0.9 | 0.3  | 3.1  | 0.2  | 0.4  | 0.4  | 0.5  | 0.5  | 0.6 | 1.3  | 0.8 | 1.0 | 0.9  | 1.0 | 1.2 | 0.8  | 1.0 | 1.5 | 1.1 | 1.2 | 1.1  | 1.3 | 1.1 |
| 225253_s_at  | FLJ12760 | NA                                                                                       | 0.001377796 | -0.4 | 0.4  | 0.2  | 0.1  | 0.0  | 0.4  | 0.0  | 0.6  | 0.0  | 0.6  | 0.7 | 0.7  | 0.9 | 0.8 | 0.5  | 1.4 | 1.1 | 0.4  | 1.0 | 1.8 | 1.1 | 1.5 | 0.5  | 1.7 | 1.1 |
| 202691_at    | SNRPD1   | small nuclear ribonucleoprotein D1 polypeptide 16kDa                                     | 0.004222384 | -0.6 | -0.1 | -0.7 | 0.4  | -0.4 | 0.7  | 0.4  | 0.6  | 0.2  | 0.2  | 0.9 | 1.3  | 0.8 | 1.0 | 0.5  | 1.4 | 1.9 | 0.5  | 0.7 | 1.8 | 1.0 | 1.2 | 0.9  | 1.3 | 0.8 |
| 201521_s_at  | NCBP2    | nuclear cap binding protein subunit 2, 20kDa                                             | 0.003005511 | -0.6 | 0.7  | -0.3 | 0.6  | -0.2 | 0.0  | 0.1  | 0.4  | 0.4  | 0.8  | 0.6 | 0.7  | 0.9 | 0.7 | -0.3 | 1.3 | 1.1 | 0.9  | 0.6 | 2.0 | 0.9 | 1.2 | 1.5  | 2.1 | 1.0 |
| 235139_at    | GNGT2    | guanine nucleotide binding protein (G protein), gamma transducing activity polypeptide 2 | 0.009804943 | 0.2  | 0.6  | -0.1 | 0.1  | -0.3 | 1.0  | 0.9  | 0.9  | 0.2  | 0.3  | 0.9 | 1.7  | 1.0 | 1.6 | 0.0  | 1.2 | 0.6 | 0.7  | 0.3 | 1.3 | 1.4 | 1.3 | 0.9  | 1.6 | 1.7 |
| 214959_s_at  | API5     | apoptosis inhibitor 5                                                                    | 0.002050353 | -0.3 | 0.1  | -0.1 | 0.2  | -0.1 | 0.6  | 0.1  | 0.0  | 0.2  | 0.2  | 1.0 | 1.2  | 0.6 | 1.1 | 1.2  | 2.1 | 0.8 | 0.3  | 1.0 | 1.3 | 1.1 | 1.2 | 0.3  | 1.9 | 0.7 |
| 203594_at    | RTCD1    | RNA terminal phosphate cyclase domain 1                                                  | 0.002883079 | -0.7 | 1.0  | 0.0  | 0.2  | 0.8  | 0.7  | 0.6  | 0.4  | 0.3  | 0.4  | 0.9 | 1.2  | 0.6 | 0.9 | 1.2  | 1.2 | 0.8 | 0.8  | 0.8 | 2.3 | 0.9 | 1.0 | 0.7  | 1.6 | 0.9 |
| 213461_at    | NUDT21   | nudix (nucleoside diphosphate linked moiety X)-type motif 21                             | 0.007936817 | 0.4  | 0.3  | 0.4  | 0.3  | 0.2  | 0.4  | 0.6  | 0.8  | 0.3  | 0.6  | 0.8 | 0.6  | 0.6 | 1.7 | 1.0  | 1.6 | 1.2 | 0.7  | 1.2 | 1.3 | 0.4 | 1.1 | 0.8  | 1.3 | 0.8 |
| 228606_at    | TM4SF19  | transmembrane 4 L six family member 19                                                   | 0.001632062 | -0.3 | -1.2 | 0.0  | 0.9  | -0.9 | -0.4 | -0.3 | 1.1  | 0.4  | 0.3  | 1.6 | 1.1  | 0.6 | 1.9 | 2.2  | 1.8 | 0.9 | 0.2  | 0.4 | 1.4 | 1.1 | 1.4 | 0.2  | 0.7 | 0.8 |
| 205120_s_at  | SGCB     | sarcoglycan, beta (43kDa dystrophin-associated glycoprotein)                             | 0.001424869 | -0.4 | 0.5  | -0.2 | 0.3  | 0.0  | 0.8  | 0.0  | 0.8  | 0.4  | -0.3 | 1.6 | 1.3  | 0.4 | 1.6 | -0.3 | 1.9 | 1.1 | 0.1  | 0.7 | 1.2 | 1.5 | 2.1 | 0.9  | 1.7 | 0.7 |
| 225766_s_at  | TNPO1    | transportin 1                                                                            | 0.002752886 | -0.4 | 0.2  | 0.1  | 0.2  | -0.7 | 0.7  | 0.5  | 0.6  | 0.1  | 0.1  | 0.9 | 1.1  | 0.6 | 1.2 | 1.2  | 1.2 | 1.1 | 0.0  | 1.0 | 1.4 | 0.8 | 1.0 | 1.0  | 1.6 | 1.4 |
| 204775_at    | CHAF1B   | chromatin assembly factor 1, subunit B (p60)                                             | 0.009844047 | -0.1 | -0.7 | 0.8  | 0.1  | -0.1 | 0.5  | 0.1  | 0.6  | 0.5  | 0.9  | 1.5 | 1.5  | 0.7 | 1.7 | 0.8  | 1.8 | 1.2 | 0.3  | 1.1 | 1.0 | 0.8 | 1.1 | 1.2  | 1.6 | 0.5 |
| 217946_s_at  | SAE1     | NA                                                                                       | 0.009894269 | -0.7 | 0.3  | -1.0 | 0.3  | -0.4 | -0.7 | 0.1  | 0.7  | 0.3  | 0.4  | 0.9 | 0.8  | 0.4 | 1.3 | 0.5  | 1.5 | 1.5 | 0.6  | 0.6 | 2.0 | 1.2 | 0.9 | 0.7  | 1.3 | 1.0 |
| 202884_s_at  | PPP2R1B  | protein phosphatase 2 (formerly 2A), regulatory subunit B (PR 65), beta isoform          | 0.001573357 | 0.0  | 0.0  | 0.3  | 0.5  | 0.1  | 0.3  | 0.5  | 0.6  | 0.3  | 0.5  | 1.1 | 0.9  | 0.5 | 1.4 | 1.3  | 1.7 | 1.0 | 0.6  | 0.6 | 1.1 | 1.1 | 0.8 | 0.8  | 1.7 | 0.9 |
| 221923_s_at  | NPM1     | nucleophosmin (nucleolar phosphoprotein B23, numatrin)                                   | 0.003563087 | 0.0  | 0.3  | -0.7 | 0.0  | -0.1 | 0.1  | 0.0  | 0.6  | 0.3  | 0.3  | 0.9 | 0.8  | 0.5 | 1.3 | 1.2  | 1.5 | 1.1 | 0.4  | 0.9 | 1.5 | 1.4 | 1.0 | 0.9  | 1.2 | 0.5 |
| 225723_at    | C6orf129 | chromosome 6 open reading frame 129                                                      | 0.005700454 | -1.7 | 0.2  | -0.2 | 0.3  | 0.3  | 0.1  | 0.5  | 0.7  | 0.4  | 0.5  | 1.3 | 1.0  | 0.9 | 1.6 | 0.3  | 2.1 | 1.2 | 0.1  | 0.9 | 1.9 | 1.2 | 1.5 | 0.5  | 1.0 | 0.4 |
| 218894_s_at  | FLJ10292 | NA                                                                                       | 0.005317679 | -0.2 | 0.0  | 0.0  | 0.2  | 0.2  | -0.2 | 0.4  | 0.4  | 0.4  | 0.1  | 1.4 | 1.1  | 0.7 | 1.2 | 0.5  | 1.8 | 1.0 | 0.0  | 0.7 | 1.8 | 1.1 | 1.2 | 0.9  | 1.6 | 1.0 |
| 239680_at    | WDR76    | WD repeat domain 76                                                                      | 0.003457751 | -0.4 | 0.1  | -0.2 | 0.0  | -0.3 | -0.2 | -0.2 | 1.2  | 0.1  | 0.2  | 1.9 | 1.0  | 1.2 | 2.2 | 1.0  | 1.5 | 0.5 | 0.1  | 0.9 | 0.8 | 0.6 | 1.5 | 0.7  | 1.4 | 1.1 |
| 212185_x_at  | MT2A     | metallothionein 2A                                                                       | 0.001304317 | -0.3 | -0.6 | 0.4  | 0.5  | 0.0  | 0.2  | 0.4  | 0.7  | 0.3  | 0.6  | 0.8 | 1.6  | 1.0 | 1.4 | 0.7  | 1.7 | 1.2 | 0.3  | 0.7 | 1.0 | 1.6 | 1.5 | 0.8  | 0.9 | 0.8 |
| 223151_at    | MGC2714  | NA                                                                                       | 0.009493293 | -0.4 | 1.0  | -1.1 | 0.0  | 0.0  | 0.7  | 0.4  | 0.2  | 0.1  | 0.1  | 0.8 | 1.1  | 0.6 | 1.2 | 0.7  | 1.4 | 1.3 | 0.9  | 0.6 | 1.8 | 1.1 | 1.1 | 0.5  | 1.4 | 0.9 |
| 218027_at    | MRPL15   | mitochondrial ribosomal protein L15                                                      | 0.004537535 | -1.7 | 0.2  | -1.1 | 0.4  | 0.3  | 1.0  | 0.6  | 0.0  | 0.4  | 0.4  | 0.2 | 0.8  | 0.6 | 0.4 | 0.2  | 1.0 | 1.5 | 1.3  | 0.8 | 2.0 | 1.1 | 1.2 | 1.2  | 1.5 | 0.7 |
| 1554020_at   | BICD1    | bicaudal D homolog 1 (Drosophila)                                                        | 0.007070109 | 0.1  | -0.3 | 0.3  | -0.3 | -0.3 | 0.5  | 0.0  | 1.1  | 0.4  | 0.2  | 1.2 | 1.1  | 0.3 | 1.8 | 1.3  | 1.0 | 1.6 | 0.2  | 0.3 | 1.3 | 1.2 | 1.7 | 0.3  | 2.0 | 0.5 |
| 221935_s_at  | AER61    | NA                                                                                       | 0.009037592 | 0.6  | 0.1  | -0.6 | 0.2  | 0.5  | 0.1  | -0.1 | 0.7  | 0.0  | 0.4  | 0.8 | 0.5  | 0.8 | 1.5 | 2.6  | 2.5 | 1.4 | -0.5 | 0.2 | 2.1 | 0.8 | 0.6 | -0.3 | 0.8 | 1.0 |
| 219553_at    | NME7     | non-metastatic cells 7, protein expressed in (nucleoside-diphosphate kinase)             | 0.007721258 | 0.2  | 0.1  | -1.2 | 0.1  | -0.1 | 0.3  | 0.0  | 1.0  | 0.3  | 0.2  | 1.1 | 0.7  | 0.6 | 1.0 | 1.2  | 1.4 | 1.0 | 0.3  | 1.0 | 1.6 | 1.2 | 1.4 | 0.7  | 1.0 | 1.2 |
| 218219_s_at  | LANCL2   | LANC lantibiotic synthetase component C-like 2 (bacterial)                               | 0.00619835  | 0.7  | 0.2  | 0.1  | 0.4  | 0.4  | -0.5 | 0.4  | 0.3  | 0.4  | 0.6  | 1.0 | 0.7  | 0.9 | 1.1 | -0.2 | 1.4 | 1.2 | 0.8  | 0.7 | 1.9 | 1.2 | 1.5 | 0.8  | 1.5 | 0.8 |
| 210732_s_at  | LGALS8   | lectin, galactoside-binding, soluble, 8 (galectin 8)                                     | 0.000179979 | -0.7 | -0.4 | 0.5  | 0.2  | -0.9 | 0.2  | 0.4  | -0.2 | 0.3  | 0.4  | 0.3 | 0.6  | 0.5 | 0.4 | 1.0  | 1.1 | 1.2 | 1.7  | 1.4 | 1.3 | 0.5 | 0.9 | 1.0  | 1.5 | 0.9 |
| 225300_at    | C15orf23 | chromosome 15 open reading frame 23                                                      | 0.006703183 | -0.6 | 0.1  | 0.5  | 0.1  | 0.0  | -0.4 | 1.0  | -0.2 | 0.2  | 0.4  | 0.6 | 0.7  | 0.8 | 0.7 | 0.5  | 0.9 | 1.1 | 0.3  | 1.0 | 1.2 | 0.9 | 1.9 | 1.1  | 2.8 | 0.3 |
| 225485_at    | TSGA14   | testis specific, 14                                                                      | 0.003107903 | 0.2  | -0.2 | -0.6 | 0.3  | 0.9  | -0.1 | -0.7 | 1.1  | -0.1 | 0.3  | 1.4 | 0.7  | 0.2 | 2.6 | 1.5  | 1.3 | 0.7 | 0.0  | 0.7 | 1.4 | 1.0 | 0.7 | 0.4  | 1.2 | 1.7 |
| 203225_s_at  | RFK      | riboflavin kinase                                                                        | 3.53103E-05 | -1.0 | -0.8 | 0.6  | 0.4  | 0.2  | 0.1  | 0.4  | -0.4 | 0.0  | 0.2  | 0.3 | 1.5  | 0.9 | 0.5 | 0.6  | 0.9 | 1.3 | 1.3  | 0.4 | 1.6 | 1.2 | 1.4 | 1.4  | 1.1 | 0.8 |
| 208581_x_at  | MT1X     | metallothionein 1X                                                                       | 0.001097947 | -0.6 | -0.5 | 0.2  | 0.8  | 0.5  | 0.3  | 0.2  | 0.7  | 0.4  | 0.6  | 0.9 | 1.0  | 0.9 | 1.2 | 0.2  | 1.8 | 1.2 | 0.3  | 0.8 | 1.4 | 1.4 | 1.5 | 0.7  | 1.0 | 1.1 |
| 205296_at    | RBL1     | retinoblastoma-like 1 (p107)                                                             | 0.001457195 | 0.0  | 0.0  | -0.1 | 0.3  | -0.1 | -0.6 | 0.2  | 1.0  | 0.0  | 0.0  | 1.2 | 0.7  | 1.1 | 1.6 | 1.2  | 1.7 | 0.8 | 0.3  | 1.0 | 1.5 | 1.1 | 1.0 | 0.1  | 0.8 | 1.0 |
| 219037_at    | CGI-115  | NA                                                                                       | 0.003488622 | 0.1  | -0.5 | -0.2 | -0.2 | -0.7 | -0.2 | 0.8  | 0.5  | 0.2  | 0.1  | 0.9 | 0.4  | 0.7 | 0.6 | 2.7  | 1.1 | 1.1 | 0.0  | 0.8 | 0.7 | 1.6 | 1.3 | 0.6  | 1.5 | 0.6 |
| 213951_s_at  | TBPIP    | NA                                                                                       | 0.003652602 | -0.2 | -0.3 | 0.2  | 0.7  | 0.3  | 0.0  | 0.5  | 0.6  | 0.2  | -0.1 | 1.1 | 1.6  | 0.9 | 0.5 | 0.4  | 1.4 | 1.9 | 0.6  | 0.6 | 1.0 | 1.5 | 1.2 | 0.6  | 2.4 | 0.5 |
| 204639_at    | ADA      | adenosine deaminase                                                                      | 0.009683159 | 0.5  | 0.8  | -0.5 | 0.2  | 1.7  | 0.1  | 0.4  | 1.1  | 0.4  | 0.3  | 1.8 | 1.1  | 1.1 | 2.1 | 1.0  | 1.5 | 1.1 | 0.3  | 0.6 | 0.8 | 1.6 | 1.2 | 0.0  | 0.6 | 1.5 |
| 212514_x_at  | DDX3X    | DEAD (Asp-Glu-Ala-Asp) box polypeptide 3, X-linked                                       | 0.000595116 | 0.5  | -0.9 | 0.0  | 0.4  | -0.1 | 0.7  | 0.5  | 0.4  | -0.2 | 0.3  | 0.2 | 1.0  | 0.4 | 0.2 | 1.2  | 0.7 | 1.1 | 0.9  | 1.1 | 1.9 | 0.8 | 1.0 | 1.2  | 1.8 | 0.8 |
| 36830_at     | MIPEP    | mitochondrial intermediate peptidase                                                     | 0.004522498 | 0.2  | 0.0  | -0.4 | 0.6  | 0.0  | -0.2 | -0.1 | 0.6  | 0.3  | 0.1  | 1.0 | 0.5  | 0.9 | 1.8 | 1.3  | 1.7 | 1.0 | 0.1  | 0.8 | 1.4 | 0.8 | 1.2 | 0.2  | 1.3 | 0.9 |
| 205401_at    | AGPS     | alkylglycerone phosphate synthase                                                        | 0.002266967 | 0.3  | -0.2 | -1.3 | 0.6  | 0.0  | 0.4  | 0.3  | 0.1  | 0.3  | 0.7  | 0.4 | 1.0  | 1.1 | 0.4 | 0.0  | 1.0 | 1.8 | 1.3  | 0.5 | 2.0 | 0.9 | 1.0 | 0.7  | 1.8 | 0.7 |
| 214011_s_at  | HSPC111  | NA                                                                                       | 0.00161894  | 0.0  | 0.7  | 0.4  | 0.2  | 0.0  | 0.2  | 0.7  | 0.3  | 0.2  | 0.3  | 1.0 | 0.0  | 0.7 | 0.7 | 0.5  | 0.9 | 1.0 | 0.8  | 0.7 | 1.2 | 1.7 | 1.4 | 0.9  | 1.7 | 1.0 |
| 231862_at    | CBX5     | chromobox homolog 5 (HP1 alpha homolog, Drosophila)                                      | 0.000775278 | -0.6 | -0.4 | -0.3 | -0.4 | 0.2  | -0.8 | -0.1 | 1.0  | 0.0  | -0.3 | 1.1 | 0.4  | 0.3 | 1.4 | 0.7  | 1.4 | 1.4 | 0.3  | 0.9 | 1.3 | 0.5 | 0.8 | 1.0  | 1.8 | 1.5 |
| 200622_x_at  | CALM3    | calmodulin 3 (phosphorylase kinase, delta)                                               | 0.000551764 | -1.3 | -0.4 | 0.1  | 0.5  | -0.2 | 0.5  | 0.8  | 0.3  | 0.3  | 0.7  | 0.9 | 1.1  | 0.9 | 1.1 | -0.2 | 1.0 | 1.6 | 1.4  | 0.9 | 2.0 | 0.8 | 0.9 | 0.8  | 1.1 | 1.0 |
| 218477_at    | TMEM14A  | transmembrane protein 14A                                                                | 0.007142823 | 0.2  | 0.9  | -1.3 | 0.1  | 1.2  | -0.5 | -0.4 | 0.9  | 0.2  | 0.3  | 1.7 | 0.3  | 0.3 | 1.8 | 2.5  | 1.9 | 1.2 | -0.4 | 0.5 | 1.0 | 1.4 | 0.9 | -0.1 | 0.9 | 1.2 |

|              |           |                                                                                                         |             |      |      |      |      |      |      |      |      |      |      |      |      |      |      |      |      |      |      |      |      |      |      |      |      |      |
|--------------|-----------|---------------------------------------------------------------------------------------------------------|-------------|------|------|------|------|------|------|------|------|------|------|------|------|------|------|------|------|------|------|------|------|------|------|------|------|------|
| 225736_at    | FBXO22    | F-box protein 22                                                                                        | 0.001306867 | -0.7 | -1.0 | -0.5 | 0.2  | -0.7 | 0.7  | 0.9  | 0.6  | 0.1  | 0.0  | 0.8  | 1.1  | 0.7  | 0.6  | 0.4  | 1.3  | 0.7  | 1.3  | 1.1  | 1.3  | 0.9  | 0.8  | 1.5  | 2.2  | 0.4  |
| 232155_at    | KIAA1618  | KIAA1618                                                                                                | 0.005842972 | -0.4 | -0.2 | -0.7 | 0.1  | 0.3  | -0.5 | 0.2  | 1.2  | 0.5  | 0.0  | 0.9  | 2.1  | 0.9  | 1.6  | 0.4  | 1.4  | 0.5  | 0.0  | 0.8  | 0.6  | 1.3  | 1.1  | 0.8  | 1.7  | 2.0  |
| 225711_at    | ARL6IP6   | ADP-ribosylation-like factor 6 interacting protein 6                                                    | 0.001279216 | -0.3 | -0.5 | 0.3  | 0.0  | -0.3 | 0.7  | 0.9  | -0.1 | 0.4  | 0.4  | 0.5  | 0.8  | 1.0  | 1.1  | 1.6  | 1.4  | 1.6  | 0.5  | 0.8  | 1.1  | 0.6  | 1.2  | 0.3  | 1.6  | 0.3  |
| 226085_at    | CBX5      | chromobox homolog 5 (HP1 alpha homolog, Drosophila)                                                     | 0.000299248 | -1.6 | -0.6 | 0.0  | -0.6 | -0.9 | -0.3 | 0.2  | 1.0  | 0.3  | -0.1 | 1.2  | -0.1 | 0.4  | 1.5  | 1.1  | 0.9  | 1.2  | 0.4  | 0.6  | 1.6  | 1.1  | 0.9  | 0.8  | 1.4  | 1.1  |
| 208838_at    | CAND1     | cullin-associated and neddylation-dissociated 1                                                         | 0.006955016 | 0.3  | 1.0  | 0.0  | 0.3  | 1.2  | 1.3  | 0.8  | 0.5  | 0.0  | 0.2  | 0.7  | 0.8  | 0.6  | 0.9  | 3.1  | 1.1  | 0.8  | 0.5  | 0.6  | 1.2  | 0.5  | 1.1  | 0.9  | 1.3  | 0.4  |
| 204507_s_at  | PPP3R1    | protein phosphatase 3 (formerly 2B), regulatory subunit B, 19kDa, alpha isoform (calcineurin B, type I) | 0.001837825 | 0.3  | -1.3 | 0.0  | 0.3  | 0.2  | -0.3 | 1.4  | -0.1 | 0.5  | 0.1  | 0.3  | 0.8  | 0.6  | 0.0  | 0.1  | 1.3  | 1.6  | 1.2  | 0.4  | 2.0  | 0.9  | 1.3  | 1.1  | 2.2  | 0.5  |
| 223306_at    | EBPL      | emopamil binding protein-like                                                                           | 0.008979848 | -1.9 | 0.0  | -1.3 | 0.5  | -1.0 | 1.4  | 0.1  | 0.3  | 0.5  | 0.2  | 0.7  | 1.0  | 0.2  | 0.6  | 1.2  | 1.2  | 1.6  | 0.5  | 0.8  | 2.4  | 0.8  | 0.7  | 1.1  | 1.0  | 0.7  |
| 225614_at    | LOC113174 | NA                                                                                                      | 0.001682634 | 0.3  | -0.5 | -0.1 | 0.4  | 0.2  | 0.3  | 0.1  | 0.8  | 0.1  | 0.3  | 1.1  | 0.8  | 0.6  | 1.2  | 1.0  | 1.5  | 1.3  | 0.4  | 0.9  | 1.3  | 1.0  | 0.8  | 0.4  | 1.6  | 1.0  |
| 213983_s_at  | SCC-112   | NA                                                                                                      | 0.004948176 | -0.1 | -0.6 | 0.7  | 0.4  | 0.9  | 0.8  | 0.1  | 0.5  | 0.7  | 0.1  | 0.5  | 1.0  | 0.1  | 1.5  | 0.7  | 1.8  | 1.5  | 0.6  | 0.9  | 1.5  | 1.1  | 0.8  | 0.5  | 1.3  | 0.7  |
| 206237_s_at  | NRG1      | neuregulin 1                                                                                            | 0.003130984 | -0.5 | -0.1 | 0.1  | 1.2  | -0.6 | 0.6  | 0.3  | -1.4 | -0.2 | -0.1 | -2.7 | -0.7 | -1.4 | -1.3 | -1.3 | -0.1 | -0.3 | -0.2 | -1.0 | -0.9 | -2.0 | -1.7 | -0.5 | -0.6 | -1.7 |
| 1562255_at   | SYTL3     | synaptotagmin-like 3                                                                                    | 0.001408293 | 2.7  | 0.7  | 0.7  | 0.2  | 0.9  | -1.0 | -0.8 | -0.2 | -0.1 | -0.8 | -2.1 | -1.7 | -1.1 | -2.1 | 0.4  | -1.5 | -1.3 | -2.6 | -1.2 | -1.0 | -0.6 | -0.9 | -1.7 | -0.9 | 1.2  |
| 227082_at    | NA        | NA                                                                                                      | 0.001571023 | 2.1  | 0.5  | -0.5 | 0.3  | 0.0  | -0.7 | -0.6 | 0.5  | -0.9 | -0.3 | -0.8 | -1.6 | -0.5 | -1.4 | 0.4  | -1.3 | -1.3 | -0.8 | -0.1 | -1.0 | -1.0 | -1.9 | -1.5 | -3.0 | 0.0  |
| 1555847_a_at | LOC284454 | NA                                                                                                      | 0.006733493 | 1.2  | -0.6 | -0.8 | -0.2 | 0.1  | -1.6 | -0.2 | -0.8 | -0.2 | -0.1 | -2.0 | -0.6 | -0.4 | -0.6 | -1.8 | -3.4 | -0.4 | 0.8  | -1.9 | -0.6 | -0.1 | -1.7 | -0.2 | -1.1 | -2.5 |
| 216248_s_at  | NR4A2     | nuclear receptor subfamily 4, group A, member 2                                                         | 0.009021854 | 1.9  | 0.9  | 0.5  | 1.7  | 0.7  | -2.6 | -3.6 | -0.4 | 1.3  | 0.8  | -3.3 | -1.9 | -1.0 | 1.6  | -2.5 | -1.8 | 3.3  | 1.9  | -1.8 | 0.9  | 0.6  | -4.2 | -3.4 | -5.1 | -3.8 |
| 204622_x_at  | NR4A2     | nuclear receptor subfamily 4, group A, member 2                                                         | 0.008556579 | 1.8  | 1.0  | 0.4  | 1.6  | 0.7  | -2.6 | -3.4 | -0.6 | 1.2  | 0.8  | -3.4 | -1.6 | -1.0 | 1.5  | -2.7 | -1.9 | 2.5  | 1.4  | -1.9 | 0.2  | 0.6  | -3.8 | -2.9 | -4.4 | -3.8 |
