# Supplementary material
Source: PubMed Central journal article supplement (PMC11030614)
Supplement: 262_2008_479_MOESM2_ESM.pdf [file 262_2008_479_MOESM2_ESM.pdf]

**Supplementary data table 2:** Overrepresented GO-terms. For each GO-term the GO-identifier (GOid), p-value (from the hypergeometric t-test (uncorrected values)), gene count, and the index number referring to Fig 3A are listed.

| <b>GOid</b> | <b>GOterm</b>                                        | <b>P.value</b> | <b>Gene count</b> | <b>Index (GO-tree)</b> |
|-------------|------------------------------------------------------|----------------|-------------------|------------------------|
| GO:0007049  | cell cycle                                           | 6.3e-37        | 83                | 1                      |
| GO:0000278  | mitotic cell cycle                                   | 9.1e-31        | 45                | 2                      |
| GO:0051301  | cell division                                        | 1.8e-28        | 40                | 3                      |
| GO:0000279  | M phase                                              | 3.0e-27        | 41                | 4                      |
| GO:0007067  | mitosis                                              | 5.5e-27        | 37                | 5                      |
| GO:0000087  | M phase of mitotic cell cycle                        | 9.0e-27        | 37                | 6                      |
| GO:0006260  | DNA replication                                      | 1.6e-25        | 36                | 7                      |
| GO:0006259  | DNA metabolism                                       | 1.7e-20        | 57                | 8                      |
| GO:0007051  | spindle organization and biogenesis                  | 3.5e-18        | 14                | 9                      |
| GO:0007017  | microtubule-based process                            | 3.5e-16        | 26                | 10                     |
| GO:0006261  | DNA-dependent DNA replication                        | 9.2e-16        | 20                | 11                     |
| GO:0000074  | regulation of progression through cell cycle         | 3.5e-15        | 43                | 12                     |
| GO:0051726  | regulation of cell cycle                             | 4.4e-15        | 43                | 13                     |
| GO:0000226  | microtubule cytoskeleton organization and biogenesis | 2.0e-12        | 15                | 14                     |
| GO:0000075  | cell cycle checkpoint                                | 2.1e-11        | 13                | 15                     |
| GO:0006270  | DNA replication initiation                           | 2.4e-11        | 10                | 16                     |
| GO:0006996  | organelle organization and biogenesis                | 3.1e-11        | 52                | 17                     |
| GO:0006974  | response to DNA damage stimulus                      | 1.2e-10        | 26                | 18                     |
| GO:0006281  | DNA repair                                           | 1.4e-10        | 24                | 19                     |
| GO:0043283  | biopolymer metabolism                                | 5.6e-10        | 102               | 20                     |
| GO:0009719  | response to endogenous stimulus                      | 6.1e-10        | 26                | 21                     |
| GO:0007059  | chromosome segregation                               | 1.0e-09        | 11                | 22                     |
| GO:0043170  | macromolecule metabolism                             | 1.7e-09        | 137               | 23                     |
| GO:0050875  | cellular physiological process                       | 2.8e-09        | 249               | 24                     |
| GO:0016043  | cell organization and biogenesis                     | 2.9e-09        | 70                | 25                     |
| GO:0007010  | cytoskeleton organization and biogenesis             | 5.0e-09        | 29                | 26                     |

|            |                                                                |         |     |    |
|------------|----------------------------------------------------------------|---------|-----|----|
| GO:0007088 | regulation of mitosis                                          | 5.4e-09 | 11  | 27 |
| GO:0030705 | cytoskeleton-dependent intracellular transport                 | 7.8e-09 | 15  | 28 |
| GO:0007018 | microtubule-based movement                                     | 7.8e-09 | 14  | 29 |
| GO:0051329 | interphase of mitotic cell cycle                               | 9.2e-08 | 11  | 30 |
| GO:0051325 | interphase                                                     | 1.6e-07 | 11  | 31 |
| GO:0048015 | phosphoinositide-mediated signaling                            | 2.0e-07 | 12  | 32 |
| GO:0051649 | establishment of cellular localization                         | 7.4e-07 | 34  | 33 |
| GO:0051641 | cellular localization                                          | 1.0e-06 | 34  | 34 |
| GO:0006139 | nucleobase, nucleoside, nucleotide and nucleic acid metabolism | 2.7e-06 | 107 | 35 |
| GO:0009117 | nucleotide metabolism                                          | 5.8e-06 | 16  | 36 |
| GO:0009165 | nucleotide biosynthesis                                        | 8.8e-06 | 13  | 37 |
| GO:0044238 | primary metabolism                                             | 1.6e-05 | 181 | 38 |
| GO:0046907 | intracellular transport                                        | 3.1e-05 | 30  | 39 |
| GO:0044237 | cellular metabolism                                            | 3.4e-05 | 183 | 40 |
| GO:0007582 | physiological process                                          | 4.6e-05 | 257 | 41 |
| GO:0051276 | chromosome organization and biogenesis                         | 6.2e-05 | 19  | 42 |
| GO:0008152 | metabolism                                                     | 1.2e-04 | 190 | 43 |
| GO:0008283 | cell proliferation                                             | 2.8e-04 | 26  | 44 |
| GO:0019932 | second-messenger-mediated signaling                            | 6.3e-04 | 13  | 45 |
